# Supplementary material for: The Metabolic Switch of Physical Activity in Non-Obese Insulin Resistant Individuals
Source: MDPI journal article supplement (doi:10.3390/ijms24097816), 2023-04-25
Supplement: s1 [file s1]

Supplementary Figure 1: OPLS-DA of four groups observed 2 principal components with R2Y of 15.2% and R2X of 12.3%.

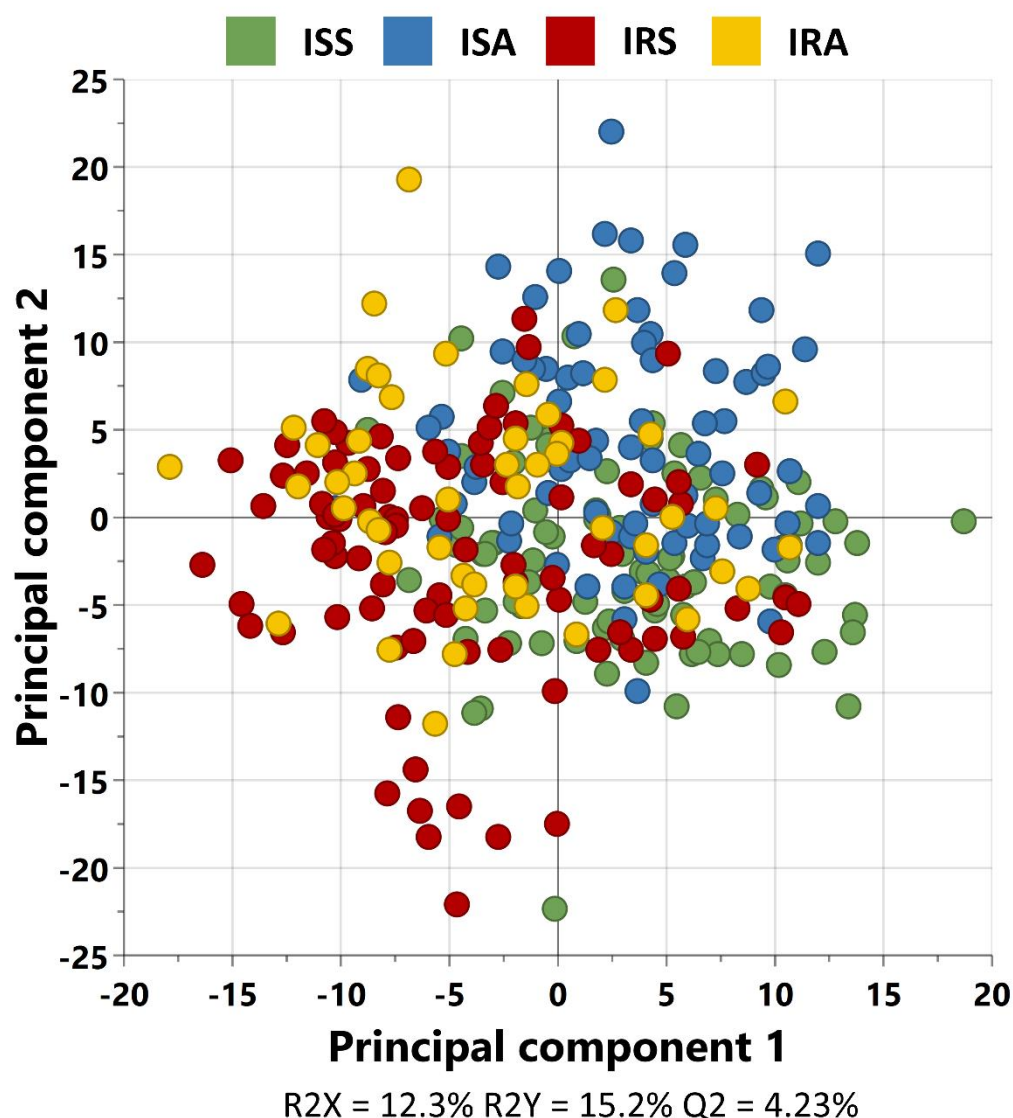

Supplementary table 1: Corresponding Variable importance of projection from OPLS-DA of four groups, metabolites with VIP score > 1.5 are mentioned.

| Metabolite                                                      | Super pathway                     | Sub pathway                               | VIP SCORE |
|-----------------------------------------------------------------|-----------------------------------|-------------------------------------------|-----------|
| 1-carboxyethylphenylalanine                                     | Amino Acid                        | Phenylalanine Metabolism                  | 2.37306   |
| gamma-glutamylleucine                                           | Peptide                           | Gamma-glutamyl Amino Acid                 | 2.34239   |
| palmitoleate (16:1n7)                                           | Lipid                             | Long Chain Monounsaturated Fatty Acid     | 2.29808   |
| myristoleate (14:1n5)                                           | Lipid                             | Long Chain Monounsaturated Fatty Acid     | 2.26711   |
| branched-chain, straight-chain, or cyclopropyl 12:1 fatty acid* | Partially Characterized Molecules | Partially Characterized Molecules         | 2.24644   |
| gamma-glutamylisoleucine*                                       | Peptide                           | Gamma-glutamyl Amino Acid                 | 2.20521   |
| leucine                                                         | Amino Acid                        | Leucine, Isoleucine and Valine Metabolism | 2.17993   |
| gamma-glutamylvaline                                            | Peptide                           | Gamma-glutamyl Amino Acid                 | 2.17101   |
| creatinine                                                      | Amino Acid                        | Creatine Metabolism                       | 2.17072   |
| 5-dodecenoate (12:1n7)                                          | Lipid                             | Medium Chain Fatty Acid                   | 2.15556   |

|                                              |            |                                                      |         |
|----------------------------------------------|------------|------------------------------------------------------|---------|
| isoleucine                                   | Amino Acid | Leucine, Isoleucine and Valine Metabolism            | 2.1298  |
| isovalerylcarnitine (C5)                     | Amino Acid | Leucine, Isoleucine and Valine Metabolism            | 2.10341 |
| 2-methylbutyrylcarnitine (C5)                | Amino Acid | Leucine, Isoleucine and Valine Metabolism            | 2.09172 |
| tetradecadienoate (14:2)*                    | Lipid      | Long Chain Polyunsaturated Fatty Acid (n3 and n6)    | 2.06867 |
| picolinoylglycine                            | Lipid      | Fatty Acid Metabolism (Acyl Glycine)                 | 2.06648 |
| oleate/vaccenate (18:1)                      | Lipid      | Long Chain Monounsaturated Fatty Acid                | 2.06103 |
| 10-heptadecenoate (17:1n7)                   | Lipid      | Long Chain Monounsaturated Fatty Acid                | 2.02649 |
| valine                                       | Amino Acid | Leucine, Isoleucine and Valine Metabolism            | 2.0263  |
| 2-hydroxy-3-methylvalerate                   | Amino Acid | Leucine, Isoleucine and Valine Metabolism            | 2.02484 |
| dodecadienoate (12:2)*                       | Lipid      | Fatty Acid, Dicarboxylate                            | 2.0236  |
| N-acetylcarnosine                            | Amino Acid | Histidine Metabolism                                 | 2.02189 |
| phenyllactate (PLA)                          | Amino Acid | Phenylalanine Metabolism                             | 2.0161  |
| 3-(4-hydroxyphenyl)lactate                   | Amino Acid | Tyrosine Metabolism                                  | 2.00173 |
| gamma-glutamylphenylalanine                  | Peptide    | Gamma-glutamyl Amino Acid                            | 1.9869  |
| hexadecadienoate (16:2n6)                    | Lipid      | Long Chain Polyunsaturated Fatty Acid (n3 and n6)    | 1.97593 |
| myristate (14:0)                             | Lipid      | Long Chain Saturated Fatty Acid                      | 1.94938 |
| 3-hydroxybutyrate (BHBA)                     | Lipid      | Ketone Bodies                                        | 1.94034 |
| alpha-hydroxyisocaproate                     | Amino Acid | Leucine, Isoleucine and Valine Metabolism            | 1.93179 |
| linoleate (18:2n6)                           | Lipid      | Long Chain Polyunsaturated Fatty Acid (n3 and n6)    | 1.92653 |
| indolelactate                                | Amino Acid | Tryptophan Metabolism                                | 1.91426 |
| N-acetylglycine                              | Amino Acid | Glycine, Serine and Threonine Metabolism             | 1.90245 |
| deoxycarnitine                               | Lipid      | Carnitine Metabolism                                 | 1.87486 |
| 2-oxoarginine*                               | Amino Acid | Urea cycle; Arginine and Proline Metabolism          | 1.86856 |
| 10-nonadecenoate (19:1n9)                    | Lipid      | Long Chain Monounsaturated Fatty Acid                | 1.86784 |
| eicosenoate (20:1)                           | Lipid      | Long Chain Monounsaturated Fatty Acid                | 1.86545 |
| urate                                        | Nucleotide | Purine Metabolism, (Hypo)Xanthine/Inosine containing | 1.85349 |
| hydroxy-N6,N6,N6-trimethyllysine*            | Amino Acid | Lysine Metabolism                                    | 1.85062 |
| 1-methylhistidine                            | Amino Acid | Histidine Metabolism                                 | 1.84485 |
| N,N,N-trimethyl-alanylproline betaine (TMAP) | Amino Acid | Urea cycle; Arginine and Proline Metabolism          | 1.83996 |
| 2-aminoadipate                               | Amino Acid | Lysine Metabolism                                    | 1.83334 |
| (2 or 3)-decenoate (10:1n7 or n8)            | Lipid      | Medium Chain Fatty Acid                              | 1.81297 |
| gamma-glutamylmethionine                     | Peptide    | Gamma-glutamyl Amino Acid                            | 1.79799 |
| 3-methyl-2-oxovalerate                       | Amino Acid | Leucine, Isoleucine and Valine Metabolism            | 1.7978  |
| prolylglycine                                | Peptide    | Dipeptide                                            | 1.7859  |
| gamma-glutamyltyrosine                       | Peptide    | Gamma-glutamyl Amino Acid                            | 1.77783 |
| tryptophan                                   | Amino Acid | Tryptophan Metabolism                                | 1.77648 |
| N6,N6,N6-trimethyllysine                     | Amino Acid | Lysine Metabolism                                    | 1.77425 |
| N-acetylleucine                              | Amino Acid | Leucine, Isoleucine and Valine Metabolism            | 1.77404 |
| 4-methyl-2-oxopentanoate                     | Amino Acid | Leucine, Isoleucine and Valine Metabolism            | 1.77345 |
| tiglylcarnitine (C5:1-DC)                    | Amino Acid | Leucine, Isoleucine and Valine Metabolism            | 1.76315 |
| phenylalanine                                | Amino Acid | Phenylalanine Metabolism                             | 1.75198 |
| xanthurenate                                 | Amino Acid | Tryptophan Metabolism                                | 1.74869 |

|                                                  |             |                                                      |         |
|--------------------------------------------------|-------------|------------------------------------------------------|---------|
| 2,3-dihydroxy-5-methylthio-4-pentenoate (DMTPA)* | Amino Acid  | Methionine, Cysteine, SAM and Taurine Metabolism     | 1.74385 |
| 10-undecenoate (11:1n1)                          | Lipid       | Medium Chain Fatty Acid                              | 1.74155 |
| kynurenate                                       | Amino Acid  | Tryptophan Metabolism                                | 1.73611 |
| 11beta-hydroxyandrosterone glucuronide           | Lipid       | Androgenic Steroids                                  | 1.73092 |
| cis-4-decenoate (10:1n6)*                        | Lipid       | Medium Chain Fatty Acid                              | 1.72952 |
| dihomo-linoleate (20:2n6)                        | Lipid       | Long Chain Polyunsaturated Fatty Acid (n3 and n6)    | 1.72559 |
| gamma-glutamyl-2-aminobutyrate                   | Peptide     | Gamma-glutamyl Amino Acid                            | 1.71999 |
| alpha-hydroxyisovalerate                         | Amino Acid  | Leucine, Isoleucine and Valine Metabolism            | 1.71953 |
| linolenate [alpha or gamma; (18:3n3 or 6)]       | Lipid       | Long Chain Polyunsaturated Fatty Acid (n3 and n6)    | 1.71575 |
| argininate*                                      | Amino Acid  | Urea cycle; Arginine and Proline Metabolism          | 1.70446 |
| 3-hydroxydecanoate                               | Lipid       | Fatty Acid, Monohydroxy                              | 1.69048 |
| cysteinylglycine disulfide*                      | Amino Acid  | Glutathione Metabolism                               | 1.6864  |
| 5alpha-androstan-3beta,17beta-diol disulfate     | Lipid       | Androgenic Steroids                                  | 1.68575 |
| palmitate (16:0)                                 | Lipid       | Long Chain Saturated Fatty Acid                      | 1.68514 |
| 1-carboxyethylvaline                             | Amino Acid  | Leucine, Isoleucine and Valine Metabolism            | 1.68513 |
| pentadecanoate (15:0)                            | Lipid       | Long Chain Saturated Fatty Acid                      | 1.68049 |
| gamma-glutamylhistidine                          | Peptide     | Gamma-glutamyl Amino Acid                            | 1.67372 |
| S-carboxyethylcysteine                           | Amino Acid  | Methionine, Cysteine, SAM and Taurine Metabolism     | 1.67287 |
| cys-gly, oxidized                                | Amino Acid  | Glutathione Metabolism                               | 1.66244 |
| docosadienoate (22:2n6)                          | Lipid       | Long Chain Polyunsaturated Fatty Acid (n3 and n6)    | 1.64032 |
| decanoylcarnitine (C10)                          | Lipid       | Fatty Acid Metabolism (Acyl Carnitine, Medium Chain) | 1.62648 |
| 3-hydroxy-2-ethylpropionate                      | Amino Acid  | Leucine, Isoleucine and Valine Metabolism            | 1.62585 |
| 4-guanidinobutanoate                             | Amino Acid  | Guanidino and Acetamido Metabolism                   | 1.61437 |
| N-acetylisoleucine                               | Amino Acid  | Leucine, Isoleucine and Valine Metabolism            | 1.61223 |
| EDTA                                             | Xenobiotics | Chemical                                             | 1.60788 |
| kynurenine                                       | Amino Acid  | Tryptophan Metabolism                                | 1.60438 |
| isobutyrylcarnitine (C4)                         | Amino Acid  | Leucine, Isoleucine and Valine Metabolism            | 1.59764 |
| 3,5-dichloro-2,6-dihydroxybenzoic acid           | Xenobiotics | Chemical                                             | 1.59603 |
| picolinate                                       | Amino Acid  | Tryptophan Metabolism                                | 1.57207 |
| hexanoylglutamine                                | Lipid       | Fatty Acid Metabolism (Acyl Glutamine)               | 1.56466 |
| 2-aminobutyrate                                  | Amino Acid  | Glutathione Metabolism                               | 1.56052 |
| stearidonate (18:4n3)                            | Lipid       | Long Chain Polyunsaturated Fatty Acid (n3 and n6)    | 1.55328 |
| 3-bromo-5-chloro-2,6-dihydroxybenzoic acid*      | Xenobiotics | Chemical                                             | 1.54977 |
| sarcosine                                        | Amino Acid  | Glycine, Serine and Threonine Metabolism             | 1.54167 |
| N-acetylphenylalanine                            | Amino Acid  | Phenylalanine Metabolism                             | 1.53688 |
| docosapentaenoate (n3 DPA; 22:5n3)               | Lipid       | Long Chain Polyunsaturated Fatty Acid (n3 and n6)    | 1.5329  |
| gamma-glutamyl-alpha-lysine                      | Peptide     | Gamma-glutamyl Amino Acid                            | 1.52827 |
| propionylcarnitine (C3)                          | Lipid       | Fatty Acid Metabolism (also BCAA Metabolism)         | 1.51959 |
| 5alpha-androstan-3alpha,17beta-diol disulfate    | Lipid       | Androgenic Steroids                                  | 1.51684 |
| N-acetyltryptophan                               | Amino Acid  | Tryptophan Metabolism                                | 1.51682 |
| 1-methylguanidine                                | Amino Acid  | Guanidino and Acetamido Metabolism                   | 1.50709 |

|                                       |            |                                                  |         |
|---------------------------------------|------------|--------------------------------------------------|---------|
| 2-hydroxy-4-(methylthio)butanoic acid | Amino Acid | Methionine, Cysteine, SAM and Taurine Metabolism | 1.50547 |
|---------------------------------------|------------|--------------------------------------------------|---------|

Supplementary figure 2: Heatmap of top 100 metabolites from the univariate analysis that differentiate IS and IR among sedentary individuals.

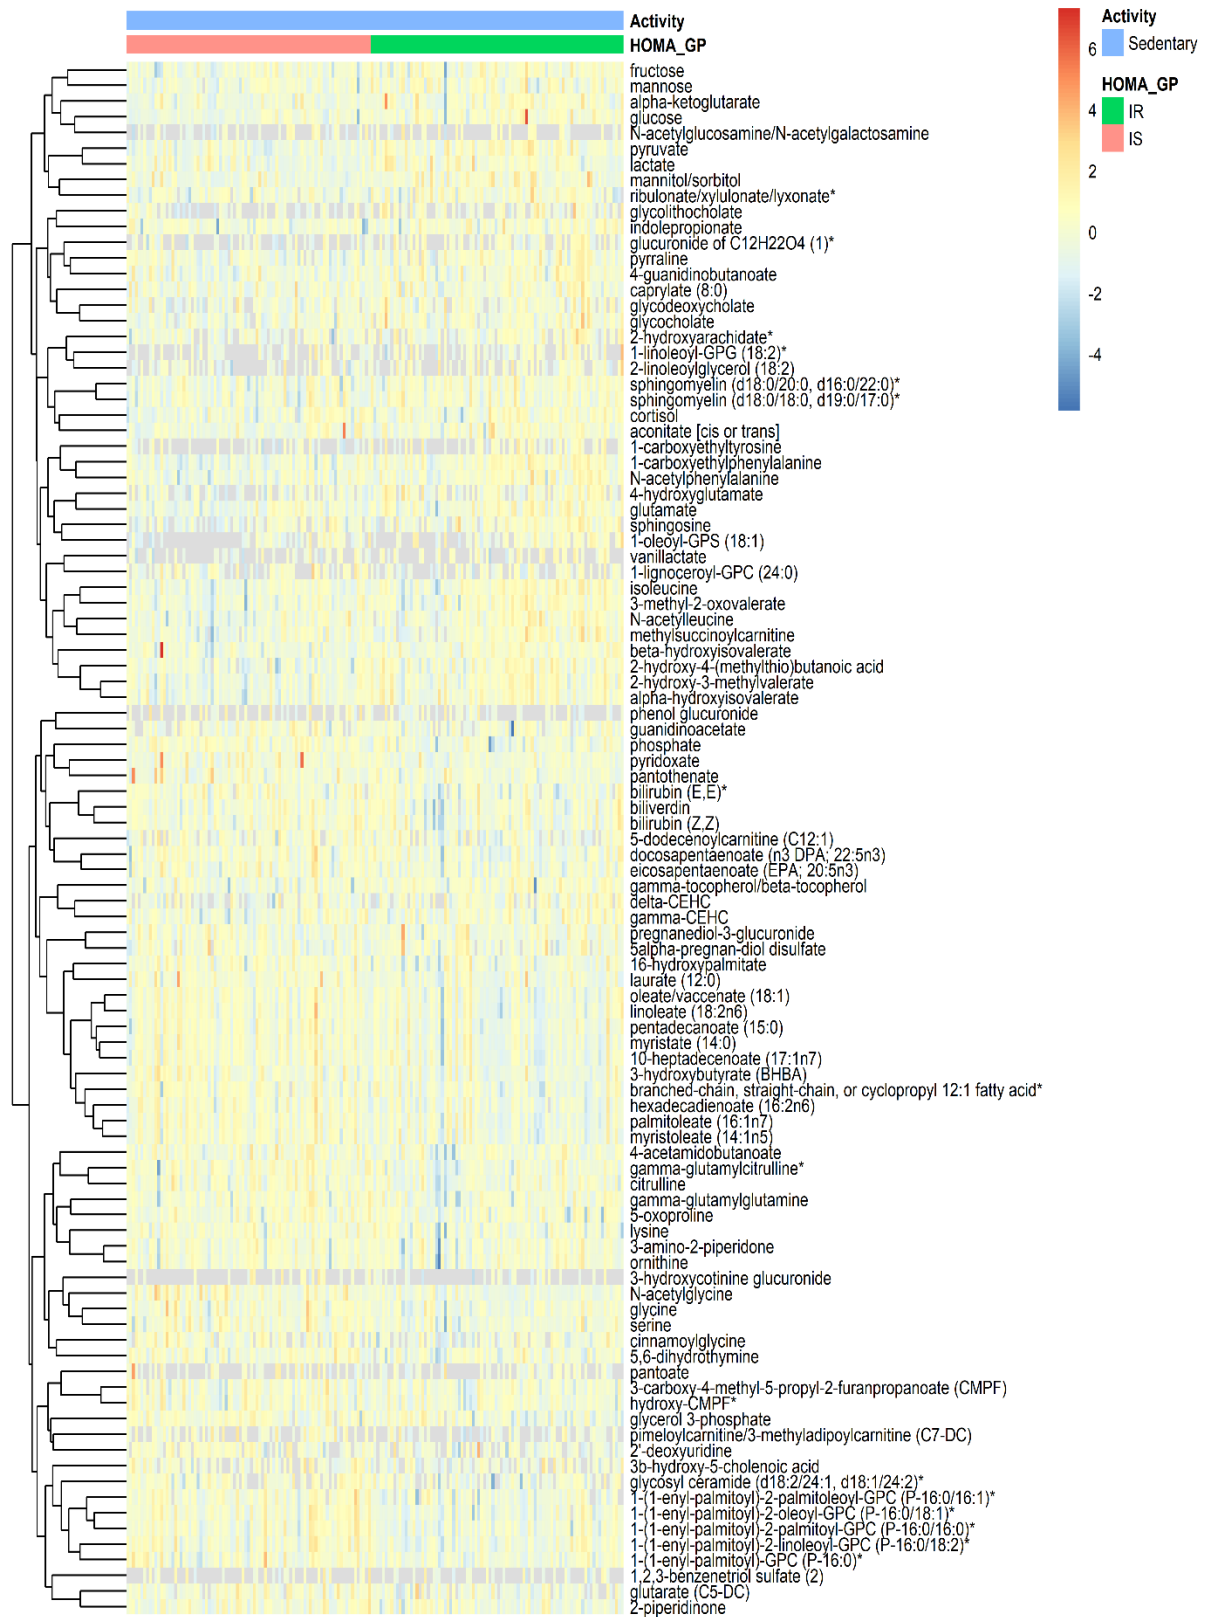

Supplementary figure 3: Heatmap of top 100 metabolites from the univariate analysis that differentiate IS and IR among active individuals.

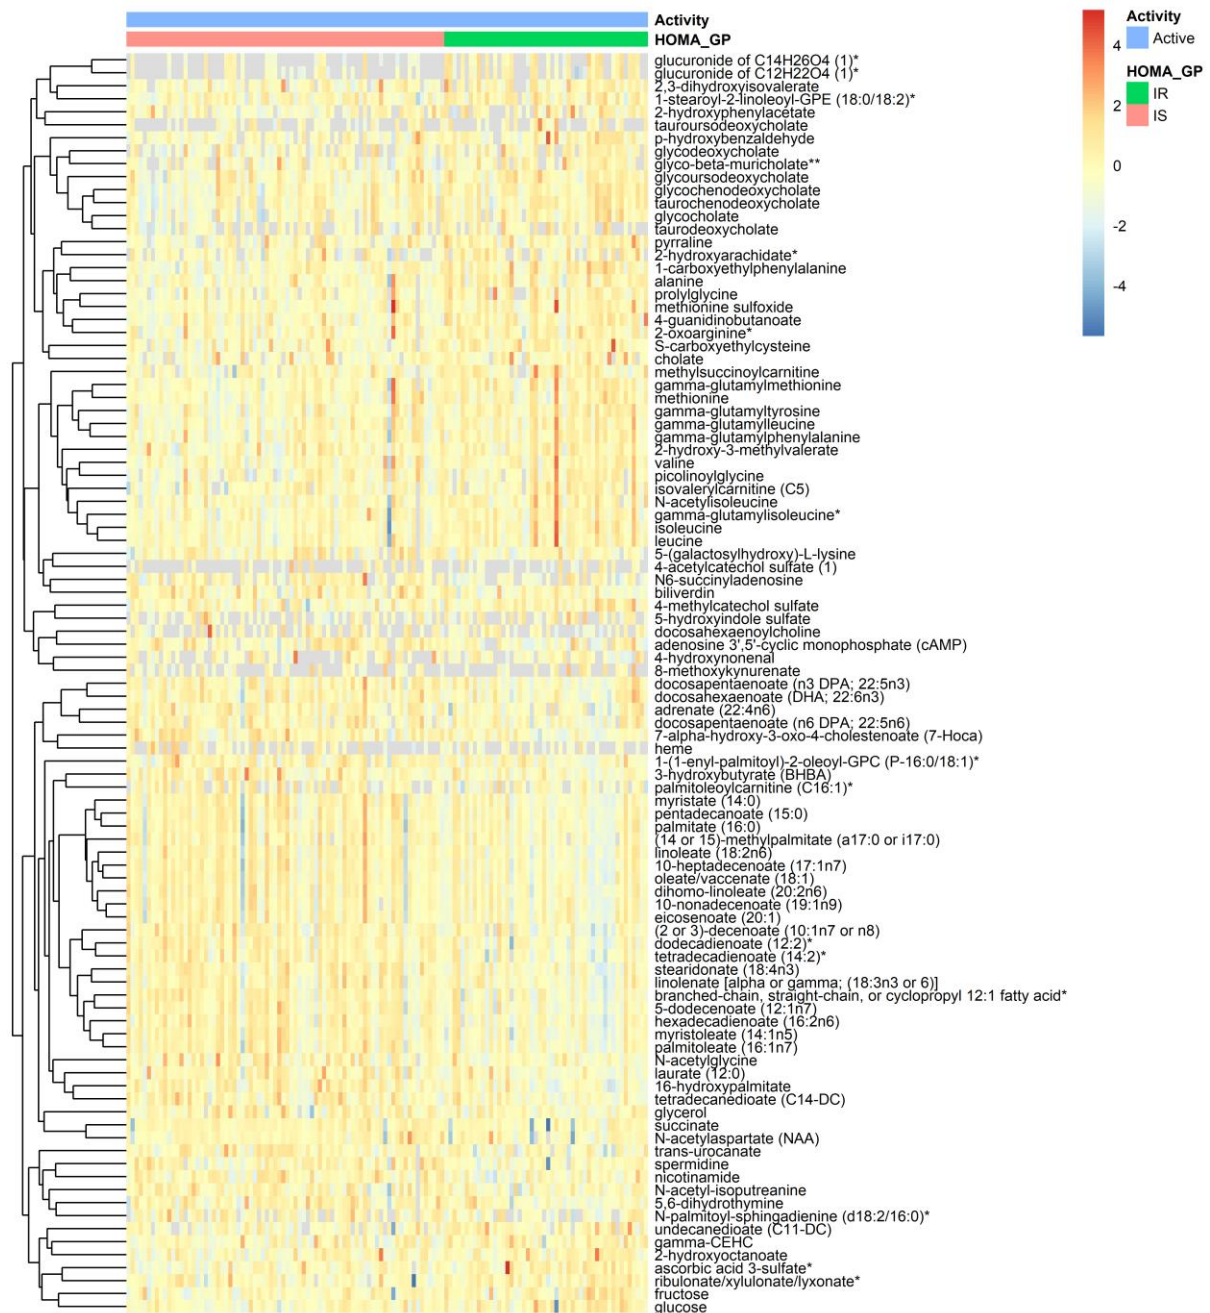

Supplementary figure 4: Volcano plot of metabolites in (a) sedentary (b) active individuals between the insulin sensitive (IS) and the insulin sensitive (IR) groups (Red represents the down-regulated metabolites compared with IR group, green represents the up-regulated metabolites compared with IR group, and gray represents the metabolites with no significant difference between the IS and the IR group).

(a)

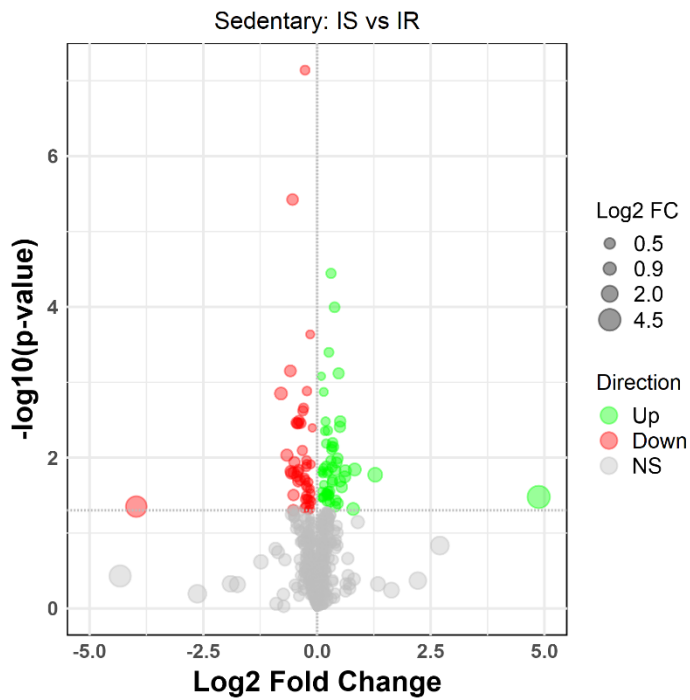

(b)

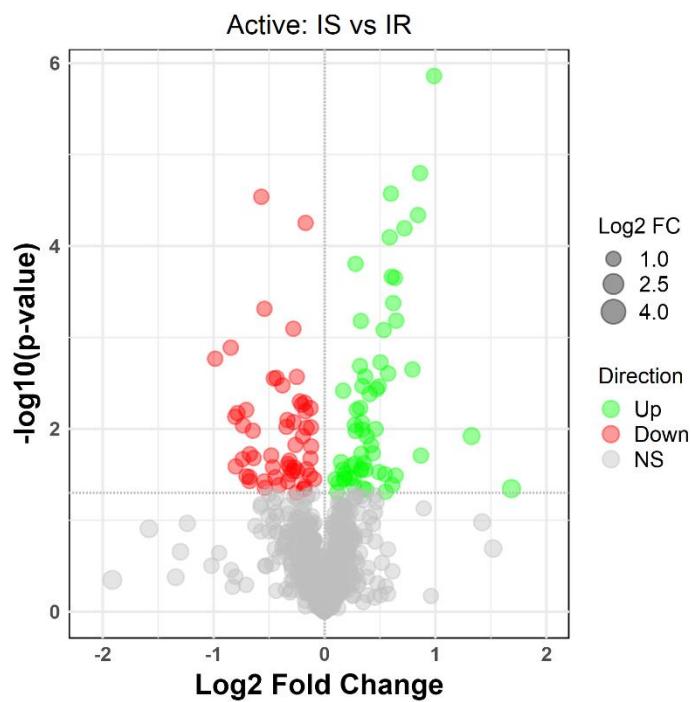

(a)

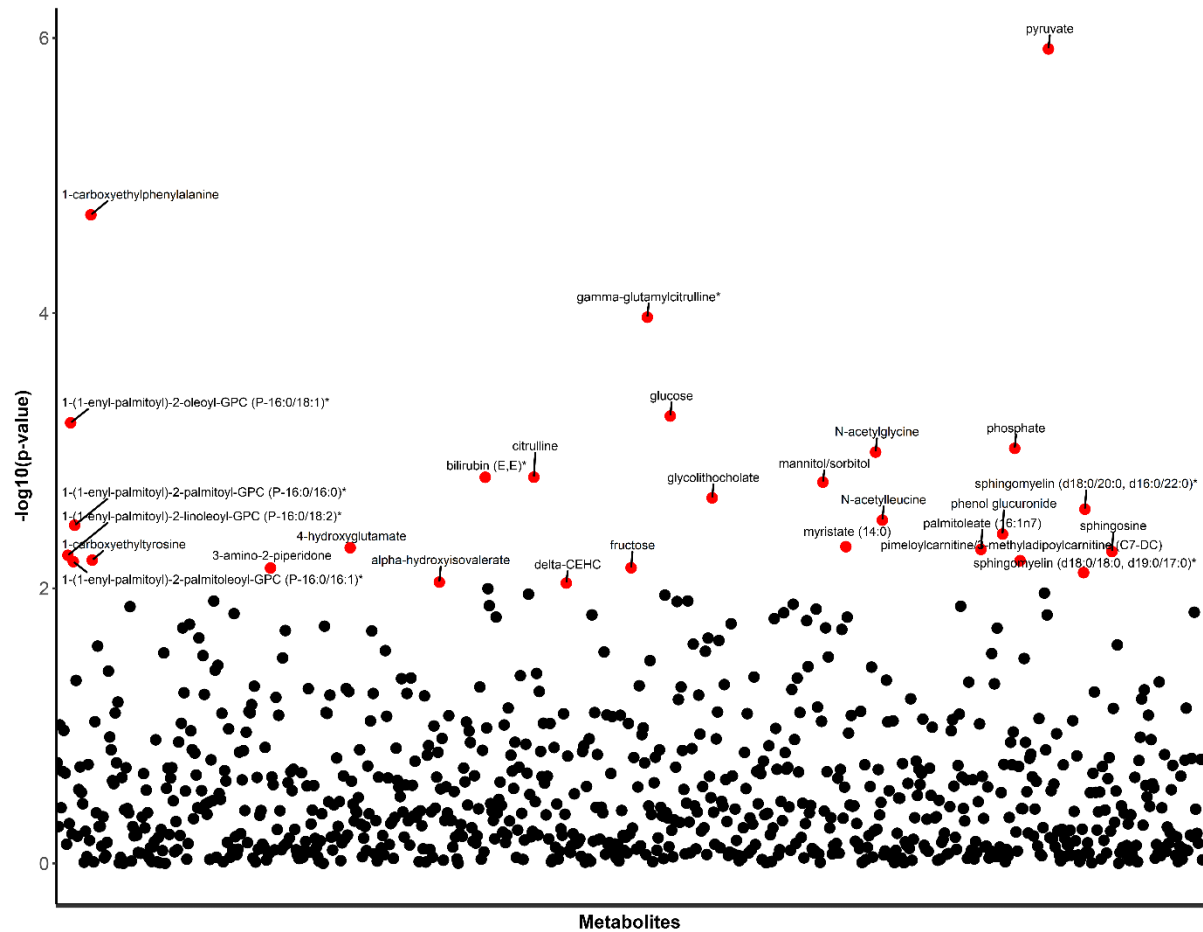



(b)

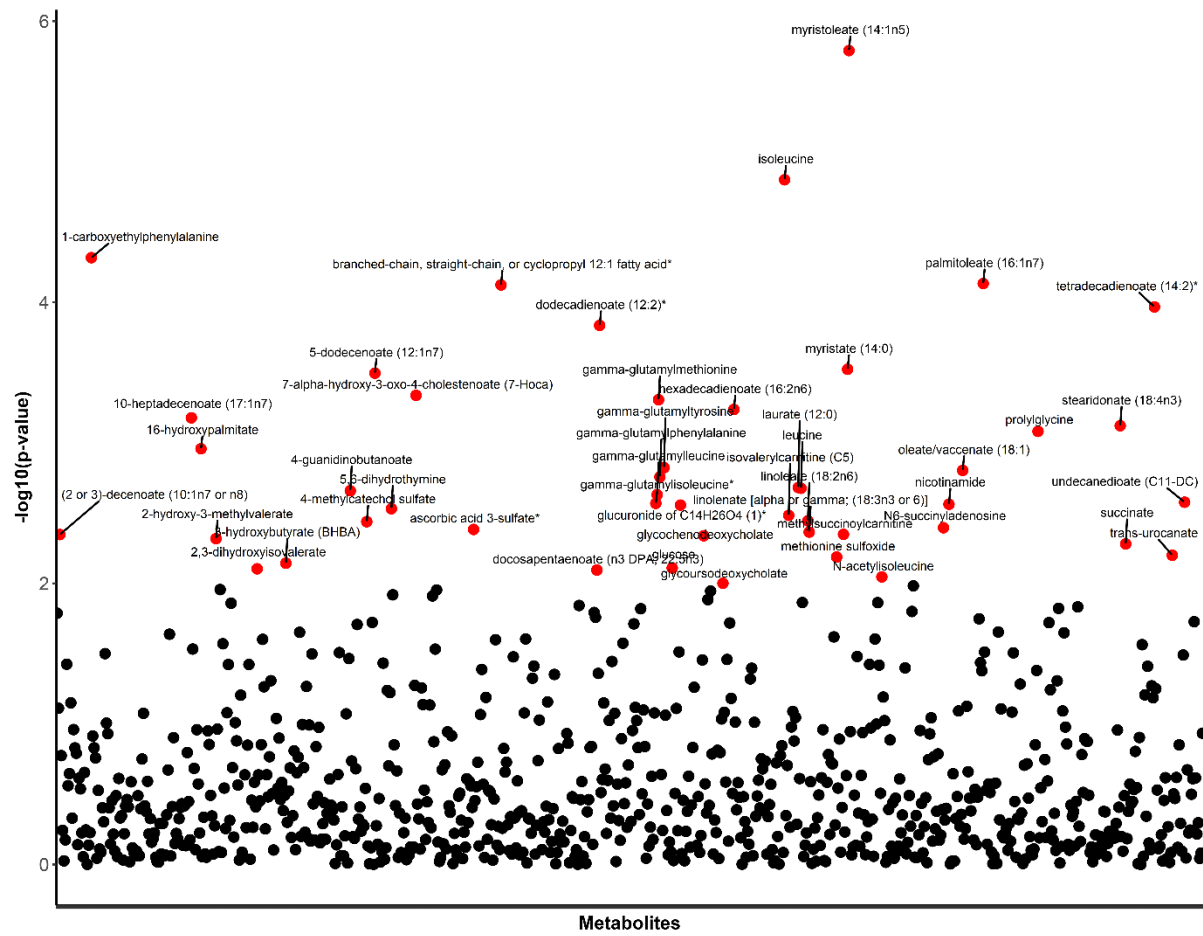

Supplementary table 2: Findings of functional enrichment analysis which was conducted using the Wilcoxon rank sum test on metabolite ranks ranked by p-values (sedentary individuals).

| <b>Sub-pathways</b>                               | <b>p-value</b> | <b>FDR</b> |
|---------------------------------------------------|----------------|------------|
| Long Chain Monounsaturated Fatty Acid             | 0.001          | 0.069      |
| Leucine, Isoleucine and Valine Metabolism         | 0.003          | 0.141      |
| Hemoglobin and Porphyrin Metabolism               | 0.004          | 0.147      |
| Progestin Steroids                                | 0.006          | 0.150      |
| Urea cycle; Arginine and Proline Metabolism       | 0.012          | 0.237      |
| Phenylalanine Metabolism                          | 0.021          | 0.241      |
| Pantothenate and CoA Metabolism                   | 0.022          | 0.241      |
| Long Chain Polyunsaturated Fatty Acid (n3 and n6) | 0.027          | 0.249      |
| Guanidino and Acetamido Metabolism                | 0.029          | 0.249      |
| Plasmalogen                                       | 0.030          | 0.249      |

Supplementary table 3: Findings of functional enrichment analysis which was conducted using the Wilcoxon rank sum test on metabolite ranks ranked by p-values (active individuals).

| <b>Sub-pathways</b>                               | <b>p-value</b> | <b>FDR</b> |
|---------------------------------------------------|----------------|------------|
| Long Chain Polyunsaturated Fatty Acid (n3 and n6) | 0.000          | 0.001      |
| Long Chain Monounsaturated Fatty Acid             | 0.001          | 0.045      |
| Medium Chain Fatty Acid                           | 0.002          | 0.066      |
| Leucine, Isoleucine and Valine Metabolism         | 0.007          | 0.167      |
| Fatty Acid, Dicarboxylate                         | 0.016          | 0.311      |
| Primary Bile Acid Metabolism                      | 0.019          | 0.311      |
| Gamma-glutamyl Amino Acid                         | 0.031          | 0.387      |
| Pyrimidine Metabolism, Uracil containing          | 0.031          | 0.387      |
| Long Chain Saturated Fatty Acid                   | 0.040          | 0.414      |
| Creatine Metabolism                               | 0.041          | 0.414      |
| Ketone Bodies                                     | 0.050          | 0.459      |
