# Supplementary material for: The Metabolic Switch of Physical Activity in Non-Obese Insulin Resistant Individuals
Source: Int J Mol Sci. 2023 Apr 25;24(9):7816. doi: 10.3390/ijms24097816 (PMC10178125; doi:10.3390/ijms24097816)
Supplement: Supplementary file 1 [file ijms-24-07816-s001.zip › Supplementary Table 4.csv]

Metabolite	S-1-pyrroline-5-carboxylate	spermidine	1-methylnicotinamide	12,13-DiHOME	5-hydroxyindoleacetate	alpha-ketoglutarate	kynurenate	3-hydroxyisobutyrate	3-hydroxy-3-methylglutarate	homovanillate (HVA)	3-phosphoglycerate	cholate	4-hydroxynonenal	4-hydroxyphenylacetate	5,6-dihydrothymine	hypoxanthine	9,10-DiHOME	linoleate (18:2n6)	laurate (12:0)	quinolinate	N6,N6,N6-trimethyllysine	N-acetylputrescine	N-formylmethionine	S-adenosylhomocysteine (SAH)	adenosine 3',5'-cyclic monophosphate (cAMP)	adenosine 5'-monophosphate (AMP)	5-methylthioadenosine (MTA)	N6-methyladenosine	arachidonate (20:4n6)	arginine	aspartate	2-hydroxyphenylacetate	3-(4-hydroxyphenyl)lactate	phenylpyruvate	beta-alanine	biliverdin	succinate	3-hydroxybutyrate (BHBA)	cholesterol	choline phosphate	corticosterone	cortisone	creatinine	cysteinylglycine	cystine	sphingosine	deoxycholate	cystathionine	sphinganine
Superpathway	Amino Acid	Amino Acid	Cofactors and Vitamins	Lipid	Amino Acid	Energy	Amino Acid	Amino Acid	Lipid	Amino Acid	Carbohydrate	Lipid	Lipid	Amino Acid	Nucleotide	Nucleotide	Lipid	Lipid	Lipid	Cofactors and Vitamins	Amino Acid	Amino Acid	Amino Acid	Amino Acid	Nucleotide	Nucleotide	Amino Acid	Nucleotide	Lipid	Amino Acid	Amino Acid	Amino Acid	Amino Acid	Amino Acid	Nucleotide	Cofactors and Vitamins	Energy	Lipid	Lipid	Lipid	Lipid	Lipid	Amino Acid	Amino Acid	Amino Acid	Lipid	Lipid	Amino Acid	Lipid
Subpathway	Glutamate Metabolism	Polyamine Metabolism	Nicotinate and Nicotinamide Metabolism	Fatty Acid, Dihydroxy	Tryptophan Metabolism	TCA Cycle	Tryptophan Metabolism	Leucine, Isoleucine and Valine Metabolism	Mevalonate Metabolism	Tyrosine Metabolism	Glycolysis, Gluconeogenesis, and Pyruvate Metabolism	Primary Bile Acid Metabolism	Fatty Acid, Oxidized	Phenylalanine Metabolism	Pyrimidine Metabolism, Thymine containing	Purine Metabolism, (Hypo)Xanthine/Inosine containing	Fatty Acid, Dihydroxy	Long Chain Polyunsaturated Fatty Acid (n3 and n6)	Medium Chain Fatty Acid	Nicotinate and Nicotinamide Metabolism	Lysine Metabolism	Polyamine Metabolism	Methionine, Cysteine, SAM and Taurine Metabolism	Methionine, Cysteine, SAM and Taurine Metabolism	Purine Metabolism, Adenine containing	Purine Metabolism, Adenine containing	Polyamine Metabolism	Purine Metabolism, Adenine containing	Long Chain Polyunsaturated Fatty Acid (n3 and n6)	Urea cycle; Arginine and Proline Metabolism	Alanine and Aspartate Metabolism	Phenylalanine Metabolism	Tyrosine Metabolism	Phenylalanine Metabolism	Pyrimidine Metabolism, Uracil containing	Hemoglobin and Porphyrin Metabolism	TCA Cycle	Ketone Bodies	Sterol	Phospholipid Metabolism	Corticosteroids	Corticosteroids	Creatine Metabolism	Glutathione Metabolism	Methionine, Cysteine, SAM and Taurine Metabolism	Sphingosines	Secondary Bile Acid Metabolism	Methionine, Cysteine, SAM and Taurine Metabolism	Sphingolipid Synthesis
1	0.138630868	-0.107139876	0.316779603	0.253168264	-0.069028586	-0.37775267	-0.005515181	0.097943074	-0.369615455	NA	0.533682406	0.338897864	0.456221592	-0.273121921	-0.144101344	1.085189268	0.159394052	-0.551300456	-0.390970662	-0.061556306	0.306086664	-0.199304962	-0.105805059	-0.127606125	-0.404215889	0.667521633	-0.238257189	-0.189587893	-0.283158984	0.020586634	0.062786988	-0.14352401	-0.317591603	0.124339274	0.237283115	0.374524685	-0.15466748	0.231825752	0.080104244	0	NA	-0.485482816	0.095491981	0.17697395	-0.403467105	-0.264486515	-0.137998498	-0.006621876	NA
2	0.244043615	0.045068963	-0.009545413	0	NA	-0.472085795	-0.048350261	-0.712126147	-0.827135821	0.259591192	-0.606602579	-1.251413879	-0.089596534	NA	0.345077958	-0.455548608	0.164921042	-0.752897185	1.324897566	-0.008132983	-0.299484785	-0.006521217	-0.113728765	-0.30788478	-0.101036544	-0.055618424	-0.256700335	-0.051503843	-1.282294771	0.097126711	-0.248717802	-0.512994641	0.01607018	0.45266671	-0.208994128	-0.023575737	0.053066721	-0.167472354	-0.412036653	-0.001801622	NA	-0.058264908	-0.055935632	-0.000300045	0.097943074	NA	0.808972746	0.093945613	NA
3	0.080934617	0.3074847	-0.118558336	0	-0.080126044	-0.370339306	0.393190077	0.066255796	0.108405874	-0.114849842	-0.322687682	4.268453319	-0.119572135	0.130501808	0.142107017	-1.667067025	0.740889177	-0.058158914	-0.738981717	-0.066887946	0.776108701	-0.050346374	0.036910354	-0.202116184	0.09567375	-0.165700456	-0.241052972	-0.071281202	0.287882052	-0.103917113	-0.41536394	-0.136507245	-0.027885203	0.161268148	-0.206409352	0.548237009	-0.177692288	-0.558965999	0.206282194	-0.084033996	NA	-0.297597737	0.132430787	-0.759073331	0.128217298	-0.769812265	1.01884732	0.368109322	NA
4	0.384377656	-0.264747101	0.158541028	0.602948913	NA	-0.495608658	0.473435235	0.00608147	-0.466968241	-0.095520202	-0.78745786	-1.304898723	0.664850581	-0.297867098	-0.073538903	-1.539445541	0.009257021	0.062974799	1.114452829	-1.123314901	-0.360252765	-0.431706419	-0.308837615	-0.538539462	-0.327809864	-0.609541597	-1.043840053	-0.152568599	-0.292225713	-0.019998647	-0.265529268	0.271781323	-0.460766424	-0.200281882	0.179985497	0.505129431	-0.223018559	1.449785459	-0.025010163	-0.118220631	NA	-0.398539148	-0.108142159	-0.403616817	-0.066781034	-1.340938659	0.41534943	-0.810355381	NA
5	-0.046881986	0.214950076	0.580594194	-0.671190013	NA	-0.327809864	-0.449416996	0.250135956	NA	-0.768733168	-0.859674131	-0.704005924	-0.820071874	-0.722370039	0.285028555	0.182404887	-0.428324402	0.289829765	0.428725802	-0.183322057	-0.3588201	-0.217782945	-0.239399974	NA	-0.218529214	-0.030046921	-0.061769026	-0.079692769	0.006776984	0.036910354	-0.323792959	-0.689553645	-0.606052474	0.151432704	0.037873652	0.273228115	-0.341786331	0.789547675	-0.185366187	-0.051925073	1.164275177	0.321213556	-0.222893583	-0.246668096	-0.463306108	-0.945977042	0.346776112	-0.603123678	NA
6	-0.455864066	0.100840315	1.061187296	-0.602027587	NA	-0.295579845	-0.015519812	0.668495817	0.050693114	NA	-0.180203801	-1.22758267	-0.426331301	-1.234432012	0.007273484	0.785224869	NA	0.424221437	0.322807874	-0.070422464	0.062693069	-0.419766893	-0.099599365	-0.158526908	0.09148469	-0.655466114	-0.157355811	0.058834786	0.037199441	0.160927664	-0.112049504	NA	0.17889904	0.403730271	0.275128606	0.237992754	-0.038221213	1.110968963	0.06803241	-0.071818288	-0.026754737	-0.28941691	-0.022961612	-0.209857207	0.325339064	-0.701986129	-0.482724194	-0.710293339	NA
7	-0.150241663	-0.667869373	-0.620454495	0.159990736	-0.400029906	-0.159934038	-0.091348039	0.102105223	0	-0.063578982	-0.554951682	-1.48236483	NA	-0.240798487	0.136975455	-0.03397052	-0.223143551	-0.392450171	0.732031299	-0.712533894	0.144446604	-0.11440126	-0.134560493	-0.318003832	-0.259288998	0.017446914	-0.329059777	-0.114064956	-0.49053292	0.004888034	-0.09123848	0	-0.176259965	-0.158878505	0.367832467	-0.045939232	-1.450726221	-0.216788786	0.054772236	-0.17840922	NA	-0.054139446	-0.016841017	0.24043322	-0.242708707	-0.455548608	-0.610461814	-0.61452086	NA
8	-0.074184898	-0.348706774	0.179400628	0.097761718	-0.576075509	-0.208747671	-0.203708639	-0.281169989	0.110377907	NA	-1.127938118	-0.50766396	NA	-1.033386504	-0.350550877	-1.229974607	0.358024034	0.113328685	0.207989304	-0.504843552	-0.280243143	-0.106583485	-0.213440776	-0.246284244	-0.131476363	-0.78987837	-0.478519789	-0.106027405	-0.231679882	0.292594984	-0.422662133	-0.760783829	-0.429706572	0.129184458	-0.13547614	0.029170377	-0.233572747	1.353822821	0.010247316	0.006876304	NA	-0.466968241	-0.340660997	-0.566162169	0.0978524	NA	0.013311014	-1.149169012	NA
9	-0.807436327	-0.446599651	-0.722781986	0.589895551	NA	-0.490206337	0.246391218	-1.117183674	0.156490797	NA	-0.282495546	-0.954511945	0.094582642	0.14384057	-0.074400323	-0.039572775	1.099811569	0.077331343	-0.293029679	-0.263705163	-0.224269185	-0.4144554	-0.120361357	-0.278920567	-0.173520401	-0.578390943	0.057608313	-0.180443322	-0.015519812	-0.283822862	-0.284753033	-0.024600117	-0.416880011	0.447118757	0.319616691	-0.842111334	-0.032419891	1.635475961	0.169236317	-0.097723089	NA	-0.109033921	-0.079367935	-0.603306477	-0.410829471	-0.02809088	0.191776716	-0.391118514	-0.260845418
10	-0.005716307	-0.331007197	-1.068859331	0.302028666	NA	-0.698159722	0.092396849	-0.358676947	-0.173639356	-0.768948894	0.007074914	1.0979454	NA	-0.455390917	0.408527082	-2.233992302	0.236415094	-0.187897071	-0.272465107	-0.084904507	0.131905071	-0.153384307	-0.136163425	-0.69936648	-0.002402885	-0.694147681	0.153836345	-0.213688393	-0.172688108	0.256500955	-0.5642264	-0.449416996	-0.409322538	0.396020649	-0.39988073	-0.072463172	0.007174204	-0.75098818	0.17697395	0.10858531	NA	-0.456179623	-0.15466748	0.203675268	-0.161930867	-1.043840053	NA	0.181821432	NA
11	NA	-0.484183693	-0.123863987	0.684055981	-0.834250022	0.173701175	-0.20383124	NA	0.022250609	-0.32545317	-0.311565013	NA	-0.014606152	-0.292225713	0.035946127	1.426019755	0.03979747	0.45082081	2.092604528	-0.233572747	-0.081643989	-0.034591445	0.558300638	-1.005668543	-0.112385131	0.091575943	0.251847619	-0.025728149	-0.578390943	0.189545402	-0.581426931	0.300178664	-0.812381268	-0.310473161	-0.546452801	1.047810102	0.182071526	2.360938903	-0.109145447	0.017643435	NA	-0.398688124	-0.191766016	0.007670506	-0.447381451	NA	0.119825393	-0.851908473	NA
12	-0.49053292	NA	-0.180802711	0.518972349	NA	-0.024600117	-0.754171882	NA	0.151260794	-0.750776293	-0.484833043	-0.342912933	-0.391118514	-0.687761708	0.253401138	-0.086320706	-0.005816885	0.770802425	0.669776194	-0.4547604	-0.566867015	-0.003004509	-0.15466748	0.285028555	-0.066994869	-0.280905088	-1.040154719	-0.062620362	-0.028605257	-0.380089802	0.133918818	-0.031490667	-0.66533748	-0.214679473	-0.094200795	-0.317042228	0.050693114	3.202974059	-0.150009267	-0.275358323	NA	0.120712075	-0.206286434	-0.523235644	-0.073108472	-0.040509543	-0.536314387	-0.661648514	-0.426484475
13	0.02264173	-0.274042187	0.35676494	0.538362967	0.904865714	0.665930134	0.973049066	1.21405184	0.06241126	NA	0.385874458	0.116448813	-0.24692408	0.557900031	0.021272135	0.821452441	1.378312591	-0.523910863	-1.238219243	0.21511138	-0.006823225	0.074550731	0.052497569	0.599385801	-0.21109147	-0.368602943	-0.271677498	-0.087848091	0.156405279	-0.043638457	0.014790085	0.416998344	0.309394639	0.351994005	-0.022552404	0.311374185	0.044877759	0.768764727	-0.216416231	-0.077853439	-0.506833602	-0.897959775	0.172523714	-0.549220012	-0.024907636	0.287807065	-0.267356706	0.847283575	NA
14	0.071669287	-0.347007539	-0.745282935	-0.084360349	0.668137018	-0.166881372	0.112792827	0.163478469	-0.177931208	-0.282230294	-0.41794263	-0.473048259	NA	NA	0.144879261	-0.178648311	0.573180513	0.752877285	0.147730112	0.145571123	0.37692845	-0.46203546	0.026641931	-0.733760863	-0.001200721	0.063538021	-0.247692424	0.158711691	0.164751436	-0.025112701	-0.21183276	NA	0.195155515	0.073250462	0.193920693	-0.257734996	0.263901544	1.619408045	-0.111490376	-0.047720736	NA	-0.090581378	-0.228281729	-0.33086797	-0.347290544	-1.285906187	-0.55739326	-0.489716661	NA
15	0.197784717	-0.195528384	-0.267879445	0.370528538	-0.451770861	-0.078502228	-0.56141741	-1.130102956	-0.513161684	0.055718489	NA	-0.932674211	-0.384192973	-0.50071029	-0.11272087	-0.912298711	0.194579454	0.518138817	0.271247766	0	0.124780717	0.364573667	0.09921165	-0.506003933	0.295799041	-0.403467105	0.146867076	-0.192978137	0.532567546	0.056569351	-0.825993094	-0.05287349	-0.3074767	-0.125903417	-0.085231144	0.258510695	-0.035005609	0.923663486	0.255262181	0.034304804	-0.918543267	-0.270366195	-0.053400777	-0.263574997	0.392785055	-1.046684196	-0.6361999	-0.185968198	NA
16	-0.291556234	-0.196988594	0.179066264	-0.020610954	-0.342349474	-0.152918106	0.015184135	0.224023164	-0.134217342	0	-0.217658621	-0.387576075	0.338042432	-0.682009436	-0.222268934	0.546733162	-0.032729825	-0.009848336	0.259282598	-1.177006356	-0.30069977	-0.317591603	-0.1806829	-0.401224114	0.24912314	-0.50385001	-0.404215889	-0.213936071	-0.278392026	-0.174591511	-0.228533049	-0.725877005	-0.293968457	-0.236355445	-0.41113113	-0.226398844	0.269950798	1.293712955	0.148764773	-0.055618424	-0.950623411	-0.10280822	-0.181282097	-0.038429027	-0.277863764	NA	NA	-0.314984755	NA
17	-0.328087487	-0.044892769	0	0.466622921	-0.216416231	-0.43912531	0.384718035	-0.626610657	-0.145025772	-0.262534279	0.631697218	-0.167945391	-0.082078111	-0.185847767	0.252469317	0.355364085	0.719253428	0.541859066	-0.053611769	-0.557567886	-0.165818485	0.073064571	0.068592791	0.14366735	-0.686767574	0.022446189	0.123102197	-0.238003414	0.711478137	-0.052135754	-0.404665428	NA	-0.583217121	-0.513830133	0.074086543	-0.029737818	0.239961336	0.206526245	-0.382579004	-0.089487167	NA	NA	-0.200892942	-0.634312395	-0.566867015	NA	-0.320067533	-0.393931872	NA
18	0.297657155	-0.115074208	0.6408007	-0.175902205	-0.347432077	-0.875148789	0.28855669	0.188137942	-0.150241663	-0.441144101	-0.342631164	2.099023556	NA	0.427422275	-0.258382203	-0.210844496	-0.302998777	-0.006923915	-0.402270217	0.492926384	0.183986836	-0.016841017	-0.160990686	-0.168773744	-0.346724613	-0.011060947	-0.623434568	-0.050030934	0.116893751	0.344652969	-0.201749054	-0.232562773	-0.387281438	0.435412184	-0.228910146	-0.463942038	-0.066139803	-0.253731633	0.422977533	0.130150684	NA	-0.401821753	0.177225259	-0.829196025	0.313715249	-0.636010989	1.371637472	0.001698557	-0.600750331
19	-0.726083681	0.283523437	0.639377137	0.17580034	NA	0.002397125	-0.398688124	-1.166034965	0.234755867	0.380284043	-1.129483952	-1.10714862	NA	-0.150009267	0.102195512	-1.359847191	NA	0.709512535	3.188457854	0.01222497	-0.009040745	-0.359106469	-0.115859886	NA	-0.254634218	-0.622688717	-0.483696956	0.00548493	0.222583394	0.03758476	-0.534947566	-0.059962341	-0.897714346	-1.022206957	-0.072678225	0.507901352	0.123279016	2.468929695	0.234676787	-0.036767724	NA	-0.364563117	-0.198085152	-1.071775635	0.052402679	-0.926846246	-0.110149744	-0.70623242	NA
20	-0.28143496	-0.733136189	0.12777737	0.295278149	NA	-0.54697107	-0.575897621	NA	-0.305438794	-0.791201121	-1.00103196	0.0303352	-0.12363764	-0.46140074	-0.153034636	-0.374984401	0.026349775	0.714125587	0.863606998	-0.145603974	-0.350125013	0.002995509	-0.452556716	NA	NA	-0.494296322	-0.548700576	0.181654668	0.271552691	-0.225396086	-0.266051052	-0.297463084	-0.421442063	-0.184644252	-0.18428348	-1.251064412	-0.032316601	1.903435003	-0.122167634	-0.03759803	NA	0.044686518	-0.2953111	-0.355104749	-0.332400537	-0.963382339	-1.276543497	-0.657394011	-0.14792013
21	-0.099268002	0.312911126	0.969528135	NA	NA	-0.361400377	-0.426025022	-0.049610501	-0.243856593	NA	-0.062194604	0.261440761	NA	-0.475780282	0.261979575	-3.160606917	NA	-0.182601596	-0.003205131	-0.454917992	-0.283026261	-0.448476999	-0.186932169	0.095128345	-0.148848097	-0.212698293	-0.253731633	-0.110596421	0.103819329	-0.076341233	-0.195771605	NA	0.128744956	NA	-0.691348799	-0.276148837	0.258819528	-0.367447041	0.296988632	0.051928093	0.33497111	-0.256312613	0.069805874	-0.527971783	-0.420527986	-0.349841204	0.512404377	NA	NA
22	-0.324207754	-0.221145549	-0.367735891	-0.244494877	NA	-0.282230294	-0.237749704	-1.096015663	NA	-0.0927734	-0.722988023	-0.451456692	0.058740495	-0.129767058	-0.569868164	-0.511325749	0.136713823	0.582662447	1.041830275	-0.766363243	-0.517514612	-0.203095856	-0.297463084	-0.316904931	-0.04845522	-0.120925468	-1.050679635	-0.231049723	-0.057629113	0.109750864	-0.781541331	0.003095205	-0.393931872	-0.063792133	-0.430167721	0.134793096	0.078256498	1.85979188	0.349599975	-0.105471633	NA	-0.15431736	-0.243346259	-0.720518377	-0.095520202	NA	-0.191887162	NA	NA
23	-0.074615793	-0.354106816	0.744695442	0.070365263	-0.379066634	-0.293163736	-0.236735505	-0.892818376	-0.103917113	0.481870439	-0.293968457	3.429350666	0.280581926	-0.8603831	0.408792898	0.01400152	0.126808847	0.457551421	0.360258515	-0.397943467	-0.170788321	0.403997365	-0.006521217	-0.473529839	0.345998149	-0.214927397	0.162373919	0.288931292	-0.17304472	0.243730185	-0.249359198	0.148764773	-0.298406036	-0.975775379	0.200161475	0.526265808	-0.001701447	1.345003507	-0.08762975	0.089566443	NA	-0.098164249	-0.079584479	0.214788747	-0.049715592	-1.201309687	0.784586241	-0.639606414	NA
24	-0.010555514	-0.31525884	-0.076557123	0.211556682	-0.32892082	-0.188379871	-0.026960182	0.064944689	-0.078177781	-0.410527902	-0.608989873	-0.005113049	-0.176021444	-0.457916968	-0.014301785	-0.301240237	-0.123524486	0.253168264	0.585060731	-0.062833309	0.015774919	-0.272465107	-0.13250335	0.017348638	0.140109708	-0.616741849	-0.378920553	-0.174591511	-0.52239226	0.193920693	-0.41581852	-0.702793558	-0.40917197	-0.052978925	0.004191205	-0.621198681	0.154007812	2.106022614	-0.186932169	-0.10491617	NA	0.105350516	-0.269842154	-1.417578651	0.162968828	-0.596565083	-0.763140552	-0.201504376	-0.90017135
25	0.151346752	-0.021223636	0.08204071	0.659176661	NA	-0.234710188	0.372804166	-0.180802711	-0.41521246	-0.366004039	0.247484883	-0.175306222	0.691145178	-0.321721565	-0.090909875	-0.544899604	0.503801009	0.340108475	0.377682727	-0.124883182	-0.125563223	-0.003907625	-0.295579845	NA	0.034304804	0.543370255	0.013311014	-0.341786331	0.073529233	0.282770028	-0.314847741	-0.335612606	-0.208870892	-0.025215249	0.762766522	-0.514164525	-0.198816859	-0.066246646	0.012521281	0.270332434	NA	0.407795723	-0.117770536	0.005982072	-0.248461359	0.092852617	-0.171025597	0.547832349	0.424221437
26	-0.584651584	-0.16629074	-1.18678798	-0.202728367	NA	-0.048140375	0.24912314	0.452348694	-0.021836695	-0.311291938	0.120977927	2.724304055	NA	-0.170432512	0.230238324	0.606335784	-0.363987329	0.187557824	0.651491505	-0.711107506	0.431327768	0.192354392	-0.067422676	0.123544186	-0.282760868	0.221301856	-0.005113049	-0.061237309	-0.238891908	0.047741996	0.104810364	-0.820298966	-0.179485582	NA	-0.113392687	0.685770036	-0.020713042	0.762440007	0.148592404	-0.291957867	-0.502196297	0.003593536	0.173112618	-0.158526908	0.312106356	-0.877791433	-0.144216851	-0.268664067	NA
27	0.31903538	-0.545762194	-0.634689611	-0.75162411	-0.724637848	0.441668453	-0.751412089	0.108675017	0.152205933	-0.504181081	-0.039364724	-1.666537504	0.279599496	NA	0.108764715	-0.315670109	NA	-0.215175382	0.05287704	-0.45870767	0.193261497	-0.154084015	-0.511826124	-0.117545564	-0.037701867	-1.110482461	-0.171381617	-0.011667805	-0.349841204	-0.010050336	0.012817504	NA	-0.301105093	-0.223643676	0.362696776	0.038739828	0.685518153	0.612208238	0.045833416	-0.186570571	NA	-0.680823431	0.001199281	-0.032419891	0.118227381	NA	-0.494624244	-0.243346259	NA
28	-0.050767117	0.321358599	1.017944386	0.005683816	NA	-0.012578782	-0.846997905	-0.229538958	-0.368892128	-0.228030473	0.059965581	-0.894284652	0.171092075	-1.274395269	0.124339274	-0.479650006	0.01439588	0.538129458	0.155121637	-0.683989243	-0.14387037	-0.463465052	-0.087738914	-0.666310527	-0.10402807	-0.560015868	-0.108476476	-0.334913452	-0.081318521	0.308219724	-0.469363834	0.102737077	-0.587346762	-0.472566912	-0.066139803	-0.225270812	0.173953307	1.479875775	-0.245261357	-0.054456186	0.402460599	0.225620481	-0.094640404	0.068499416	0.091758425	-0.716620537	-0.419614744	-0.193948893	NA
29	0	-0.220023424	0.762020045	0.069339478	NA	-0.347290544	0.138369669	0.017741681	NA	-0.488738027	-0.852142912	1.700155745	NA	-0.522223669	0.233252285	-0.824167443	-0.111155049	0.149798365	-0.079909383	-0.340379861	0.105620482	-0.433247489	-0.271939966	-0.112385131	0.031789322	-0.379797361	-0.285018955	-0.370339306	-0.379943571	0.00796817	-0.281567471	NA	-0.536656384	-0.504346658	0.512104805	0.979340646	-0.37571215	0.352907857	-0.170432512	0.052497569	NA	-0.310200384	-0.249359198	NA	-0.261494643	NA	-0.227277083	NA	NA
30	-0.64207391	-0.753109522	-0.682405084	-0.024702613	NA	-0.223393583	-0.302592685	-0.472406514	-1.05010788	0.002995509	-0.598200703	-0.806315879	-0.3137523	-0.423120043	-0.501370465	-0.752260445	-0.297867098	0.292072421	0.444814018	-0.396009949	-0.531538665	-0.066887946	-0.201749054	-0.36658099	-0.224269185	-0.358390701	-0.523742016	-0.14317777	-0.182841692	-0.105582763	-0.336312249	-0.40107476	-0.675110818	-0.115859886	-0.517850239	0.715446688	0.360886065	1.768217861	-0.085122253	-0.203340924	NA	-0.824623543	-0.288882793	NA	0.310274921	-0.785043195	-0.636766847	-0.869884359	NA
31	0.207583113	-1.446044366	1.283015012	-0.466170983	NA	-0.722370039	-1.210326278	-0.75162411	0.01439588	NA	-0.891354247	0.062974799	NA	-0.83632495	-0.173401459	0.873758943	-0.492494667	-0.193827497	-0.208994128	-0.095520202	-0.538539462	0.356344889	-0.619339253	NA	-0.660486398	-0.570929548	-0.513328754	-0.220896079	-0.065178726	-0.02040681	-0.408870901	-0.379797361	-0.854490331	-0.217037233	-0.250129416	-1.037046933	-0.123071998	-1.190727578	0.207583113	-0.121151202	0.746308729	0.611611693	-0.503022812	-0.148268017	-1.012801632	NA	0.223143551	-0.808782524	NA
32	-1.263369014	-0.845832268	1.194376911	-0.062194604	NA	-0.553733125	-0.713145827	-0.802962047	NA	NA	-0.527293816	-0.116870952	-0.371498559	0.011434378	-0.15665381	-0.291823972	-0.023166278	0.608405952	0.390148404	-0.843272639	-0.801400766	-0.230168166	-0.223643676	-0.865597618	0	-0.29410264	-0.402868482	-0.538025544	0.152721087	0.101382614	-0.66650525	-0.433710274	-0.730226189	NA	-0.72815279	-0.71070034	-0.096621039	0.97455964	0.032273561	-0.162636583	NA	-0.002202424	-0.323516525	NA	-0.48240015	-1.23031678	0.493170689	-1.920729851	-0.699769057
33	0.01597177	-0.885519073	-0.309927681	0.115825566	NA	-0.758005753	-0.21319322	-0.773489933	-0.205058084	0.140718007	-0.93828075	-0.356246464	-0.14618251	-0.868930161	0	-0.673148494	0.094127663	-0.366292473	1.240690387	0.395953348	-0.129880921	-0.370484139	-0.021223636	-0.712126147	-0.408720401	-0.825764705	-0.046986791	-0.126470664	0.230873597	0.111451925	-0.638090975	0.546733162	-0.348281695	0.276949686	0.054866901	0.618261983	-0.297463084	-1.480605041	0.008860628	-0.083925235	-0.094420576	-0.217658621	-0.037390389	-0.601845022	-0.020610954	NA	-1.21773372	0.014790085	NA
34	0.348047837	-0.50120538	-0.02850236	-0.98564081	NA	-0.022756987	-0.502692124	-0.205426431	-0.63544447	NA	-1.07382212	0.128744956	0.124515875	0.330166684	-0.370194494	-0.958937307	NA	-0.88140633	-0.009848336	-0.356960699	-0.41521246	-0.242963679	-0.036352829	-0.647218249	-0.085557888	-0.95010608	-0.007226045	-0.454917992	-0.068385913	0.207258042	-0.40947313	-0.392450171	0.43728672	-0.391858105	-0.677077	0.564688614	-0.101479169	-1.000759889	0.063350316	-0.004912044	-0.691149178	-0.387428746	0.057513906	-0.829196025	0.155207264	-1.05010788	NA	0.072971612	-0.979763155
35	0.19334392	0.016168581	0.103188158	NA	-0.268402458	-0.12397718	-0.113504701	NA	-0.344887546	-0.131818575	-1.773134005	0.368870278	NA	NA	0.072413681	-0.156069186	NA	-0.182721637	0.015676479	-0.312384685	-0.516508407	-0.624741148	0.072506691	-0.526447005	-0.063472423	-1.069150579	-0.461242124	-0.603855073	-0.458865885	0.267581401	-0.497251504	-0.500050551	-0.160873226	-0.622129693	0.489561128	0.081487817	-0.114177045	-0.07709705	-0.514833645	-0.039676817	-0.289951312	0.33088523	-0.242963679	-0.705219762	-0.37775267	-1.16315081	-0.844435295	-1.357901287	NA
36	-0.038429027	-0.144216851	-0.013389237	-0.336592244	NA	-0.186570571	-0.413698913	0.004390348	NA	0.156234222	-0.71233	-0.438039954	0.146521653	-0.284885985	0.372941916	-0.095520202	-0.398837122	0.332607636	0.153836345	-0.572523738	-0.164285194	-0.121264087	-0.04447449	-1.196666229	-0.528310938	-0.422204432	-0.287948775	0.148333795	0.152120048	0.151690513	-0.499061757	-0.444569828	-0.122732765	0.26589648	-1.024711481	-0.887217484	-0.104694071	1.529593518	-0.183922838	-0.167708844	NA	-0.647027245	-0.110596421	-0.089049817	0.03449804	-1.056127677	-0.194920592	-1.505077897	NA
37	-0.169602784	0.008067371	0.080842388	NA	-0.008132983	-0.420527986	0.065881369	NA	-0.09244429	0.31990722	-1.462311848	-1.118100965	-0.103362513	-0.263965546	0.070272053	-0.371063681	NA	0.246078523	-0.082512422	-0.087520598	-0.292627615	-0.045311223	-0.025933382	-0.112161367	-0.01440323	-0.350266948	-0.519530064	-0.144447904	0.341744031	-0.107139876	-0.523742016	-0.074184898	0.005584378	-0.210844496	-0.112385131	0.210341959	-0.269842154	1.096777273	0.172439557	-0.135361638	NA	-0.605136303	0.045546815	NA	-0.259418607	-0.146993024	-0.262924421	NA	NA
38	-0.719285838	-0.115410852	-0.108030744	NA	NA	-0.229413164	-0.315533001	0.662275517	-0.064218572	NA	-0.187897071	-0.007729798	NA	-0.709683149	-0.47868117	-0.390675023	NA	0.164072722	0.430937904	-0.4547604	-0.331842968	-0.18224156	-0.391414285	0.005982072	-0.354391838	-0.330589573	-0.415515444	-0.149196306	-0.015113638	0.023814178	-0.509826123	NA	-0.299754654	-0.620268535	0.126103877	0.323531725	-0.365427421	1.791892794	-0.127833372	-0.088066479	0.128129328	0.549796306	-0.09783336	-0.17542539	-0.211956362	-1.00103196	-0.464578373	NA	-0.863935502
39	0.309834877	-0.830113036	-1.058430499	-0.188259149	-0.349841204	-0.31814128	0.201225087	-0.23079777	-0.066353501	0.57120551	-0.509160344	-0.315395911	0.492743116	1.516532838	-0.093651556	-0.452871231	-0.408419468	-0.354676941	0.064100925	-0.236482116	-0.45082865	0.058268908	-0.004811557	-0.106027405	0.129096573	-0.057735051	0.022250609	-0.057311367	-0.222518747	-0.408118626	-0.324346057	0.577062702	-0.287148881	0.009356095	-0.154784214	-0.213936071	-0.03035612	-0.174472442	-0.223143551	0	NA	NA	-0.032523192	NA	-0.377315065	NA	-0.193706116	NA	NA
40	0.075571187	-0.137654165	0.354382318	0.350445582	NA	-0.663588378	0.020978406	-0.2749633	0	0.169151883	0.013409687	0.623475507	0.062129371	-0.084686808	0.025765208	-0.779140894	0.129975076	-0.329615796	0.022934971	-0.300294611	0.09803374	-0.162166051	-0.017247893	0.142800799	0.070738015	-0.776528789	-0.335193055	-0.056358734	-0.039156715	0.179818427	-0.296521021	0.42963726	-0.346441768	0	-0.447381451	0.992584884	-2.591601388	-0.568454737	-0.145488307	-0.003807238	NA	0.416998344	0.070458464	0.062129371	0.408659999	-0.334354481	0.719837796	NA	NA
41	-0.858493633	-0.057629113	0.12830526	0.413168692	NA	-0.323378337	-0.228281729	-0.294908118	NA	0.051928093	-0.649321701	NA	NA	0.117516333	-0.106361016	0.319471395	0.3472002	0.454382248	0.326638328	-0.473690417	-0.035938107	-0.063685552	-0.135819723	-0.457442847	NA	-0.37775267	-0.266312047	0.097671027	0.141239112	0.084616846	-0.397199364	-0.100151882	0.210585022	-0.564402225	-0.339817827	-0.094640404	0.078071535	-0.348140041	-0.052662653	-0.197597644	-0.535459905	-0.056041391	-0.201137471	0.06325645	-0.293297811	-0.402718882	-0.63714499	-0.636388847	NA
42	-0.317179543	-0.088394151	0.957240718	NA	-0.445350042	-0.273647683	-1.173766962	-0.019794627	NA	-0.17757285	-0.272990524	0	0.090936995	1.522571979	0.307411168	0.368801124	NA	0.192189376	0.23948923	-0.544899604	-0.409925039	0.420288037	-0.09145761	-0.003907625	NA	0.238386781	-0.956331781	-0.12806067	0.693297169	0.331316109	0.061095099	NA	-0.400626831	0	0.360746643	-0.000500125	0.214546704	-0.217782945	-0.054984308	-0.108253585	0.777304489	0.651752105	-0.419614744	0.138195499	-0.155368087	-0.394673547	0.810530136	-0.942378067	0.545690711
43	-0.262664309	-0.744229971	-0.004610613	0.670134406	NA	-0.420223479	-0.13079229	-0.048770164	-0.208008664	NA	-0.89086668	0.12018016	NA	-0.395712817	-0.14064233	-0.594207233	0.184319559	0.346139642	0.837550509	-0.554081132	-0.358676947	-0.0438474	-0.067957693	-0.845366394	0.231508468	-0.260845418	-0.338414121	-0.086102699	0.448205262	-0.201259758	-0.356246464	-0.124883182	-0.360539545	-0.436646226	-0.082186671	0.15956457	-0.480296419	-0.234330897	0.165938078	-0.07278577	NA	-0.404815319	-0.081426999	-0.384192973	-0.213812224	-1.203972804	-0.129880921	NA	NA
44	-0.258770729	0.286681572	0.220901039	-0.516005684	-0.244750305	-0.348848508	0.24027595	-0.018571386	NA	0.073529233	-0.56651453	4.930053386	NA	-0.580890498	-0.016129382	-1.013077001	NA	0.103909463	0.38369655	-0.920298753	-0.072893326	-0.34969933	-0.427864103	-0.424342164	-0.483372597	-0.275094957	-0.202728367	-0.245644817	-0.128856622	0.265206376	-0.151753555	0.680517764	-0.407066389	-0.055724149	-0.197597644	-0.001300846	-0.067422676	0.231032353	0.240118656	0.138804963	0.59531382	0.665519013	-0.181761714	0.170417652	-0.198938863	-1.035919219	NA	-0.287015628	NA
45	-0.162048452	0.045546815	0.681378197	0.05088321	NA	-0.467766134	-0.492494667	-0.007226045	0.002097798	-0.387281438	-0.837017551	0.25588176	0.073157521	-0.426484475	-0.124769887	-0.491022996	0.046119936	-0.32489946	-0.055195635	-0.42617815	-0.192978137	-0.235848924	-0.330450404	-0.58411342	-0.512493681	-0.238384101	-0.428938464	-0.189225333	-0.892574205	0.11867153	-0.646454453	-0.333656205	-0.683791086	-0.348565061	-0.002904213	0.649665402	-0.058158914	0.027906953	-0.586088108	-0.217534313	NA	NA	-0.295579845	-0.913295223	-0.603672174	NA	NA	-0.464896692	NA
46	0.39501065	-0.092334611	-0.652197194	0.470878247	-0.436336772	-0.252186237	0.084984324	0.674321076	0.152205933	NA	0.14660802	-0.742967876	NA	-0.219027036	-0.187052731	-0.923567141	1.629809006	0.046024438	-0.108699417	-0.13079229	-0.300294611	-0.573765424	-0.51266064	0.00059982	-0.10491617	0.187557824	-0.216292076	-0.278524135	-0.008838949	0.056758334	0.251225535	NA	-0.175067928	-0.962596485	-0.641503947	0.284050486	0.203104096	1.103566662	0.023716527	0.089383561	NA	-0.694548161	-0.228784431	-0.578212642	-0.559315833	-0.023268627	-0.4405225	-0.310064023	NA
47	0.204083049	0.332679338	0.348047837	-0.07396952	-0.565809932	-0.60477007	-0.014200349	-0.557742544	0.075478461	NA	-0.738772359	0.740793834	NA	-0.114064956	0.179066264	-0.796287939	NA	-0.233446444	-0.582321625	NA	0.201960772	0.297137231	0.216159218	-0.347856795	-0.071818288	-0.368892128	-0.203095856	0.094036642	-0.446599651	0.423959691	-0.376294731	-0.179724931	-0.493476985	0.586285539	-0.082186671	0.601744357	-0.174353387	-0.035523556	-0.155484903	-0.067315707	-0.664948526	0.351149708	0.324688798	0.280884018	0.37788834	-0.951399909	-0.253731633	-0.762282919	-0.758859724
48	0.05088321	0.467124488	0.769552512	-0.23079777	NA	-0.176498543	-0.185005154	-0.917541514	0.503680156	-0.223143551	-0.003104815	-0.710496819	-0.178528759	0.17050198	0.075107472	-0.80833359	-0.219027036	-0.903127745	-0.569691377	-0.661648514	0	-0.215423428	-0.248461359	-0.17840922	-0.298540816	0	-0.674914412	-0.137309951	-0.356960699	0.297211523	-0.352113933	-0.946234608	-0.093541744	0.023032699	0.134443477	-0.545072062	0.35942117	-1.135068826	0.119559235	-0.064111945	-1.413460029	-1.167962367	0.054298773	NA	-0.218529214	NA	-1.178305058	-0.228156093	NA
49	0.243259855	0.243103029	-0.277071893	1.282710045	-0.512827626	-0.247820539	0.324327357	-0.154900961	0.17008027	-0.334633927	0.84303163	0.222983539	0.656690644	-0.096951526	-0.228156093	0.927349359	1.650099894	0.211637611	1.004045166	-0.200159715	0.022739487	-0.258770729	0.036621183	0.002796087	0.445582855	1.392574599	-0.642834367	-0.398688124	0.003194891	-0.031077956	0.169573984	0.449864695	-0.207270202	-1.831332244	0.193673545	-0.02583076	0.024399887	0.051168287	-0.097943644	0.09531018	NA	-0.276544328	-0.141102841	-0.035419945	-0.026241311	-0.108365025	0.266662705	-0.732719956	0.003593536
50	0.065319466	-0.070207895	-0.119234088	0.77246655	NA	-0.359249684	0.494513298	-0.483696956	-0.080667903	0.181988168	-0.096180558	-0.223393583	0.252236226	-0.411885676	0.004788517	-0.513830133	0.960116211	0.695743806	0.471252849	0.068779515	0.494025285	-0.001501126	0.303801454	-0.019488677	0.067565186	0.500411585	-0.213936071	0.000899595	0.37973696	0.138717919	-0.341645595	-0.01959065	0.102195512	0.56377854	-1.016111067	-0.379358861	-0.01136433	1.332682592	-0.036352829	-0.064965279	NA	-0.063365876	-0.110931561	-0.068921445	0.079457921	-0.572701027	-0.681416258	1.288709095	NA
51	0.104630249	-0.031800313	-0.99479296	0.202940844	NA	0.389064687	-0.769380487	-1.25351325	0.078071535	-0.515670675	-1.504177402	-0.242071561	1.439052832	-0.773923491	-0.105582763	-0.547835449	-0.147108865	0.123102197	0.220580269	-0.614890683	-0.421442063	0.056569351	-0.267748735	-0.713145827	-0.074831311	-0.579461416	-0.542660347	-0.119234088	-0.130108685	-0.003706862	-0.54697107	NA	-0.199427025	-0.250643225	-0.276808076	0.182404887	0.118493894	2.230175677	0.058834786	0.11439954	NA	0.310934624	-0.375275437	-0.633746837	-0.163460549	-0.759500681	NA	-0.227402608	NA
52	0.385194371	-0.125223145	-0.002603386	-0.207270202	NA	-0.404965233	-0.048035449	-0.024395157	-0.064538521	0.182404887	-0.051503843	0.007174204	-0.149080223	-1.180581852	-0.105138318	-0.733969175	-0.095630231	0.007472015	-0.00471108	-0.747392195	-0.459182391	-0.491840324	-0.317728994	-0.510492346	-0.224895084	0.352556475	-0.680033541	-0.447068658	-0.018571386	-0.481266822	-0.557218663	-0.648556297	-0.378482437	-0.001801622	-0.419158435	-0.105027238	-1.139121832	0.155635292	0.580258398	0.21985816	0.077053629	0.47318606	-0.191766016	-0.458391314	-0.745704431	NA	-0.339817827	-0.379066634	NA
53	0.301437038	0.186562551	0.001598721	0.078256498	NA	-0.269580237	-0.317316878	-0.466011608	-0.393042588	NA	-0.434482057	-0.591854929	-0.200648473	NA	-0.001100605	-0.074184898	0.043538302	0.123013776	-0.038429027	-0.157472859	0.066723632	0.031595562	0	-0.040717833	-0.051819749	0.074086543	-0.104472022	0.175129086	0.244200294	0.149195566	0.026836654	-0.296924654	-0.102586589	0	0.016857117	0.522062256	0.167461694	-0.384192973	-0.005917474	0.122483084	-0.89452924	-0.284221401	-0.006521217	0.424090572	-0.07396952	0.216320326	-0.526955006	-0.523235644	-0.044892769
54	0.266969031	0.415943352	0.114577905	-0.31429987	NA	-0.068492996	-0.01501212	-0.162166051	-0.012781334	NA	-0.13857265	0.539529692	-0.299484785	0.386418195	-0.173520401	-0.840951375	-1.580850456	-0.250514748	0.03237038	-0.235342659	-0.030149977	0.101292251	-0.003506139	-0.072140678	0.163563384	0.368316912	0.161948767	0.115380151	0.251458862	0.078718755	-0.126697653	0.190372395	0.20546826	0.23791393	0.251303317	-0.116421463	-0.076233306	-0.688756832	0.208395329	0.175129086	-0.440211844	0.12892078	0.230635417	0.312033163	-0.086975014	-0.179964337	0.380284043	-0.190555362	-0.352540645
55	-0.385515433	-0.145719654	-0.218404797	0.031789322	NA	-0.353109878	-0.613596902	-0.282760868	0.241454871	0.332249046	-0.575541938	-0.486458267	-0.254376254	NA	-0.143408583	0.028781801	-0.304353607	0.05619128	0.056474847	-0.327393573	-0.124543335	-0.162401289	-0.035523556	-0.109145447	-0.433247489	-0.319654452	-0.24028971	0.035270614	-0.237115709	-0.376149054	0.23483494	0.540927968	-0.478358434	-0.504181081	-0.220023424	0.910192173	-0.246028424	0.599715236	-0.071603419	0.004788517	NA	0.085168012	0.075663904	-0.266181541	0.289455499	-0.488738027	-0.835171681	-0.187173308	NA
56	-0.201015199	0.018919885	0.22872793	-0.484508315	NA	0.097761718	-0.346017649	0.722560341	-0.305031711	-0.28103753	0.625350022	-0.405265128	-0.356246464	-0.685972977	0.099664323	0.187640718	-0.644166558	-0.792746546	0.39102806	1.177238609	0.239646623	0.064100925	-0.067529657	-0.360109406	-0.183201944	0.087552897	-0.044683608	-0.028296599	-0.33477368	-0.024497632	0.04449524	-0.228407381	-0.569337895	NA	-0.370484139	0.00039992	-3.083471188	0.989020612	-0.393931872	0.089200645	-0.366292473	-0.275885263	0.221942831	-0.3878708	0.173701175	-0.353537015	0	0.121066528	NA
57	-0.004409708	0.971119768	0.667778089	0.325844534	-0.198572897	-0.341645595	-0.178528759	-0.007226045	0.056852812	-0.01959065	0.280204183	-0.991822794	0.051738195	0.338185055	-0.171262929	-0.300564698	0.137324191	0.251536626	1.026650729	0.301584978	-0.273779167	0.009058844	-0.127606125	0.051168287	0.233331478	0.434505977	-0.226524259	0.120623442	-0.088612658	0.231667122	-0.004008021	0.180903886	0.015873349	-0.032626503	-0.118783536	1.067121622	-0.309518767	0.86802443	-0.245644817	0.160927664	NA	-0.066139803	-0.174591511	0.14496577	-0.251800261	0.058740495	-0.419158435	-0.502196297	NA
58	0.104720311	0.176051944	0.574082073	0.14617611	NA	-0.135247149	-0.048560191	-0.000900405	0.186562551	NA	-0.026754737	-0.943405024	-0.178289696	0.314591738	0.129887261	-0.152918106	NA	-0.139032209	0.556353329	-0.167590592	0.285028555	-0.272202502	-0.0329365	-0.249615872	0.01597177	0.434311683	-0.0438474	-0.175067928	0.23956793	0.175632569	0.045068963	-0.926593625	0.035077527	-0.144910172	0.194826378	0.187640718	-0.514499029	0.142107017	-0.157824085	-0.00080032	-0.423425433	0.057891478	0.188386461	-0.029943876	0.002995509	-0.056464537	-0.410829471	-0.339115728	NA
59	0.036813973	0.156234222	0.839971085	-0.327116142	-0.244750305	-0.171144256	0.414490919	NA	-0.248974311	NA	-0.330172124	-0.044892769	1.086910759	NA	0.071017487	NA	-0.403467105	0.146867076	-0.683791086	-0.215423428	-0.089815304	-0.167827111	-0.196258223	-0.05234648	-0.129425547	-0.1889837	-0.10458304	-0.259418607	0.454064778	-0.135705182	-0.017146159	NA	0.333181113	0.255572019	-0.072355662	1.175418997	-0.18224156	0.051358292	0.586563695	0.092123289	-0.459974094	0.452730301	0.062035391	0.480325178	-0.116983355	-0.248846049	0.598561738	-1.325763861	-0.041134543
60	-0.139377016	0.059965581	-0.21035073	-0.310746012	NA	-0.270235159	-0.163225061	-0.037494204	NA	-0.379358861	0.141239112	-1.000215967	-0.109145447	-0.593120866	0.157003749	0.255726901	-0.019080888	0.759917584	0.792947266	0.2908022	0.024790169	-0.352825221	0.126456424	-0.042490052	NA	-0.008939842	-0.116533816	-0.26918749	0.011730923	0.10399959	0.015873349	-0.269056608	-0.394080163	-0.188017749	NA	0.636841344	-0.194556094	0.645898328	-0.228910146	-0.07396952	NA	-0.551821244	0.127601345	-0.065605757	0.15495036	-0.499226488	-0.096180558	-0.29021862	NA
61	0.30069701	-0.240544066	-1.222136775	NA	-0.411885676	-0.110708122	0.076590602	-0.085448962	-0.075909594	-0.079151438	-0.073538903	0.808571882	0.1434941	-0.147108865	0.333037774	0.138195499	NA	-0.66650525	0.259359755	-0.218529214	0.004987542	-0.304760414	-0.031077956	-0.381406843	0.106160196	-0.125223145	-0.229161624	-0.312521362	-0.492331041	0.124339274	-0.058901108	-0.098164249	-0.230168166	0.250135956	-0.562294372	0.142367241	-2.900422094	-0.105693905	-0.158409737	0.071389996	-0.125336491	0.459827023	0.110198792	0.089475006	-0.043742923	-0.474172306	NA	-0.253216236	NA
62	-0.258641204	0.066349381	0.169236317	NA	NA	-0.795622972	0.373355054	-0.145488307	-0.185005154	-0.031077956	0.070272053	0.742746541	-0.126357189	NA	0.081764302	-0.764213629	NA	0.291250697	0.179901965	0.182821432	0.690894646	-0.384486702	-0.05108279	-0.598746505	NA	0.595920165	-0.041864204	-0.258641204	-0.635633274	0.061471322	0.159308782	-0.497744884	-0.082621029	-0.372368881	0.455714525	-0.063046302	-0.173282532	-0.439435628	-0.012882626	-0.224394333	-0.746969987	0.002596626	-0.191039447	-0.535459905	-0.355390055	-0.068707198	0.433339645	0.06325645	0.43502391
63	0.360467742	0.200652513	-1.123622452	0.592829484	NA	0.551122681	0.290428298	-0.669430654	0.100297721	0.6590732	-0.004008021	0.330310435	NA	NA	0.251614383	0.065787741	0.87455165	0.178229864	1.178531912	0.11716062	0.731261513	0.076220026	-0.296790091	-0.182721637	-0.309382499	0.34344785	0.331100693	0.080011938	-0.317454231	0.365614864	0.02166364	NA	-0.479165471	-0.266964831	0.320125061	0.391230948	-0.115747609	0.522002924	0.005982072	0.204409153	NA	NA	0.202695916	0.413300994	-0.029531803	-0.476585241	-0.288615842	-0.071173819	NA
64	0.235467301	-0.298540816	-0.343194782	NA	NA	-0.309927681	-0.714983875	-0.182841692	NA	NA	-0.437265421	1.175141138	-0.396753168	-0.789437841	-0.024907636	-0.357103607	-0.622875128	-0.894284652	-0.082295243	-0.352113933	-0.274042187	-0.530178352	-0.151869949	-0.383312303	-0.589868831	-0.059643853	-0.428017513	-0.37775267	-0.802515718	0.070458464	-0.423730917	-0.971010944	-0.655273528	-0.466968241	-0.329476762	-0.748871329	-0.132845913	-0.370773868	-0.91904452	-0.118108088	NA	NA	-0.030459207	NA	-0.383312303	NA	-0.655466114	-0.247692424	NA
65	0.186811462	-0.05551271	-0.197110374	0.180403051	0.215756333	0.686072212	0.322880283	-0.173758326	-0.180323554	-0.362693016	0.151690513	1.062812385	-0.040926167	-0.249487527	0.049837235	-0.196014884	0.121066528	0.348683094	0.412837862	-0.055195635	0	0.065132095	-0.120023043	-0.100815305	0.056285811	-0.080126044	-0.005615739	0.144100344	-0.003004509	0.165853364	0.113239396	-0.125790006	-0.263705163	0.350304697	-0.100925919	0.631271777	-0.230042293	-0.563172104	-0.158526908	0.021957167	NA	0.006379607	0.080565648	-0.034591445	0.615672007	0.123809286	0.121332285	NA	-0.22589734
66	-0.765717873	-0.100925919	-1.054691102	-0.783071888	0.244513577	-0.194191729	0.588508626	-0.265920581	-0.074508052	0.29050309	0.38390093	-1.116267224	NA	0.342525308	-0.129311736	0.171344866	NA	-0.215051381	-0.10402807	0.078533878	0.234360407	-0.193584749	0.090663035	-0.016129382	-0.077853439	0.258510695	-0.041342964	-0.113840816	-0.147688273	-0.003706862	-0.04103035	0.387504783	-0.325037859	0.384786097	-0.388165611	0.194744077	-0.120699785	-0.09530018	0.044303926	0.016758784	0.610471844	0.269110687	0.243103029	0.061283228	0.170248976	0	-0.489553488	NA	NA
67	0.464425601	0.078071535	0.433145124	-0.52915933	-0.275094957	-0.203953857	-0.740238788	-0.298271274	-0.886246611	-0.295579845	-0.818483672	0.986749196	NA	0.042580448	0.148247576	-0.847931394	-0.05234648	0.316998127	0.2059567	-0.329059777	0.050312814	0.008464078	0.008166563	-0.260715624	0.280959527	0.0428679	-0.093871216	-0.217658621	0.296022197	0.206688913	-0.225145554	NA	-0.374838915	-0.293700145	0	-0.194799078	0.329807218	0.973804638	-0.19309943	0	-0.6003857	-0.161578196	-0.188742125	-0.646836278	0.06241126	NA	-0.0438474	-0.394228476	NA
68	0.272390754	0.359141899	NA	0.292669614	-0.06720875	-0.183081846	-0.909811766	-0.626984978	0.219617342	-0.208378099	-0.20911738	0.97731057	-0.122167634	0.340108475	0.01242252	-0.540082805	0.730346622	0.3654761	0.468502503	-1.002120988	-0.467606505	0.10625012	0.328152005	-0.243984217	0.355223892	0.270713924	-0.196988594	0.067845547	0.264208716	-0.03035612	-0.432322562	0.216159218	-0.420832585	0.056474847	0.05088321	0.515514613	-0.130678324	0.177727688	0.301584978	0.424940885	0.811152414	0.428790933	-0.107139876	-1.231344001	-0.025420377	NA	1.001624035	-0.3074767	NA
69	0.271247766	0.453747207	1.103201741	NA	-0.298945265	0.16509062	0.367278527	0.236730825	NA	NA	0.966641582	0.016660441	0.282393111	-0.336872317	0.231587798	0.382946797	NA	0.383628413	0.159905518	0.224902004	0.792358831	0.306749135	0.274140802	0.639113292	0.269645385	0.213739471	0.287432041	0.574926549	0.845138388	0.250369538	0.068499416	-0.204567166	0.152034156	0.101653654	0.44603107	1.422119894	-0.203340924	0.075663904	0.762393353	0.207989304	0.165005835	0.435606265	0.336329369	-0.040405415	0.187226176	0.132430787	0.330741562	-0.279317156	0.689189359
70	-0.07709705	-0.159230226	-0.165936528	0.078071535	NA	-0.41521246	-0.0010005	0.297434364	NA	-0.570752572	-0.278259934	3.089254492	NA	NA	-0.13868752	0.275736001	0.509164244	1.97305272	0.651230837	-0.896243037	0.03237038	-0.152568599	-0.214307703	NA	NA	0.292445708	-0.4547604	-0.251028755	1.198970313	0.035849653	-0.168892136	NA	-0.286882392	-0.249615872	0.486368983	-0.042803122	-0.298001805	2.258831723	0.314226628	0.055245474	0.112524791	1.019785508	-0.204199135	-0.856136809	-0.217410019	-0.927098931	NA	-0.381992752	-0.608438453
71	0.612533477	0.875135348	0.248889268	-0.846531487	0.108405874	-0.621384814	-0.199182914	0.006379607	-0.009242581	0.395078015	0.667624223	-0.316767653	0.253168264	0.383560273	-0.035938107	-1.559220196	-1.042988385	-0.148500008	-0.069671673	-0.518857795	0.225939639	-0.023678127	0.081211255	0.360886065	0.117605242	0.950537557	-0.041551427	0.020096702	0.206200831	0.039413002	0.095946341	0.717937349	0.084800602	0.194003062	0.337757125	0.782987885	0.457614702	0.172944395	0.551641218	0.408726451	1.695248569	0.477289523	0.333252774	-0.376149054	-0.385956642	-0.047615854	NA	0.155378497	NA
72	-0.052557251	0.489928798	0.575545378	0.567016903	-0.26918749	-0.139262067	-1.157407335	0.162883863	-0.011768984	NA	0.121420855	-0.697757793	NA	0.158882325	0.218573123	0.964814194	0.389809868	0.396087946	2.614186308	0.28720696	0.310421559	0.192354392	-0.322135501	-0.279184942	0.086361166	0.465430689	0.132693542	0.009950331	-0.323792959	0.007273484	0.307705264	-0.457916968	-0.288348961	-0.674718045	0.139674982	0.248109297	0.250680894	1.924701105	0.023130417	0.046024438	0.549969411	0.428139425	-0.004912044	0.339894944	0.280808504	-0.815314815	-0.216043814	-0.030974804	NA
73	0.548352596	0.842988589	-0.01065658	0.341601914	NA	-0.2569589	0.110915061	-0.454287773	0.066817173	-0.16629074	0.750236148	0.183737221	NA	0.342170258	0.134356052	-0.78329073	0.22570028	0.118316227	-0.28941691	-0.804749357	0.174373387	0.117960798	0.217527813	0.138979027	0.365961688	0.622617414	-0.502196297	0	0.354101636	0.14384057	-0.09805394	0.467563154	-0.080559508	NA	0.842515012	0.871251524	0.025277807	-1.602958946	0.316342413	0.21438531	NA	0.007372754	0.299067017	0.550661532	-0.308293026	0.253478751	0.38390093	NA	NA
74	0.385942442	0.258973908	-0.221020806	0.544473143	0	-0.483859176	-0.087520598	-0.186811622	-0.009646377	0.109123427	2.054354476	0.255494568	-0.300429645	0.245687516	-0.125563223	0.379121133	-0.030149977	-0.15466748	0.050217716	-0.141448364	-0.188017749	-0.250514748	0.204246114	0.327863862	-0.086429728	0.776890724	-0.243601393	-0.107139876	0.471814489	-0.267618041	-0.064111945	0.376104953	-0.250514748	0.073157521	-0.269711187	-0.640175296	0.069805874	-0.721546655	0.272390754	0.288856383	-0.548873691	-0.073216062	-0.070744405	0.173280812	-0.783728559	NA	0.20880119	0.278313322	NA
75	-0.347290544	0.378915773	-0.06240746	NA	NA	-0.42098492	-0.010555514	0.311007898	NA	0.091575943	0.172355392	0.856880373	NA	-0.016841017	0.063068691	-0.128515422	NA	0.400050475	0.17756024	0.097943074	-0.151520808	0.207420591	-0.010454458	-0.059325466	-0.0927734	0.725517561	-0.329059777	-0.200404064	0.088651698	-0.260456086	0.412242092	0.771218716	-0.362980497	0.56104334	-0.968373812	-0.02583076	0.229284656	0.683450318	0.175045148	0.072413681	0.284953353	-0.152918106	0.049837235	-0.610093625	0.071576198	0.502228777	0.019018006	0.226418184	0.250291683
76	0.023032699	-0.114289146	-0.178648311	0.02391182	NA	-0.594569617	-0.585010522	-0.151520808	0.023130417	0.087736114	0.431977203	-0.218404797	0.306160294	NA	-0.086647807	-0.327532317	-0.348423368	-0.319654452	0.155977581	-0.269449304	-0.237622873	-0.232562773	-0.115859886	-0.18572735	NA	0.408659999	-0.494788246	-0.4674469	-1.278696351	0.079273181	-0.160520927	NA	-0.506169812	-0.598018835	-0.119234088	-0.357675444	-0.159699379	0.819295133	-0.299349877	0.01498713	0.199424465	-0.199793303	-0.165582441	NA	0.058740495	0.131115978	-0.380528623	-0.528819887	-0.539396581
77	-0.2714151	0.165683916	0.405131719	-0.327393573	0.070831181	-0.36686959	-0.333097936	-0.046462874	-0.087957279	0.682541135	0.456538378	-1.193362625	NA	-0.022756987	0.663615378	0.468565095	-0.600021203	-0.206040643	0.413433278	0.533741048	0.295054827	-0.149544637	-0.094090923	-0.381699755	-0.51835389	0.744885376	-0.62735944	0.058740495	-0.46808547	0.059965581	-0.056147161	NA	-0.538882222	-0.393487131	-0.14317777	-0.45413028	-1.055265484	0.192189376	-0.138457793	0.373217361	0.181738053	0.292147089	-0.003305457	NA	-0.20138206	0.542731185	0.197866768	NA	0
78	0.40292856	0.096945206	-0.517514612	1.487451053	0.063538021	0.105260511	0.415877378	0.17889904	0.102105223	-0.560366069	0.1889661	0.081764302	0.199588292	-0.081210055	0.199997742	-1.236151703	0.744505473	0.248187322	1.455353897	-0.357961485	-0.321859524	0.034014879	0.055718489	-0.174353387	0.312033163	0.769274541	-0.157941188	0.05845757	-0.013287894	0.30032679	0.277025492	-0.223393583	-0.071818288	-0.216664585	0.31990722	0.27140024	-1.340174426	-0.252701104	0.223943231	0.220901039	1.335027382	0.360746643	-0.177453425	-0.373239961	-0.186329578	-0.056464537	NA	-0.239654103	NA
79	0.308954208	0.443659654	-1.210326278	NA	-0.564402225	-0.311701578	-0.296252023	-0.947523434	NA	-0.040613683	0.016168581	1.888296169	NA	-0.378482437	0.019312311	-0.898205264	NA	-0.46171805	-0.622316	-0.560366069	-0.141333176	0.060342229	-0.086975014	0.180987334	0.099845335	0.191859261	-0.70623242	0.081211255	0.195073241	-0.02706292	-0.351687402	0.161183038	0	-0.163578314	-0.181162229	0.437545002	0.142800799	-1.098112414	-0.040926167	0.144706221	NA	0.053635549	-0.054033888	-0.356246464	-0.079259681	-0.218404797	NA	-0.004309272	NA
80	NA	0.185898485	0.553367738	-0.254505228	-0.483696956	-0.282628198	-0.596383512	0.16135325	0.124868982	0.093581414	-1.011700917	-0.977102871	0.067004229	-0.730641385	0.046406373	-0.114177045	-0.009343515	0.488273219	0.241769015	-0.50766396	-0.611935925	-0.016739324	-0.181761714	-0.432168491	-0.096731189	-0.301105093	-0.215795614	-0.078610401	0.206688913	0.001299156	-0.203708639	-1.047539018	-0.376586149	-0.651813317	-0.188500608	0.281110527	-0.137654165	2.661768887	0.142107017	0.060153923	0.786364262	0.558701084	-0.408720401	-0.530518257	-0.008536331	-0.724637848	-0.124543335	-1.26655768	NA
81	-0.018265809	0.093399264	0.821936095	NA	NA	-0.285284948	-0.087738914	0.501986675	-0.583037958	-0.404066087	-1.360236827	-0.369760183	-0.236735505	-0.363987329	0.025277807	-1.078221599	0.226099179	0.109571636	0.731838908	-0.260585847	-0.056252942	-0.123298216	0.512224645	NA	0.134880482	-0.965218405	0.221141549	-0.063898726	0.139414056	-0.002904213	-0.384780517	-0.32892082	-0.281965112	-0.384486702	0.27641888	0.031014054	-0.137539414	1.462398554	0.202287569	-0.253087428	NA	-0.257088207	0.03130485	-0.046672408	-0.00020002	-1.506881324	-0.123863987	-0.320894207	NA
82	0.055718489	NA	-0.076557123	0.131729771	NA	-0.201015199	0.298992864	-0.490206337	NA	NA	-0.505838082	0.008265744	0.295650242	0.493353878	0.412043423	0.266203041	0.084984324	0.2038384	0.682743247	-0.240925721	0.574307337	0.156576307	-0.062513905	-0.392154094	-0.144679011	0.134530893	-0.03386707	-0.12397718	-0.376731889	-0.142139767	-0.133645685	-0.238764932	-0.076449172	-0.084795652	-0.364995176	0.303506208	0.158199615	-0.089268468	0.014198719	-0.054350595	-0.349983099	0.284727713	-0.244878043	-0.162518929	-0.121489898	-0.445037883	-0.105138318	-0.612858349	-0.383165601
83	-0.139262067	-0.091567194	-1.058430499	-0.180922536	NA	-0.03386707	-1.027781108	-0.953473523	-0.438349935	-0.475780282	-0.50385001	3.281005196	NA	NA	0.12830526	-0.06272683	NA	-0.043638457	-0.068814316	-0.459815703	-0.108142159	0.024204689	-0.077529203	-0.206040643	-0.013896105	-0.137998498	-0.654118794	-0.483859176	0.375486885	-0.127038233	-0.303540488	-0.50071029	-0.429860265	-0.844202655	0.22154227	-0.552168587	-0.197597644	-0.508162506	-0.06134363	-0.139721943	NA	-0.798952239	-0.142947009	-0.423883694	-0.042594398	-0.316355933	NA	NA	-0.598746505
84	-0.049190244	-0.072140678	-0.568807906	0.854755696	-0.304896053	-0.089487167	0.223303539	-0.337993393	0.169405165	-0.621384814	0.020880478	-0.624741148	NA	0.235546318	0.294980375	-0.251414433	0.205305393	0.535088876	1.451356183	-0.117770536	-0.21035073	0.120002792	0.12009148	-0.354962126	0.192354392	0.143407463	0.037295785	0.290278698	0.049456609	-0.035005609	-0.361831071	-1.33408149	0.164666622	-0.055935632	-0.268140917	1.073328668	0.251458862	1.133078126	0.245061587	0.144360051	1.20375278	0.743031983	-0.054773026	0.065787741	0	-0.489716661	-0.372949516	-0.222893583	0.042388766
85	0.482796451	-0.448946887	-0.34969933	0.158199615	0.155207264	-0.563347743	0.683046338	0.15435066	NA	0.164751436	-0.420680274	-0.171975265	NA	0.1208007	0.397298519	-0.763569645	-0.196745077	-0.191523768	-0.393042588	0.106969221	0.332966097	0.080381112	0.352204968	0.176554962	0.502470819	-0.135018212	0.294682512	-0.193584749	0.295724644	0.399916409	-0.216664585	0.279599496	0.685165411	0.424548523	0.190537712	-0.099820335	-0.165700456	-1.633730605	0.247328718	0.054677561	NA	-0.424495034	0.237598572	-0.659325632	-0.2338254	-0.386250889	0.155121637	0.475177721	NA
86	0.053161548	0.696242385	0.947130267	-0.061024702	-0.327393573	-0.132845913	0.254176994	0.148506208	-0.021836695	0.55583723	0.510725619	0.642853387	-0.100925919	-0.289817685	-0.160755779	0.104720311	0.257892744	0.476668867	-0.107919342	-0.047825629	0.136277618	-0.114625526	0.016168581	0.097126711	0.06024808	0.46140426	0.116448813	-0.212698293	-0.201015199	0.178982656	0.15435066	NA	0.640484528	0.229841073	0.312179544	0.71275371	-0.192008322	-0.097502581	-0.027268427	0.132605965	1.907080217	0.56144269	0.21929616	0.287131921	0.011533236	0.002696362	0.167207919	-0.098826354	NA
87	-0.084469157	-0.698964066	-0.377169239	-0.303811454	NA	-0.010555514	0.257970008	-0.015621381	-0.431552443	-0.506667614	-0.789217649	2.689784392	NA	-0.29961971	-0.275226631	-0.376731889	-0.186209104	0.085259844	-0.328087487	-0.416424948	0.36824772	-0.353964335	0.05088321	-0.427404016	0.134618302	-0.466011608	-0.613781625	-0.190313407	0.438254931	-0.011768984	-0.611198598	NA	0.056569351	0.229205143	-0.153151179	0.657260902	-0.006722546	0.64479692	0.286831711	0.335614726	0.553712685	0.147816375	0.105080476	-0.08872193	-0.670603216	NA	-0.252572362	-0.424953785	NA
88	0.201879056	-0.392894451	-0.710496819	0.329807218	NA	-0.354819523	-0.078718585	-0.17924629	0.216078654	-0.322549608	NA	0.126720753	-0.201137471	-0.389345726	-0.109033921	-0.705827234	-0.2714151	-0.590410103	-0.01440323	-0.365859854	-0.342349474	-0.127038233	0.01400152	-0.26175445	0.140978593	-0.005515181	0.101563315	-0.221769496	-0.647409289	0.016955441	-0.467925789	NA	-0.073861849	NA	0.39041915	-0.464578373	0.436252928	0.365684238	0.009257021	-0.063792133	-0.160051388	0.045833416	-0.152918106	0.444108732	-0.114625526	-0.456968951	0.211718534	-0.321997503	NA
89	0.639904619	1.116779593	-0.720723948	-0.022552404	NA	-0.212079979	-0.532900831	-0.681021001	-0.235469201	-0.444725822	0.625991905	0.023228126	0.043251042	1.111956195	-0.342490309	-0.083055575	NA	-0.233572747	-0.295176754	-0.906587956	-0.120361357	-0.025317808	-0.078069655	0.018821754	0.546617388	0.763605644	-0.272596435	0.019018006	0.308146246	0.009257021	-0.163696093	-0.550606494	-0.052662653	0.003693172	0.091119593	0.845524861	0.097398906	-0.946234608	0.241297762	0.346422567	0.465367901	0.556181325	0.10858531	0.36686287	-0.337572842	-0.125790006	0.469128246	NA	NA
90	0.080196542	0.884015443	-0.228407381	-0.268925744	-0.39705061	-0.321583624	-0.564050607	-0.370628993	-0.121038328	0.306160294	0.159820291	-0.1537341	0.250291683	0.128129328	0.29020389	-0.735637232	-0.552863635	0.040085724	0.049171044	0.161268148	0.027031339	-0.120135801	-0.034591445	0.101201881	0.046883586	0.504948387	0	0.186977368	-0.111937653	-0.138228119	0.2059567	-0.335752496	0.143060843	-0.377460912	0.037488444	1.153037341	-0.109145447	-0.023575737	0.171766043	0.353750672	NA	-0.319516796	0.144360051	0.320415442	-0.119797563	-0.006319929	0.054677561	-0.474172306	-0.232436598
91	-0.647600366	0.072878645	-0.105360516	-0.41143288	NA	-0.547489608	-0.733760863	NA	-0.167708844	0.175464769	-0.215051381	-1.406905315	NA	-0.131020262	-0.100594115	-0.301105093	NA	0.284050486	0.20343052	-0.410226425	-0.408269035	-0.30652516	-0.342490309	-0.49511633	-0.100372974	-0.088940509	-0.754809841	-0.035316345	-0.043951888	-0.126584152	-0.245261357	-0.533923675	-0.659519	0.146003294	-0.260066905	0.069992372	-0.190313407	1.919434161	-0.202728367	-0.108810906	NA	-0.767655233	-0.2165404	-0.448007331	-0.215671536	-0.574653287	-0.212945726	-0.807212137	-0.395712817
92	0.177895108	0.437415869	-0.111378588	NA	NA	-0.520202786	-0.298675614	-0.604403971	-0.807660567	0.064663513	-0.32628431	NA	NA	-1.065951506	-0.092553982	-0.471604911	NA	-1.04072081	-0.933691247	-0.441455046	-0.222393832	-0.566867015	-0.119572135	-0.475136781	-0.192614346	0.11680478	-0.147804195	-0.102032726	-0.939559359	-0.040613683	-0.324346057	0.001998003	-0.081426999	-0.067636649	-0.152102778	0.068872864	-0.142255048	-0.821662603	-0.225646682	0.015184135	-0.100483539	-0.207393241	0.065319466	-0.054984308	-0.29961971	-1.140059479	-0.275094957	-1.08915713	NA
93	-0.022654691	0.995212812	0.381172416	-0.719901918	NA	-0.802515718	-0.128174339	0.481685134	0.31429966	-0.242708707	-0.230671818	0.076034686	0.006975614	-1.242713633	0.190785635	-0.276148837	-0.502526821	0.138282588	1.804379501	-0.056887862	0.350586447	-0.388460509	0.042963699	-0.132275039	-0.032419891	0.738311733	-0.71621112	-0.184043038	0.008563231	-0.003807238	-0.374838915	0.260747574	0.54950773	-0.026652031	0.357464632	-0.245261357	0.030141157	1.404846207	0.11395349	0.324688798	0.324688798	0.475115541	-0.017756722	NA	0.217929984	-0.01959065	NA	NA	NA
94	0.204979581	0.604916879	0.177978807	NA	NA	0.030820142	-0.121038328	-0.891354247	0.000299955	-0.224018934	0.355293991	-1.806061254	-0.731472295	0.268346336	0.009752291	0.189048878	NA	-0.105027238	-0.424800844	-0.45413028	0.176890167	-0.184884839	-0.377023434	0.058080211	0.194497133	-0.273253336	-0.208994128	0.183570776	0.139848895	0.036717583	-0.139836945	1.185859749	-0.027268427	-0.290352301	-0.274700038	-0.008838949	0.208151733	0.324833338	-0.115972176	0.011928571	NA	-0.544727175	0.072413681	-0.655273528	-0.12499649	NA	NA	NA	NA
95	-0.260196616	-0.005716307	0.088468648	NA	NA	-0.329337748	-0.426637673	0.065506802	-0.260585847	0.015676479	-0.571106555	-1.0820502	0	NA	-0.088175691	0.490969795	NA	-0.244622583	0.36824772	-0.482562158	-0.493804639	-0.583396317	-0.236355445	NA	0.429832465	0.046310903	0.033821548	-0.361687486	-0.422204432	0.108405874	-0.280772664	-0.2390189	-0.248333162	-0.149776925	0.18140447	-0.081318521	-0.053400777	0.838502148	-0.16629074	-0.084142768	1.09854562	0.104450101	-0.284487182	NA	-0.187052731	NA	-0.000700245	-1.351699716	NA
96	0.027323296	0.652949991	0.635094249	-0.719285838	0.236967558	-0.454917992	0.047646653	NA	0.079734968	0.567243764	-0.698360748	-0.603123678	NA	-0.277599737	0.054677561	-1.368454443	NA	0.191611604	0.248889268	-0.097061713	0.221221706	-0.365139237	-0.033660201	-0.365715689	0.279070096	-0.477552047	-0.011566636	0.050788167	-0.144447904	-0.049085208	-0.33785319	-0.177453425	0.255494568	-0.18572735	0.153407547	0.692296819	-0.212203611	0.468940564	-0.040926167	0.036524775	-0.016434306	-0.030253043	0.269645385	0.018429135	-0.028399475	-0.657201054	NA	-0.379358861	NA
97	NA	-0.026343975	-0.463306108	0.360398005	-0.606052474	-0.137080541	-0.167590592	NA	0.330238562	0.804420183	-0.083599024	NA	-0.137080541	-0.835171681	0.032563991	0.196635291	0.084616846	0.957355897	0.862721165	-0.073108472	-0.034591445	-0.258770729	-0.060280931	-0.319654452	-0.177095238	-0.242581245	-0.012781334	-0.018877056	0.150658876	-0.107919342	-0.437265421	NA	0.273456365	-0.295848662	0.365129107	0.687531442	0.081395638	2.302535092	-0.011566636	-0.059962341	NA	-0.272333796	0.094764576	0.233727345	0.037681067	NA	-0.346724613	-1.07089985	NA
98	-0.228281729	0.161012796	0.105890375	-0.064538521	NA	-0.229916436	0.25332352	-0.712533894	-0.647409289	0	-0.30788478	2.082910518	0.068406033	0.283222142	-0.012781334	-1.380709983	0.397836081	0.050598053	0.096672887	0.101201881	-0.022552404	0.020194707	0.018821754	-0.612120342	-0.012275031	0.047360571	-0.291957867	-0.246284244	-0.342349474	0.136190354	-0.548008415	0.2469382	-0.450044152	-0.215671536	-0.470163642	0.355504259	-0.278920567	-0.039364724	0.232539273	0.162458928	-0.107028573	0.345361184	1.00E-04	-0.107139876	0.03246719	-0.915790857	0.201552125	0.207420591	NA
99	0.155635292	0.341957167	0.346634709	-0.595476153	NA	-0.406465608	-0.206901176	0.451457712	-0.160638346	0.278389026	0.06428849	NA	NA	-0.244239515	0.173280812	0.912644091	-0.681021001	0.085535288	0.172102857	0.313934444	0.188220789	0.184901559	0.016758784	-0.009848336	-0.094200795	0.45062966	0.233727345	0.05902334	-0.077205071	0.065600457	0.346281115	-0.458549479	-0.122167634	0.219456763	0.064663513	1.598457852	0.050312814	1.883152898	0.168222632	0.044303926	-1.293897512	-0.022450129	0.027031339	0.283297474	0.171176346	NA	-0.48824907	-0.040821995	NA
100	-0.509992637	0.258510695	0.240590465	-0.385368406	0.05902334	0.187972228	-0.343335737	-0.17304472	0.088285565	1.007519868	0.025277807	-0.9331826	-0.14664558	0.279145741	-0.460924965	-1.247228313	NA	-0.038117322	0.166869452	-0.13868752	-0.150241663	0.108405874	-0.108699417	-0.137080541	-0.080884729	0.105080476	-1.932401799	0.041141943	-0.322549608	0.308072762	0.345431978	-0.292091781	-0.479488468	-0.44488184	-0.515335779	0.097398906	0.236888653	1.447365942	-0.139836945	0.127865371	-0.905598102	0.017741681	0	-0.238384101	-0.652965391	-0.061875404	0.335257213	NA	0.00796817
101	-0.869168625	0.492131981	0.770247101	-0.279052746	-0.243728985	-0.472887784	-0.067743652	-1.20330636	-0.013693327	0.171597593	0.352204968	-1.084117843	NA	NA	0.127865371	-0.031387473	NA	0.347977228	0.274520842	NA	-0.029428811	-0.062833309	-0.011263192	-0.243218716	-0.229287386	-0.020508877	-0.798063351	0.259514053	-0.037390389	0.201715604	-0.271808723	-0.757579041	0.019998687	-0.837248525	0.129887261	0.760057886	0.073250462	1.481490898	0.176387317	-0.0965109	NA	0.01597177	0.309541407	-0.193584749	0.124957239	NA	-0.522055106	NA	NA
102	-0.250900228	NA	-0.989668202	0.286005668	0.40772921	-0.06166266	0.932793804	0.726727014	NA	1.223510691	0.992436626	0.590948328	NA	-0.229035877	0.339254078	0.290876963	-0.031903549	-0.113504701	-0.085448962	-0.057205474	0.339467746	-0.414606766	0.061189168	0.477475644	0.382878609	-0.35638927	0.171260609	0	-0.599474705	-0.382285835	-0.464896692	0.455080329	0.565370626	0.222343231	0.149281703	-0.494788246	0.097126711	-0.131818575	0.015873349	-0.206655234	1.2997556	0.863859949	0.276039561	0.231032353	-0.220521991	2.015902521	-0.373094728	0.53608393	0.802405091
103	-0.30734071	0.076405331	0.64138009	0.381513887	NA	-0.09376138	-0.238637972	0.47262519	-0.014301785	-0.085122253	-0.08349031	-0.271283927	NA	-0.806539868	0.091758425	0.38662202	0.046024438	0.566676517	0.231270439	0.546096238	0.249512806	0.420156657	0.185150884	-0.022859294	0.095764622	-0.308020843	-0.002202424	-0.038117322	0.076497971	0.206851555	-0.321721565	-0.636766847	-0.038221213	-0.152335661	0.482179205	0.313715249	0.102285794	0.721151377	-0.144563451	-0.106138596	-0.346300375	0.75381886	0.012521281	0.701611259	-0.208624465	-0.480619782	0.01133551	0.050122609	NA
104	-0.092553982	-0.020713042	1.22524494	-0.029840842	0.635253202	-0.36658099	0.286756644	-0.543693227	-0.511659305	0.070272053	0.176554962	-1.10262031	NA	0.331962081	0.206363551	-0.487271871	-0.037701867	0.177141497	0.328224028	0.226657371	0.149367832	0.024985253	0.107867371	-0.0062193	0.429181635	-0.635255702	0.176722578	-0.116309122	0.164327293	0.053066721	-0.71070034	-0.181162229	-0.473369287	-0.266312047	0.003992021	1.211494446	-0.024907636	-0.158526908	-0.121602822	-0.046043939	-0.385515433	-0.02706292	0.094491663	-0.090252989	-0.332679438	-1.054117049	-0.845133538	-0.432630776	NA
105	0.342738278	-0.923063616	-0.605685905	0.445582855	-0.632993258	0.039316862	0.119559235	-0.955291469	NA	-0.055935632	-0.226273444	-1.3108159	-0.028296599	0.01597177	-0.171856507	-0.800287056	0.242083061	0.295427003	0.419762413	-0.008738066	-0.095520202	-0.094860281	-0.210474148	-0.349983099	0	-0.338694704	0.052212871	-0.071818288	-0.200159715	-0.164167346	-0.163342798	0.466873736	-0.247692424	-0.17840922	-0.453343188	0.310714772	0.024107075	1.618833634	-0.055407007	0.014790085	NA	-0.540426094	-0.423578164	0.234281296	-0.150590359	NA	-0.871317366	-0.214431611	NA
106	-0.163225061	0.137411356	0.857389624	-0.4167283	NA	-0.334354481	-0.003205131	0.642327458	-0.123750807	0.081487817	-0.234710188	-0.846764669	-0.458865885	0.362418419	-0.109926479	0.033434776	-0.094640404	0.329087897	0.449162963	-0.277071893	0.011038847	-0.22589734	-0.475941222	-0.317866404	0.036621183	-0.774574179	0.094582642	-0.170313938	0.109930059	-0.190918404	-0.433401727	-0.181881654	0.044782143	-0.47981157	-0.082186671	1.35115929	0.054677561	1.535188392	0.019312311	-0.207393241	-0.88116493	-0.142831649	0.158199615	0.259745454	-0.176140698	-0.603855073	0.286306126	-0.591854929	NA
107	0.767558678	-1.07031642	-0.494788246	0.430742915	NA	-0.954511945	0.943438864	0.358932394	-0.289283354	-0.25812327	-0.391562203	1.096677084	NA	1.711145765	-0.339396508	-0.590049223	0.454636152	0.31444571	0.400050475	0.134705703	0.509704996	-0.345311185	0.398910339	-0.13547614	-0.129539371	-0.454287773	-0.124430078	0.01242252	0.054298773	-0.196745077	-0.048140375	0.429181635	-0.474332987	0.611720182	-0.023985363	0.398574757	-0.065819341	0.277631737	0.44519851	0.067378235	-0.440056553	-0.196014884	0.495610458	-0.476263179	0.058080211	NA	0.350022868	1.060633471	NA
108	-0.119121431	-0.131818575	0.175380859	-0.800287056	1.379521477	-0.222268934	-0.721546655	-0.650854268	NA	NA	-0.025112701	-1.671845373	NA	0.250836536	-0.229538958	-0.534947566	-0.365283318	-0.401821753	-0.230923739	-0.545762194	-0.157941188	-0.230294055	-0.054561788	0.186396576	NA	0.000299955	-1.021095846	-0.21035073	-0.215423428	0.146694379	-0.012477522	NA	-0.511826124	-0.156887756	-0.02850236	-0.693947501	-0.2026059	-1.383897237	0.155036002	0.055434707	-0.682602967	-0.24910259	-0.209857207	-1.279414999	-0.527124397	0.216239775	-0.063898726	-1.189741222	0.476296289
109	-0.202238591	0.226338442	0	-0.936493439	-0.602758181	-0.043220702	-0.012578782	0.713439884	-0.096731189	NA	0.156234222	2.106132157	0.443210374	-0.108365025	-0.05551271	1.361335463	NA	-0.026857454	0.001299156	-0.458549479	0.310494871	0	-0.25502129	0.350445582	-0.128174339	0.215998083	-0.450985623	0.03575317	-0.113280686	0.002097798	0.634246073	0.100388174	-0.36658099	-0.303675962	0.174961202	0.155292884	0.318453731	1.509573377	-0.219898821	-0.078826781	NA	-0.008233805	0.007273484	0.051263294	-0.361974677	0.308587033	-0.353252237	0.479273035	0.483598302
110	NA	-0.529668712	1.101607798	0.125839385	NA	0.058268908	-0.296924654	NA	0.339681368	-0.726083681	-0.895508193	3.775130542	-0.037805715	0.363461861	0.190372395	1.722838024	-0.486295626	0.434052565	0.949261184	0.195731244	-0.830113036	-0.196014884	-0.245005798	-0.501370465	0.153579088	0.238544348	-0.251671635	-0.34658318	0.085168012	-0.363987329	-0.531879033	-0.649704623	-0.709683149	-0.789217649	-0.107362518	-0.785043195	0.483721606	2.317601776	-0.132617525	-0.070207895	-0.088175691	-0.228407381	-0.256571077	-0.289149816	-0.414001439	NA	1.547158172	-1.443923474	NA
111	0.126544541	-0.556346139	-0.748237147	-0.009141658	NA	0.423305026	-0.966531948	NA	-0.122619714	-0.435872771	-0.72815279	-1.10262031	-0.33785319	0.106160196	-0.09123848	0.543370255	0.396155239	0.721540255	0.574926549	-0.493313199	-0.339396508	-0.068492996	-0.252057561	-0.30870144	0.003095205	0.069526063	-0.378920553	-0.027473977	0.037392119	0.405065028	-0.061237309	-0.375129908	-0.144447904	-0.188742125	-0.269973139	-0.16511052	-0.230168166	2.145018586	0.412043423	0.064663513	-1.235807528	0.110377907	-0.396753168	-0.798729943	-0.026343975	-0.371933625	0	NA	NA
112	-0.283026261	0.0605305	-1.022206957	0.607698219	-0.267748735	-0.513830133	0.047646653	-0.241434821	-0.175306222	0.209288005	0.061565356	-0.180922536	NA	0.13208034	0.024595047	-0.981362729	0.275736001	0.156747306	0.080104244	-0.690949597	-0.194677579	0.194332469	-0.193948893	0.105800419	0.107418397	0	0.044399587	-0.173758326	0.342099232	0.027712439	-0.148500008	-0.29410264	-0.06038715	-0.465692934	-0.129653208	0.212689093	-0.218653646	-0.48240015	0.107777592	0.097126711	NA	-0.369760183	0.091119593	0.057985849	-0.324207754	-0.852611955	-0.149544637	-1.119631656	NA
113	-0.044265416	-0.68458395	-0.841879234	0.305644773	NA	-0.238257189	-0.443790222	0.45285747	-0.120361357	NA	-0.914043259	-0.434790937	-0.248589573	-0.436800988	0.102376067	-0.429245637	-0.117320643	0.037392119	0.929601746	-0.846065287	0.02508278	0.13155444	-0.262664309	-0.728359936	-0.030046921	-0.005515181	0	-0.317179543	-0.27746775	-0.150125459	-0.080884729	-0.026036015	-0.276676193	0.168982992	-0.443011224	-0.431706419	-0.249487527	1.351288752	-0.170551101	-0.004912044	NA	0.099302201	-0.241816817	NA	-0.120474153	-1.10835964	-0.618225254	0.029364609	NA
114	-0.222144051	-0.357532454	-0.191766016	0.757295	NA	-0.251928903	0.711085326	-0.047510983	-0.031077956	NA	-1.184170177	0.020782539	-0.174948802	-0.216788786	-0.100925919	-0.787238104	0.257815473	0.746308729	0.620845269	-0.016027761	-0.673540651	-0.059007181	0.111094048	-0.277995803	-0.182961762	-0.685972977	-0.488086137	-0.162518929	-0.297059234	-0.05921936	-0.464896692	-0.208870892	0.345927395	0.305202686	-0.318416232	0.279448268	-0.551821244	2.196902303	0.221942831	-0.033246594	0.44519851	0.465807337	-0.087848091	0.004987542	0.165005835	-0.017654935	NA	-0.199304962	0.050978245
115	-0.004510155	0.062693069	1.232618569	NA	-0.451927983	-0.626423549	0.322373312	0.449354394	-0.559840813	NA	-0.835402228	-1.060449828	-0.257734996	NA	-0.469203949	-1.202973304	NA	-0.195285223	-0.039260714	-0.168418652	0.331459695	-0.444413858	0.0009995	-0.495444522	NA	-0.474654427	-0.311018938	0.095491981	-0.344040806	0.089292107	-0.161813296	-1.128247094	0.259976801	0.082501222	0.79195125	1.587008237	-0.045415864	0.922749827	-0.076557123	0.060812839	NA	-0.127719742	0.082685367	-0.156069186	-0.241944181	-0.774357236	-1.037893554	-0.289550484	-0.726910811
116	0.395078015	-0.727324632	-1.0820502	0.398037592	-0.410829471	-0.456968951	-0.011465478	-0.408569923	-0.449416996	-0.158644093	-0.196258223	2.955613157	-0.180802711	0.757154311	-0.268271679	-1.225536982	0.478963371	-1.2772606	-1.400393285	0.31816278	0.368939427	-0.265268478	0.076220026	0.06165938	-0.170551101	-0.25902983	-0.113056722	-0.398241263	-1.241328591	0.086544601	-0.443634374	-0.233067633	0.247641023	0.036910354	0.405398439	-0.113392687	-0.116309122	-0.51232675	-0.459340681	-0.111490376	-0.807212137	-0.246668096	0.011236632	0.456094849	-0.217410019	-0.822345119	1.410547853	0.930351416	NA
117	-0.050661915	-0.186691089	0.149626174	-0.78329073	NA	-0.176259965	-1.14790758	NA	0.339752565	0.184070027	-0.352398387	NA	NA	0.096037188	0.497557997	0.036235493	NA	-0.035938107	0.512823626	-0.381992752	-0.189467025	0.039893564	-0.053295297	-0.497744884	-0.105249411	-0.28143496	0.058646195	0.029558802	0.262056525	-0.040613683	-0.506999619	-0.241944181	-0.291823972	-1.078515587	0.067938983	0.209044627	0.080657903	4.276160436	-0.119572135	-0.12397718	NA	-0.203953857	-0.097282123	0.144273489	-0.128401715	NA	NA	-0.341223506	-0.400179104
118	-0.125676608	-0.09014355	-0.05234648	0.18548322	NA	0.415877378	-0.837941765	-0.768733168	-0.057523186	NA	-0.018775155	-0.343476711	0.761132878	-0.184403723	-0.291957867	0.696989788	-0.002603386	0.63472326	0.738120546	-0.950364712	-0.238764932	-0.214555534	-0.336592244	-0.543176654	-0.079367935	-0.039989008	-0.633558389	-0.006420568	0.379805361	-0.111602177	0.172102857	-0.246028424	-0.017960325	-0.075909594	-0.463942038	-0.060068526	0.110825555	1.612612867	0.122394608	0.020096702	NA	0.253168264	-0.105582763	0.092579181	0.136103083	-1.081165375	-1.001304106	NA	NA
119	-0.717849793	0.08204071	-0.993171776	-0.846065287	NA	0.181738053	-0.534947566	0.338398951	-0.07063708	NA	-0.183201944	0.01133551	0.238544348	0.010247316	0.0660686	0.225460864	-0.470483744	0.478157794	-0.234457311	-0.707854809	-0.045206593	-0.183682482	0.051453282	0.075200233	0.01597177	-0.602392817	-0.237496058	-0.168300315	0.208638865	-0.1030299	-0.635633274	-0.211956362	0.28735702	-0.201871416	-0.276808076	1.507139371	0.192271888	1.094738127	0.026641931	-0.27812786	NA	0.001399021	0.021761492	NA	0.278010453	NA	-1.386694441	NA	NA
120	-0.365859854	0.482796451	0.593713511	0.132956227	NA	-0.248204982	0.088834714	0.227454247	-0.462988294	-0.378920553	-0.26683424	0.204816635	0.053919842	-0.985372893	0.219376465	0.086269435	0.14384057	-0.018265809	0.74787208	0.001698557	0.274368843	0.019998687	0.05287704	0.094582642	0.004888034	0.146953413	-0.149428513	0.048218572	-0.022143365	-0.003405793	-0.531538665	-0.790760009	0.104450101	-0.005515181	0.176890167	-0.162401289	-0.055724149	1.037906414	-0.133417113	0.108944087	NA	-0.76593295	0.226418184	-0.238637972	-0.506335718	0.015085637	-0.349273828	-0.984034384	NA
121	-0.555997342	-0.551474022	0.264592549	-0.383605774	NA	0.292371062	-0.378044513	-0.06592615	NA	0.067845547	0.155036002	NA	0.229046097	0.196060083	-0.002803927	-0.002002003	-0.313478627	-0.216788786	0.57526414	0.21929616	-0.370339306	-0.289951312	-0.302998777	-0.378190466	-0.393635356	0.224981861	-0.327116142	-0.192008322	-0.73168013	-0.544554777	-0.066353501	-0.569161201	-0.523910863	0.045164552	-0.198694871	-0.645500527	0.036235493	-0.334214787	0.171092075	0.083053555	NA	-0.144794585	-0.410075721	-0.410377152	-0.321032052	-1.235463471	-0.264095763	-0.347856795	NA
122	0.045164552	0.727500297	1.235180731	0.945072533	-0.272071225	-0.497744884	-0.112608944	0.750236148	-0.000700245	-1.255266099	0.156148682	-1.32275634	NA	-0.006521217	0.057136191	-0.534435489	1.885796111	0.780241887	1.401847777	-0.156536858	-0.241434821	0.16271391	-0.089705913	-0.139836945	-0.021734492	0.237677421	0.09276148	-0.171381617	0.399312889	0.239803992	-0.263705163	-0.491022996	-0.081101601	0.325050109	0.104360015	0.077608979	-0.097723089	1.945066937	0.396760667	0.044973366	-0.027988037	0.372459706	-0.061556306	0.12018016	-0.064111945	-0.653926467	-0.584831037	-0.757365753	NA
123	0.102737077	0.132167964	-0.638469619	-0.037494204	-0.443322751	-0.423120043	0.526856441	-0.607703699	0.104720311	NA	-0.754809841	-0.331703625	-0.064965279	-1.082935809	0.163138737	-0.485157877	0.504888031	0.210098838	0.014494446	-0.154200681	-0.388313049	-0.47032368	-0.13834295	-0.021530119	-0.010757657	0.370873663	-0.149428513	-0.103362513	0.357044876	0.201797333	-0.322549608	-0.042385716	0.296691367	0.161948767	-0.125109811	0.064100925	-0.033039854	0.56559786	-0.12806067	0.055245474	NA	0.014494446	0.150744887	-0.446130865	-0.099930839	-0.021427947	NA	-0.972596568	-0.421137278
124	0.072227634	0.550546212	-0.685774426	NA	NA	0.38580647	-0.538710827	-0.413698913	0.55938719	1.347709446	-0.678455632	-0.26487742	-0.03573081	0.445582855	0.110736042	-1.349769586	NA	-0.488575015	0.710200935	-0.385515433	-0.172450437	-0.183201944	-0.249230886	-0.273121921	-0.215795614	0.519150873	-0.109256986	-0.082838278	0.284577257	0.496888958	-0.327948666	NA	-0.048560191	NA	0.27277146	0.383492127	0.100749903	-0.205303633	-0.189104509	0.151776435	NA	0.163138737	-0.339817827	-0.403018104	0.09803374	-1.050679635	0.163648292	-0.544382407	-0.452713961
125	0.150142658	0.197128064	-0.780667778	0.69937773	NA	-0.294773826	-0.080017708	NA	0.178313535	0.030723173	0.358443379	0.37740851	NA	-0.193220738	0.011829752	-0.042177079	0.509524778	0.84035956	0.996542648	0.551065049	-0.510492346	-0.704612659	-0.025933382	-0.160520927	-0.581248088	0.355504259	-0.14792013	-0.018877056	-0.085666827	0.09567375	-0.158644093	-0.6680644	-0.564402225	-0.020508877	-0.027165668	-1.654958428	-0.311974765	3.752860789	-0.372949516	-0.165818485	NA	0.044590883	-0.22777928	0.070738015	-0.34658318	0.015184135	-0.175306222	-0.691548459	0.405998299
126	-0.583934096	-0.41521246	0.686021856	0.542673067	NA	-0.341223506	0.390960422	-0.58590843	NA	-0.874908894	-0.720107362	NA	-0.171619034	0.292594984	0.096037188	-1.10292156	0.372735283	0.45062966	0.673148534	-0.378774493	0.183487543	-0.157355811	-0.549566452	-0.590590592	-0.070959089	0.116626812	0.295947817	-0.215051381	0.183820433	-0.035938107	-0.406165353	-0.270497248	-0.236228791	-0.468245176	-0.13159042	-0.645691239	0.063162575	1.639443217	0.257429029	-0.112273242	NA	-0.15466748	-0.154900961	-0.23041996	-0.565809932	-1.042137442	-0.686171567	-0.548008415	NA
127	0.354522629	0.109571636	-0.127151786	-0.030871664	-0.050451543	-0.206163531	0.280959527	0.022934971	NA	-0.183802653	0.069152859	0.313276717	-0.837017551	-0.815766894	0.070738015	0.152034156	NA	0.581209527	0.573969423	-0.547662514	-0.062088192	-0.230042293	-0.042594398	-0.272727781	0.044016885	0.302398256	-0.501040323	-0.113840816	0.352978119	0.23039718	-0.2007707	0.090297638	0.159990736	0.044208255	-0.37164356	0.394875907	-0.012680053	-0.332121714	0.169405165	0.07612736	NA	-0.372949516	-0.070207895	NA	-0.194920592	-0.17411532	NA	NA	NA
128	0.002397125	-0.133645685	-0.649321701	-0.144910172	-0.020610954	0.337828459	-0.755661086	-0.262924421	0.071017487	-0.03035612	-0.441299561	3.28012143	-0.360396145	NA	-0.082621029	-0.270759405	-0.086647807	-0.244878043	-0.300429645	-0.445662298	-0.603489309	-0.340801595	-0.029531803	-0.495937011	-0.145372653	-0.222768622	-0.048665172	-0.452713961	-0.436027414	-0.272990524	-0.207270202	-0.54283242	0.289605222	-0.121828708	0.280279743	-1.232715273	-0.097171912	-0.058370913	-0.136851183	0.072320662	1.711994501	0.323604082	-0.116646182	0.114577905	-0.150241663	-0.251414433	0.719545654	-0.101036544	NA
129	-0.032729825	0.41534943	-0.528650209	-0.083925235	-0.75438449	-0.032626503	-0.146761381	0.009851316	-0.113840816	-0.197475805	0.096128027	-0.902141309	1.555298466	0.64353668	0.296022197	0.5465016	0.072320662	0.181237636	0.045068963	-0.043116291	0.344652969	0.048980622	0.120712075	-0.01399751	0.190703001	0.139761942	-0.073754189	0.260516404	-0.184644252	0.102646837	-0.013896105	-0.167117723	0.500775288	0.041141943	0.480696259	0.952545513	0.053919842	-0.350976923	0.199260611	0.142540687	NA	0.376379527	0.221942831	0.718132433	0.017053755	-0.124543335	-0.017146159	-0.049925809	NA
130	0.10282731	-0.372223774	-0.75587401	0.078256498	-0.153850725	0.355574338	-0.022859294	-0.124430078	-0.030253043	NA	-0.349132035	-1.671845373	NA	-0.666894809	-0.111825815	-1.699909816	-0.082078111	-0.93828075	-0.599292605	0.390013004	0.279523885	0.008563231	-0.299889616	-0.348565061	-0.374548005	-0.141563564	0.017446914	-0.186329578	-0.146298258	-0.125223145	-0.139147131	-0.339677368	-0.12363764	0.514319513	-0.210227326	-0.169010543	-0.082512422	-0.308156926	-0.050241216	-0.148500008	-0.081535488	0.039220713	0.121420855	-0.147804195	-0.096400774	-0.526955006	0.017839918	NA	NA
131	-0.142139767	0.46033201	0.39877612	-0.59602047	0.178229864	-0.383312303	0.00608147	-0.11272087	-0.141333176	-0.45413028	0.00079968	0.284953353	NA	0.385738478	-0.16735413	-1.156453288	NA	0.006876304	-0.139836945	-0.327948666	0.117338492	-0.474654427	-0.06400533	-0.040821995	0.022739487	-0.730849048	-0.223518622	-0.347715203	0.16509062	0.054677561	-0.378044513	-0.215671536	0.583053258	0.471440097	0.132781111	0.605244497	-0.282230294	-0.573942933	-0.452399495	0.063350316	1.419729137	0.480943569	0.241926051	0.134181181	-0.693547261	-0.651237777	-0.209980565	0.427617913	NA
132	0.44794972	0.4408966	0.294235551	NA	NA	0.000899595	0.025667747	-0.157824085	NA	0.172607865	0.079365555	-1.48456893	NA	1.412181382	0.459132249	0.302546054	NA	-0.615260642	-0.2165404	0.234676787	0.443146175	0.228648372	-0.01349059	0.038451186	NA	0.159394052	0.022739487	-0.321997503	0.103097958	0.254564696	-0.050136069	-0.537683078	-0.17542539	0.425594479	-0.055407007	1.047003155	-0.63544447	-1.049250859	0.435347483	0.085076172	-1.134446742	-0.134903762	0.210422987	-0.921052049	-0.000300045	0.023325825	-1.610438413	-0.095520202	-0.160520927
133	-0.318278746	0.541975393	0.196963834	-0.602027587	-0.066567244	-0.393931872	0.226816797	0.633715597	0.04936143	-0.272727781	0.074550731	1.154204662	NA	-0.218031639	-0.038740828	-0.432939085	NA	0.244043615	-0.063365876	-0.392154094	0.004688989	-0.076989042	0	-0.228407381	0.14461969	0.481808675	0.14019663	-0.021836695	0.308954208	0.215514524	0.2112329	0.195073241	0.047646653	0.245218106	0.306233918	0.458689869	-0.121828708	0.997317571	0.423305026	0.337543092	0.509584854	0.206688913	0.082501222	0.228330078	0.027420596	0.457741253	-1.428367138	-0.389493339	0.197210169
134	0.354522629	-0.015113638	-1.430455257	0.132868673	-0.479004011	-0.268664067	-0.316081547	-0.228281729	-0.428477882	-0.803408575	0.091028298	-0.779140894	NA	NA	0.111362468	-0.611382879	-0.118558336	-0.711718566	0.786364262	-0.547489608	-0.119684843	-0.344887546	0.078071535	-0.178528759	0.310494871	0.259745454	-0.472085795	-0.024702613	-0.657201054	-0.12284583	-0.302322049	-1.00103196	0.225780073	0	0.090571698	0.487290841	-0.122167634	-1.127011763	-0.002904213	0.068499416	NA	-0.321032052	0.162288903	-0.318003832	0.17889904	-0.740029166	NA	-0.069135739	NA
135	0.314226628	0.738216144	0.027225986	1.064745219	NA	-0.504843552	0.360188763	0.029073247	0.106699619	-0.418550348	-0.550259693	0.279523885	NA	0.067845547	0.342312293	-0.071818288	0.901298914	0.792041838	0.146089706	0.318671889	0.406464608	0.436382211	0.036428357	-0.109591677	0.405198406	-0.209240646	0.329591476	-0.066353501	0.384309566	-0.108030744	-0.123750807	-0.377315065	0.744932854	0.431652538	-0.207393241	1.68730595	0.586007305	0.245061587	-0.002904213	-0.047301273	-0.464419251	0.456855064	0.343660624	0.354171814	0.250525228	0	0.0428679	-0.324484379	NA
136	0.256346192	-0.057629113	-1.162511015	0.754477436	-0.136163425	-0.694748462	0.56235489	0.033628181	0.27641888	-0.186329578	-0.304624793	-0.530858278	NA	-0.014301785	0.06363186	-0.867024491	2.094404043	0.020782539	1.794904518	-0.076557123	1.925692864	-0.196745077	0.070551656	-0.090909875	0.095946341	0.347412177	0.107598011	-0.132275039	-0.382872259	0.087369646	0.308660479	-0.296790091	0.035463664	0.011434378	-0.018469516	0.179066264	-0.069457265	-0.268925744	-0.380236054	-0.026857454	NA	0.111988502	0.121420855	0.144446604	-0.462988294	-0.342349474	NA	0.576557183	NA
137	-1.137561039	0.519745721	-0.581963652	-0.358390701	-0.219898821	-0.128401715	0.136539364	0.578689859	0.112792827	0.528508359	-0.330589573	3.246016171	NA	-0.055195635	0.071389996	1.36912277	-0.25489225	0.288706547	0.155977581	-0.357103607	0.233014671	0.081764302	0.146953413	-0.855901432	0.105440512	-0.317728994	-0.327393573	-0.095630231	0.00079968	-0.248461359	0.303284716	0.387029546	-0.714166548	0.324833338	-0.346866066	-0.942891414	0.001898197	2.20849417	-0.169484308	0.024399887	-0.005314095	0.225540676	0.13208034	-0.259807536	0.525083496	-1.054404034	NA	-0.243601393	NA
138	0.095491981	0.194661769	0.864239255	0.343305976	NA	0.03333806	0.267887445	0.477475644	0.049266241	-0.139836945	-0.0629398	3.037224443	-0.517514612	-0.250386288	0.141933496	-0.685179011	NA	0.208476514	0.065881369	-0.082403826	0.199833982	0.01350835	0.018625464	-0.124883182	0.12548662	0.034014879	-0.091896015	0.052497569	-0.142947009	0.022446189	-0.505838082	-0.161578196	-0.005113049	0.047074407	0.297657155	0.324399655	0.140457353	-0.005213567	-0.456337438	-0.095850326	0.105980324	0.071203759	0.191446465	0.329087897	0.283372801	-0.364707116	NA	0.121066528	NA
139	-0.440988664	0.404197639	0.353048376	-0.180203801	NA	-0.297059234	-0.05108279	0.36852446	0.083789526	-0.308156926	-0.294908118	-0.676093426	NA	-0.451770861	-0.117883041	0.519745721	-0.172806964	0.234993068	0.388725784	-0.687761708	0.116181754	-0.230923739	-0.027473977	-0.552863635	0.353188875	-0.339115728	-0.318828801	-0.097061713	-0.086647807	-0.209363928	-0.592397277	NA	-0.072893326	-0.312794773	-0.379651173	1.063917319	-0.323240168	0.756591353	-0.168892136	0.052687322	0.376997044	0.018919885	-0.148152041	-0.287415441	-0.735428573	-0.903127745	NA	-0.621198681	NA
140	-0.262144289	-0.440056553	-0.740867917	-0.152219213	NA	0.148592404	-0.133188594	0.114845392	-0.214679473	-0.36672528	-1.002665948	NA	NA	NA	0.007571265	-0.229916436	0.050978245	-0.424342164	-0.134331713	0.183071276	0.393594936	0.394808528	0.173785226	-0.602940913	0.329087897	-0.193706116	-0.03469497	0.15237768	-0.42098492	-0.147572364	-0.207516295	NA	0.449737144	-0.139491979	-0.017044435	-0.307068786	0.143927169	2.790852175	0.10625012	-0.095630231	NA	0.336472237	0.312618558	0.345290385	-0.096621039	-0.936748574	0.21446601	-0.577499757	NA
141	0.262595007	0.24678195	1.02729529	0.880705004	0.66371837	-0.240035419	-0.136736524	0.004888034	-0.449887326	0.071483102	-0.362836746	-0.224895084	0.207826847	-0.25502129	0.095764622	0.365684238	0.483659956	0.823561219	1.149051885	-0.857550237	0.140109708	0.11716062	0.278540415	0.039220713	0.038836024	-0.007024615	-0.02850236	0.335829173	0.284878145	0.208638865	-0.085013374	-0.308429146	-0.410678675	-0.247052096	-0.251285857	0.071017487	0.605899412	0.395751416	0.122748465	-0.015621381	1.443218025	1.044332082	0.08204071	-0.788777412	0.040853994	-0.688756832	0.078256498	-0.01399751	NA
142	0.192849279	-0.007729798	0.238544348	0.339681368	-0.034384427	0.077053629	0.189876281	0.560472564	-0.096070469	NA	0.536259425	-0.040509543	0.790228518	-0.944690206	0.110377907	0.114934538	0.054488185	0.136975455	0.220740667	1.055113103	0.432107039	0.151776435	0.170248976	-0.710903902	0.254952248	-0.064751877	0.135841223	-0.186691089	-0.051503843	-0.005816885	-0.002302649	-0.599292605	-0.039260714	0.71353787	0.260208095	0.71275371	-0.461876742	0.803301189	-0.014910613	-0.019284761	-0.590590592	-0.04019719	0.298918704	-0.217410019	0.13251838	NA	1.451309331	NA	NA
143	0.196553139	0.124780717	0.236809742	-0.140757438	-0.271939966	-0.316218731	0.60009944	0.30638115	0.004788517	0.101472969	-0.479650006	-1.169249368	-0.263835346	0.151518648	0.386350244	0.023032699	0.140544245	0.189462665	-0.026754737	0.030626194	0.149281703	0.036717583	0.237598572	0.207501855	0.407396575	0.204816635	0.077979041	-0.253216236	0.283899929	-0.101811266	-0.055089966	0.282242304	0.135841223	0.191363885	-0.262144289	0.634352134	-0.158058305	-0.041968485	0.161268148	0.115112807	0.622188092	0.304096614	0.159394052	-0.112608944	-0.282628198	-0.332121714	0.409921829	0.137672805	-0.565809932
144	0.38662202	0.368593633	1.188696717	-0.119121431	-0.285417971	-0.430013981	0.055623904	-0.335193055	-0.065498982	0.449673363	-0.574653287	-0.214307703	-0.032833157	-0.647600366	0.283598747	-0.484345991	-0.028296599	0.325266833	-0.189225333	0.069526063	-0.457758903	0.06241126	0.045737892	-0.552516051	0.30733763	-0.06720875	-0.080451124	0.083053555	0.46906569	0.116448813	-0.242708707	0.118227381	-0.14664558	0.026641931	NA	0.296394013	-0.045520515	0.063162575	-0.002202424	0.088102448	1.394981518	0.5645749	-0.027988037	0.197784717	0.687782818	-0.300969967	NA	-1.072067733	NA
145	-0.339256108	0.881492226	0.105890375	-0.011263192	NA	-0.408419468	-0.339256108	-0.215547475	-0.217285742	NA	0.144100344	-0.803855303	0.170333317	NA	-0.135590654	-0.590229647	-0.079909383	-0.162518929	0.172692008	-0.037909573	-0.116646182	-0.339958306	-0.16028613	NA	0.055150844	0.572390979	-0.739819589	-0.313615454	-0.165582441	0.072227634	-0.164049512	NA	-0.01136433	-0.350550877	0.041621675	0.338256358	0.406664389	0.970096866	-0.077421147	0.177978807	NA	-0.159230226	0.116181754	-0.162871933	-0.351118978	0.114756237	-0.862276144	-0.753534331	NA
146	-0.119121431	-0.134789326	0.10490041	1.369707558	-0.24028971	0.04142981	0.057325067	0.907572841	-0.000100005	-0.296252023	-0.56651453	-0.235089622	-0.110373057	0.235388278	0.223543471	-0.21716148	0.167377109	1.070966988	1.189884022	-0.107362518	-0.448007331	-0.089924708	-0.053506268	NA	-0.134102985	0.140978593	-0.157941188	-0.078069655	0.777534284	-0.010353412	-0.003004509	0.21333561	-0.112161367	0.593492577	0.426312941	0.462475363	0.045355702	1.899237741	0.100569055	-0.019488677	-0.534776845	0.068686158	-0.262664309	NA	-0.276544328	-0.457126891	-0.335332886	-0.351829559	NA
147	0.215756333	-0.466170983	-0.534947566	0.102105223	NA	0.910674993	-0.46140074	-0.479488468	NA	NA	-0.543004522	-2.037915795	NA	-0.442699795	0.170923512	-0.240035419	NA	0.243181445	0.683551287	-0.278920567	-0.293163736	-0.12284583	-0.149544637	-0.275094957	-0.196136546	0.080196542	-0.413245295	-0.119684843	-0.32628431	0.090206268	-0.184403723	NA	-0.456811035	-0.394376811	-0.734802856	NA	0.952506936	-0.800064463	NA	0.192189376	-0.005414633	0.425921117	-0.337012382	-0.899187824	-0.056887862	NA	-1.631172405	-0.529498889	NA
148	0.10858531	-0.208994128	-1.140372223	-0.203340924	NA	-0.361687486	-0.293566016	0.319616691	-0.023370986	-0.325868654	-0.938025224	0.964242449	NA	-0.119684843	-0.292359662	-2.005447862	NA	-0.024497632	1.024104236	-0.370484139	-0.330172124	-0.463465052	-0.04845522	-0.64207391	0.01202738	-0.284620098	-0.372659156	-0.287415441	0.070085608	-0.323654733	-0.362405619	-0.087411457	-0.133645685	-0.135819723	-0.609173747	-0.274436846	-0.19723217	-0.198085152	-0.005113049	-0.053611769	-0.093431945	-0.136048844	-0.189587893	0.228648372	-0.719901918	NA	-0.303540488	NA	NA
149	0.379600142	0.732608249	-0.155017722	0.421141587	0.120268832	-0.668259465	0.356554937	-0.352540645	NA	0.04018179	0.584280526	0.534913175	-0.117658043	-0.709073331	-0.110819835	-0.122167634	0.54522705	-0.00020002	-0.960503887	-0.8495671	0.100026314	-0.08349031	-0.050556724	-0.280375497	0.191776716	0.959848182	-0.259937212	-0.145951055	0.068125829	0.408460617	0.183154543	0.14366735	0.1919418	0.161778656	0.364434759	-0.320343015	-0.029119899	-0.032006796	0.079642628	0.704235478	0.138282588	0.440960944	0.072413681	-0.01065658	-0.11171399	0.231984356	1.435394001	-0.170551101	-0.425106748
150	0.137847067	-0.21183276	-1.134446742	0.302176519	0.805537926	-0.40167231	0.082501222	-0.520034563	-0.663782572	0.249434885	0.21929616	-1.130102956	-0.025728149	-0.796287939	-0.125223145	-1.586698425	-0.011162065	0.316269529	0.831778049	-1.060161102	-0.78329073	-0.410226425	-0.081318521	-0.058370913	0.047265192	0.714517206	-0.641124152	-0.392746336	-0.059856167	-0.10280822	-0.341786331	0.36824772	-0.062088192	-0.138917299	-0.040509543	-0.485320333	0.179567769	0.01222497	0.308733919	0.302250437	1.582416089	0.431067875	-0.305438794	-1.300483705	-0.64207391	-0.26188438	NA	-0.064751877	NA
151	-0.215547475	0.141586364	0.782439288	-0.159934038	0.021174235	-0.079909383	0.815497548	1.353822821	-0.225020311	0.159223506	-0.571106555	-0.661648514	0.347058857	-0.792304752	-0.102254234	0.079919623	-0.395415772	-0.065498982	0.336686499	-0.28595024	0.484461114	-0.282230294	0.195484543	-0.319516796	0.061941402	-0.222019184	-0.520707624	-0.091019398	-0.391118514	0.229443664	-0.288749308	0.28720696	0.231349788	0.109840466	0.232063649	0.614590868	-2.05494407	0.854670615	-0.067315707	-0.132046781	-1.024154378	-0.073754189	0.078718755	-2.412399959	-0.388607991	-0.834250022	NA	0.274900738	NA
152	-0.595476153	-1.239599982	-0.619339253	NA	NA	-0.276808076	-0.925583779	-0.354676941	NA	NA	-0.836786631	-0.546452801	0.760899283	NA	-0.618596449	-0.449887326	NA	-0.118108088	-0.030768534	NA	-1.84010973	-0.93623837	-0.548008415	-1.009228728	NA	-0.366004039	-2.269150317	-1.378326191	-0.371063681	-0.740658163	-0.620268535	-0.107807953	-0.71539279	NA	-0.826678573	NA	-0.355532739	-0.626610657	-0.709479835	-0.583396317	NA	NA	-0.896488105	NA	-0.809456303	0.169911537	-1.200977295	NA	NA
153	0.762813159	1.134172464	-0.578390943	0	NA	0.234281296	0.217205959	1.104362392	NA	NA	0.543079819	0.524077429	NA	0.322011033	-0.166408838	0.236888653	-0.007024615	0.45444573	0.557041048	-0.431706419	0.436705344	0.068219239	0.010346292	-0.194070304	NA	0.261902619	NA	-0.017044435	-0.361256853	1.62440534	0.608079368	NA	0.575039092	0.024107075	0.498408854	0.009257021	-0.366292473	1.182033897	0.004290781	0.002596626	NA	-1.060449828	0.186230573	-0.977102871	0.481623358	0.168645126	NA	1.409595763	-0.360826406
154	0.026349775	-0.032419891	0.328512067	0.80307724	-0.276939976	-0.213936071	0.451203	0.070738015	-0.6923475	-0.326700139	-0.78329073	-0.925836145	0.295650242	-0.779576909	0.108405874	-0.916540763	0.793942291	0.288032011	1.278848339	-0.179485582	-0.089268468	0.158967631	0.530039843	-1.002393431	-0.106138596	-0.057417271	-0.31416295	0.064663513	-0.125676608	0.095128345	-0.293297811	NA	-0.021325787	-0.047720736	-0.05245186	0.759309383	-0.027988037	-0.046777192	0.139848895	0.098215047	NA	-0.155017722	-0.142255048	-0.719285838	-0.873710284	-0.533753128	-1.00731013	0.258356243	NA
155	0.022348404	0.125045489	0.441218278	0.512763744	NA	0.095764622	0.079365555	0.313349819	-0.369181396	NA	0.520934358	NA	0.285855405	-0.249615872	0.142627398	0.184735308	0.989504018	0.730924545	0.65938355	0.602401567	0.295575835	0.0605305	0.052117954	0.031207927	0.030820142	0.251847619	0.08213283	0.025277807	0.084065375	0.010247316	0.094764576	0.564347433	0.018625464	NA	0.205061044	1.815720107	0.170164627	1.239967165	0.008662373	0.095219267	1.182892161	0.102195512	0.164666622	0.112524791	-0.347715203	-0.18224156	-1.812778836	-0.262924421	NA
156	0.243495048	0.876384984	-0.097943644	-0.068707198	0.106879362	0.47380888	0.30910104	-0.143754904	0.092943746	-0.050661915	-0.322687682	-0.362261951	NA	-0.39660448	0.055245474	-0.123524486	-0.011768984	-1.317514846	-1.338266392	-0.062194604	0.098486947	-0.126584152	-0.049190244	-0.01399751	0.279901885	-0.367158274	0.099935829	-0.271677498	-1.026663789	0.001099395	-0.045834536	0.054109326	-0.116646182	0.004091618	0.236651901	0.95057621	0.489622416	0.898086027	-0.436646226	0.093308177	NA	-0.533753128	0.19909673	0.170333317	-0.134102985	NA	0.240826286	-0.704410373	NA
157	-0.008334637	-0.220148042	0.266432899	0.420879034	0	-0.03448793	-0.468724448	0.081119051	NA	-0.161225648	-0.317866404	0.138456743	-0.162636583	-0.165936528	0.095764622	0.34818904	-0.05087233	0.207014169	1.246601166	0.606608419	0.069899127	0.113060792	0.202940844	-0.043638457	0.296988632	-0.208254939	-0.036352829	0.281487928	-0.003205131	0.139153061	-0.255150347	0.235704333	-0.014200349	-0.45413028	NA	-0.202361012	-0.302863394	0.568886963	0.059777204	0.002895803	-0.644166558	0.00548493	0.023423515	NA	0.147557564	-0.327532317	0.224742273	-0.128174339	-0.421137278
158	0.507419831	0.411049486	-0.913793852	NA	NA	0.351994005	-0.507497834	0.268575703	0.039989648	1.054242341	0.290577876	0.941919492	NA	1.204652573	0.092488019	-0.964955904	NA	0.158967631	0.195484543	-0.288348961	0.098939948	0.256500955	0.212284808	0.010544214	0.096037188	-0.001601281	-0.27641248	-0.072570693	0.25727441	0.425006263	0.064382259	0.067471715	0.023325825	0.327719759	-0.120586963	0.259282598	0.572954995	-0.010151351	0.065319466	0.242397008	NA	0.490112582	-0.003004509	-0.141563564	-0.183322057	-0.625301634	-0.13159042	0.570244813	NA
159	NA	NA	NA	0.611882894	0.050122609	-0.497251504	0.680770909	0.519983562	-0.170906952	NA	NA	-0.03469497	NA	-0.119572135	NA	NA	0.495549536	-0.264356247	-0.686171567	NA	NA	NA	0.023521195	0.342525308	-0.131248287	NA	NA	NA	0.464614132	NA	NA	-0.253860524	0.167207919	0.439866535	NA	1.382687866	0.389471218	-0.14618251	-0.471444667	NA	NA	0.14461969	NA	NA	NA	NA	-0.232310439	NA	NA
160	0.469753598	1.131853622	0.02644717	NA	-0.324484379	-0.599292605	0.484461114	0.67523776	0.17008027	-0.090690865	0.02887896	1.543917576	NA	0.210504008	-0.088940509	-0.13056437	NA	-0.006118681	-0.071281202	-0.107362518	0.669008165	-0.168892136	0.037681067	0.001598721	0.397701717	0.258279008	0.093125978	0.066817173	0.348047837	0.216642465	-0.203708639	0.21640087	0.302028666	0.242318531	0.181487876	0.962487059	0.107238751	-0.211709174	0.233093882	0.210504008	-0.075801713	0.513960704	0.198604927	-0.113728765	-0.078177781	0.027031339	0.405865028	-0.59511344	NA
161	-0.126470664	0.314518726	0.379805361	-0.418094525	-0.741917345	-0.259548233	-0.407817874	-0.621198681	-0.063365876	-0.158058305	0.260053905	1.012073527	NA	-0.409021424	0.098305689	0.067752102	-0.181282097	-0.084360349	0.339254078	-0.027988037	-0.011162065	-0.056993722	-0.220646671	-0.186088643	-0.006722546	0.656690644	-0.175187068	-0.360682965	-0.511826124	0.160501897	-0.327116142	NA	-0.47320876	-0.232184296	-0.352398387	-0.119910297	0.111541375	-0.847231196	-0.167827111	0.077516442	0.705619082	0.354592778	-0.18452398	-0.217037233	-0.274173722	0.008662373	NA	-0.489227224	NA
162	0.237756264	0.226019412	-0.171381617	0.365406711	NA	-0.55321134	-0.187535124	0.093945613	-0.053400777	-0.590590592	0.124250962	0.596526142	NA	1.055495998	-0.098936748	0.096672887	-0.219774234	0.115291044	0.481746906	-0.107696575	-0.342772039	-0.094640404	-0.013287894	-0.209363928	0.113150098	0.162628923	-0.342631164	-0.006420568	-0.294773826	-0.22614806	-0.229035877	-0.129880921	-0.132617525	0.464551292	-0.421899415	-0.369036751	0.246547529	0.739076112	-0.056993722	-0.008838949	NA	0.160842525	0.002995509	-0.667479434	0.155464103	-0.460766424	0.678845396	NA	NA
163	0.058646195	0.894167815	-0.219649662	-0.718875329	-0.883581557	-0.727324632	-0.629796865	-0.897468978	0.030432207	NA	0.6249754	-0.642644198	1.094871969	-0.081535488	-0.095080206	-0.080667903	-1.601469743	0.247484883	0.12363256	-0.566690757	0.661088757	-0.222268934	-0.019080888	0.06325645	-0.066460367	0.586396811	-0.465215113	0.008959741	-0.099488899	0.706310167	-0.005816885	0.915970681	-0.376440429	-0.956331781	-0.72505073	-0.301780997	-0.150241663	1.16268195	0.153064376	0.230317755	0.955396054	0.667162484	0.119647962	-0.02388294	-0.110373057	0.236020289	NA	NA	0.105530501
164	0.289979432	0.465744572	0.583945966	-0.620454495	-0.494296322	-0.472566912	0.30924785	0.002596626	0.018429135	-0.382579004	0.268652147	-0.243601393	-0.352540645	-0.071818288	0.436963775	0.367901688	NA	-0.084033996	-0.337572842	0.109392377	0.123809286	-0.093322157	-0.023985363	0.082317042	0.111004558	0.25176988	0.185981518	-0.228156093	0.172355392	0.176303484	0.040373894	-0.256054215	0.310348243	0	0.264055142	0.024985253	-0.14989309	-0.101036544	0.307631748	0.229602646	-0.861329174	0.204490663	0.151002874	-0.059962341	-0.184764538	0.293117275	0.065413139	0.168307145	-0.001200721
165	-0.161225648	0.465619031	0.267734435	-0.88140633	NA	0.122748465	0.149712273	-0.069993372	0.091575943	-0.757365753	0.19647098	0.244905043	0.179985497	0.639535411	0.064850972	-0.001901807	-0.835171681	-0.476424197	-0.492494667	-0.475619368	0.011928571	-0.323240168	0.012521281	-0.131248287	-0.026343975	0.515454892	-0.03978087	-0.136507245	-0.369760183	0.015085637	0.06137728	0.466121102	0.030820142	0.184070027	-0.008738066	0.522773957	-0.169602784	-0.408419468	-0.000700245	0.103729186	-0.703601638	-0.028605257	0.063162575	0.050312814	0.219537056	-0.04940035	-0.417790758	0.204083049	NA
166	0.412639312	-0.902387827	0.689691216	-0.194191729	-0.389345726	-0.248204982	-0.200526261	0.015774919	0.017152059	-0.059962341	-1.000759889	0.816647177	-0.130450429	0.40239373	0	-0.301780997	-0.827364523	-0.341082849	-0.395712817	-0.008637193	0.061189168	-0.234204499	0.395751416	-0.324346057	-0.113280686	-0.535118316	0.106609735	0	0.276570568	0.001598721	-0.283424482	0.548352596	-0.063578982	0.355013565	0.220339624	0.426051742	-0.031697087	-1.178305058	0.082961521	-0.01136433	0.761132878	0.211151938	-0.059113264	-0.619153501	-0.14317777	-1.063052113	-0.050661915	-0.539739634	NA
167	-0.13857265	0.583053258	0.105170498	-1.265848208	-0.713758134	-0.304218041	-0.445662298	0.319544046	0.033821548	-0.219774234	-0.138457793	NA	NA	-0.648747593	NA	0.36852446	NA	0.388183301	-0.005213567	-0.279449388	0.158797012	-0.07763727	-0.541113025	-0.500545314	-0.34418188	NA	0.093399264	-0.347007539	0.21985816	0.109661254	-0.405115169	NA	-0.099488899	-1.16860566	0.490296333	0.393527471	-0.143985851	1.140233963	0.217769135	-0.089487167	NA	NA	0.017446914	-1.170860453	-0.071066448	-0.534435489	NA	NA	NA
168	-0.291020974	-0.356960699	0.020488666	-0.197475805	NA	-0.16110816	0.119736682	NA	-0.397645759	0.870665554	-0.433710274	0.777718082	NA	NA	-0.214803427	-0.254763226	-0.996416776	0.301437038	0.322083499	-0.390379471	-0.606419177	-0.576609364	-0.177214619	-0.151055475	-0.272859144	-0.662617976	-0.5730557	-0.253989431	-0.27641248	0.250836536	-0.618225254	0.114577905	-0.203340924	-0.407366915	0.136190354	0.529568867	-0.246412178	0.882361594	-0.535630743	-0.099599365	NA	-0.23395175	-0.127606125	-0.358247608	0.183071276	-1.308963018	-0.659712404	-1.123314901	NA
169	-0.001701447	-0.00250313	-1.051824127	0.618531387	NA	-0.34757363	0.56104334	-0.582142623	0.228409661	-0.11518641	0.293713845	-0.01136433	-0.07396952	-0.477229674	0.134880482	-1.175385347	0.616590058	-0.286482792	-0.249359198	-0.097171912	-0.101700555	-0.565105831	-0.183081846	0.11680478	-0.224895084	-0.381114017	-0.081101601	-0.284088537	-0.265268478	0.237361989	-0.152918106	0.022446189	0.106969221	0.37411203	0.039605255	0.414292697	-2.518256629	-0.291154762	-0.001901807	-0.130222587	-0.241816817	0	-0.02306394	-0.160168752	0.23956793	NA	-0.533753128	0.781661594	NA
170	0.255726901	-0.01440323	0.869869759	NA	NA	0.274520842	-0.249744233	-0.142370341	0.121332285	-0.194070304	0.03575317	-0.45870767	NA	-0.268533254	0.093672476	-1.766091722	NA	0.129008681	-0.142600969	0.332464215	0.364712556	-0.004008021	0.166022784	0.151776435	0.15280692	-0.340098805	-0.255408512	0.160757379	0.234360407	0.165853364	-0.010858743	NA	0.621543762	NA	0.037777364	0.955319119	0.28855669	0.715593369	-0.342631164	-0.103917113	-0.940583424	-0.09145761	0.367347786	0.080196542	-0.203463481	NA	0.5611004	NA	NA
171	0.342454308	0.214708072	-0.18248157	-0.3878708	-0.482886255	1.618675118	-0.365427421	0	-0.245133569	-0.160638346	0.031498667	3.690607959	0.279448268	-0.265529268	-0.603306477	-4.947660495	-0.341927087	-0.631675858	-0.209363928	-0.005113049	0.176051944	0.058929068	-0.073861849	-0.075046874	0.124692444	0.03575317	0.260285182	-0.199427025	0.072041553	-0.093431945	-0.262664309	-0.11171399	0.072227634	0.063913326	0.201143311	0.365684238	0.481870439	-0.639796005	-0.088394151	0.00548493	-0.44036716	0.287131921	-0.022347864	-1.34822816	-0.070315174	-0.386103755	0.712998826	0.877965618	NA
172	0.389267973	0.158967631	0.111988502	0.088102448	NA	0.004290781	0.053730322	0.163648292	0.509644927	NA	0.048885398	0	0.430482871	0.6090588	0.168560642	-0.693947501	-0.396158549	-0.016231013	0.202859208	0.064476019	0.656327582	-0.224519497	-0.265920581	-0.337572842	NA	-0.442232832	-0.073861849	0.403329496	0.191446465	0.251381093	-0.072248164	-0.4547604	-0.234204499	-0.509160344	0.543660607	-0.148036079	0.003593536	0.086819692	0.022152805	0.203512109	NA	-0.089268468	0.167292518	0.163818085	-0.083599024	-0.896978421	0.601579987	0.331459695	-0.252958636
173	-0.090690865	-0.55321134	-0.636577829	-0.441455046	NA	0.368870278	-0.079909383	NA	NA	NA	-0.690550555	-1.344768614	NA	-0.847464541	-0.360539545	0.608405952	NA	0.257429029	0.102285794	0.120623442	0.143234168	-0.316904931	-0.137654165	0.254797245	-0.128401715	-0.702389762	-1.308222826	0.17580034	-0.197841368	0.1645818	0.069992372	NA	0.107598011	-0.012275031	-0.391562203	0.718522487	0.062129371	0.794891164	-0.0438474	-0.024395157	NA	-0.108030744	0.018429135	-0.00080032	0.16135325	-0.150357882	-0.277863764	-0.504843552	0.118493894
174	0.081026839	-0.40137349	-0.389640973	1.605289319	NA	0.162883863	0.323459364	-0.181521877	0.031983046	NA	-0.054350595	-0.819164021	0	0.075663904	0.017643435	-0.327393573	1.362334605	-0.131704491	0.165175398	0.050027494	-0.159112972	-0.780667778	-0.116758561	-0.212450922	0.083605584	-0.625488532	-0.777616337	0.031110995	-0.028296599	0.273304205	-0.074723546	0.311447426	0.339467746	0.352134652	-0.133302847	1.045738799	-0.125449851	-0.786140047	-0.261494643	0.254099435	NA	-0.324346057	0.166022784	-0.254118356	0.073157521	NA	0.374455921	-0.079259681	NA
175	-0.339536928	-0.243728985	0.002097798	0.571544359	-0.138917299	-0.363268059	0.190207051	-0.419766893	-0.182721637	-0.242708707	NA	-0.600932697	NA	-0.172094037	0.326061085	-0.305031711	0.438319445	0.610906225	0.386282289	-0.817350784	-0.015215166	-0.140987693	0.03449804	-0.842807955	-0.094090923	-0.564929883	-0.419158435	-0.157004749	0.685467769	0.181654668	-0.472406514	-0.495608658	-0.226524259	-0.336872317	0.314956715	-0.204199135	0.013014937	0.130677324	0.092214484	-0.2125746	NA	-0.186209104	0.019018006	NA	-0.127038233	0.653366311	-0.500875293	-0.284753033	-0.078394067
176	-0.044160896	-0.407517212	-0.996687669	-0.939559359	NA	-0.256312613	-0.920047781	-0.855195633	-0.013896105	-0.039052727	-0.44488184	-0.60477007	-0.006722546	-0.056147161	0.315321558	-0.64055473	-1.048965349	0.050788167	0.4740579	NA	-0.360109406	-0.664365379	-0.11518641	-0.447694342	-0.508495008	0.078071535	-0.429860265	-0.2026059	0.348118441	-0.011060947	-0.68299885	-0.935728426	-0.313068259	-0.472406514	-0.432939085	-0.405865188	0.473435235	2.077326807	0.126280166	-0.054984308	1.158797598	0.244905043	-0.235469201	-0.434636485	0.144273489	-1.10292156	-0.845366394	-1.132582808	NA
177	-0.206286434	-1.090346544	0.980429173	-0.520034563	NA	-0.591493527	-0.909315118	-0.66067999	-0.592397277	NA	-0.93623837	0.56815069	0.55204434	-0.777616337	-0.148384006	-0.482238167	NA	-0.126811167	-1.094520671	0.640853386	-0.398688124	-0.162989628	-0.485482816	-0.214307703	0.024790169	-0.766363243	0.042101176	-0.612304793	-0.1537341	-0.398688124	-0.233572747	-0.13250335	-1.2772606	-0.400179104	-0.360252765	-0.71070034	-1.041287222	-0.6314878	0.180069022	-0.139262067	1.294727168	0.540636821	-0.564050607	NA	-0.364419139	-0.102143474	0.750377814	-0.567043304	-0.888189302
178	0	-0.413547684	-0.062301026	NA	NA	-0.2569589	0.040853994	-0.084795652	-1.103825856	-0.347432077	-0.27089051	NA	0	NA	-0.438349935	-0.036767724	NA	-0.627734042	1.028154058	-0.201259758	-0.060068526	-0.245900538	-0.089815304	-0.029943876	NA	-0.47176518	0.441282601	-0.317042228	-0.229538958	-0.017960325	-0.145835348	0.067378235	0.210341959	0.456601724	0.057230633	0.609276322	0.228807481	-0.788997506	-0.186811622	-0.004409708	NA	0.074457911	0.107059072	-0.239399974	-0.279978488	-0.714575128	NA	0	-0.892818376
179	-0.002102208	-0.49200387	0.153407547	0.071576198	NA	-0.169958298	-0.379797361	0.555033878	0.06241126	-0.004510155	-0.464578373	-0.554255182	-0.02081514	0.752830183	0.101563315	-0.136851183	-0.030149977	0.861792307	-0.165228479	0.049456609	0.013014937	-0.071818288	-0.354819523	0.02039069	-0.143754904	-0.850737101	0.032757564	-0.159347493	0.444621717	-0.242581245	-0.027885203	NA	0.451966942	-0.458549479	-0.053928342	0.013804281	-0.353964335	1.488106087	-0.331424995	-0.323378337	NA	-0.086647807	0.041525747	0.178564508	-0.799619425	-0.564402225	-1.059583902	-0.927351679	NA
180	-0.333237474	-0.656429598	-1.169249368	1.096075741	NA	-0.643785751	-0.762068626	-0.570044983	-0.058688996	-1.030299648	0.475302068	1.231422588	-0.304218041	-0.427710717	-0.20138206	-0.128856622	0.585060731	-0.080884729	0.052497569	0.051738195	-0.666310527	-0.089487167	0.016758784	0.093581414	-0.186450067	-0.348565061	-0.283955691	0.017741681	0.076683225	-0.381114017	-0.021121497	0.136975455	-0.239272933	0.007868958	-0.965480976	-0.672756491	-0.230168166	-0.567748771	0.189131649	0.015282624	0.240983469	0.282166892	-0.263054503	-0.17387731	-0.63544447	-0.610830138	-0.30870144	NA	NA
181	0.458879485	0.158882325	-0.212079979	-1.188427593	NA	0.077701508	-0.146993024	NA	-0.030459207	-0.276939976	-0.543521007	-0.003606496	NA	-0.046567636	-0.062833309	-0.032316601	NA	-0.218778094	0.028587457	0.031207927	0	-0.047301273	-0.247308178	-0.448790233	-0.223768747	0.778085577	-0.075909594	-0.011465478	-0.113728765	0.172692008	0.354662921	0.731887009	-0.1420245	-0.038325114	-0.559315833	-1.272965676	NA	0.607861586	0.308440126	0.142540687	NA	-0.600021203	-0.082186671	-0.005816885	0.125574823	-0.10192199	0.10300775	-0.356817811	-0.793409602
182	0.070458464	0.170417652	0.780058553	0.817618908	NA	0.853734245	0.085902429	0.402259977	-0.256183405	-0.170669704	0.236967558	-1.413049098	NA	-0.704208128	-0.184163252	-0.428324402	0.814568036	-0.269711187	-0.664171072	0.005982072	0.228887026	-0.257734996	-0.113056722	0.075942004	-0.198572897	0.517185358	-0.415666971	-0.118445755	-0.182361558	0.267581401	0.114845392	-0.087520598	-0.257993829	-0.294639553	0.145830448	0.194579454	0.246000333	-0.010353412	-0.177811741	0.05921186	NA	-0.182001608	0.168645126	-0.173401459	0.348894757	-0.742547531	-0.857314527	-0.035938107	NA
183	NA	-0.62735944	0.626686814	-0.094750337	-0.77479117	-0.177811741	0.209855657	NA	NA	-0.134331713	-0.591312875	-0.374838915	-0.002603386	0.28570512	0.107598011	-0.042281392	0.27010347	0.605408266	0.818677903	0.327143141	0.066723632	0.248811298	0.210828026	0.286531411	0.352204968	-0.637334116	0.104089709	0.086361166	0.100297721	0.13155444	-0.415666971	-0.326700139	-0.370628993	-0.384486702	-0.233193887	0.149712273	-0.245900538	2.006386861	-0.15466748	0.026349775	NA	-0.647218249	-0.094860281	0.275052656	-0.08077631	NA	-0.797175251	NA	NA
184	1.10714247	0.001898197	0.058551887	0.300400845	0.270408744	-0.082729648	-0.066460367	-0.395267283	0.112256682	-0.46140074	-0.154200681	0.615563946	-0.310746012	2.051260665	0.147471279	0.9722551	0.483289974	-0.422662133	-0.51852183	0.549969411	-0.389936306	0.040565962	0.303653842	-0.115635344	-0.133188594	0.470878247	0.339254078	0.076312683	-0.328226328	0.10858531	0.190868263	-0.280905088	0.412837862	-0.15082289	-0.705219762	0.038451186	0.83832919	-0.880441079	-0.070744405	-0.035523556	NA	-0.720107362	-0.124543335	NA	-0.201626708	-0.033143219	0.362627194	3.521433702	-0.613412213
185	0.52532007	NA	-0.458549479	0.510545585	0.095764622	-0.094640404	0.206851555	-0.53034829	-0.140527235	-0.170669704	-0.529838563	-0.260196616	NA	-0.19650162	0.24043322	-1.05010788	0.220339624	-0.549220012	0.546906798	0.195402296	-0.024087796	-0.075478141	-0.153500891	-0.065605757	0.066723632	-0.865597618	-0.027576768	0.065787741	0.017152059	0.08222494	-0.278259934	-0.226524259	-0.235342659	0.299141166	-0.118783536	-1.648698626	0.240669078	-1.179605448	-0.367302647	0.050312814	-1.264430773	-0.893795654	-0.189467025	0.116092719	0.100659483	NA	NA	0.439802121	NA
186	0.270790205	-0.120586963	-0.342631164	-0.701380985	NA	-0.496922719	-0.801846597	-0.192856859	-0.065819341	-0.726083681	-0.36686959	2.412774929	-0.132046781	-0.627921396	-0.018265809	-1.187771425	-0.558266698	-0.333097936	-0.183922838	-0.364275181	-0.55739326	-0.300024596	-0.236862223	-0.629233855	-0.514499029	0.160246349	-0.212079979	-0.261624538	-0.312658059	-0.319654452	-0.503684516	NA	-0.536485371	-0.800287056	-0.23483665	-0.359249684	-0.089159136	-0.458549479	0.046788161	-0.043325125	-0.30734071	0.040661982	-0.220272676	1.00E-04	-0.579282924	0.040853994	0.314080546	2.093517016	NA
187	-0.097502581	-0.563347743	0.455587718	-0.998585975	NA	-0.302863394	-0.08872193	0.186147562	NA	-0.101589856	-0.400029906	0.060342229	-0.519866368	-0.700171795	-0.420223479	0.99868145	NA	0.332177312	0.154779054	-0.843505062	-0.208624465	-0.198816859	-0.407216641	-0.892330094	-0.608989873	-0.043429558	-0.334214787	-0.017858518	-0.09783336	0.487045095	-0.202973345	-0.711107506	-0.327116142	-0.83149013	-0.071388596	-0.17578298	0.17462535	0.844021069	-0.04447449	-0.05234648	NA	-0.225020311	-0.203340924	-0.171025597	-0.100704704	-0.460766424	-0.337713006	-0.611567194	-0.088394151
188	0.009851316	-0.39988073	-1.017493237	-0.506003933	NA	-0.289016295	-0.573942933	-0.105582763	-1.501032039	0.407596169	-0.689553645	1.885477473	-0.316355933	-0.105805059	-0.055407007	0.045928932	NA	-0.024087796	0.032757564	0.0978524	-0.201015199	0.036331929	0.001299156	-0.403616817	-0.21716148	0.079457921	-0.679441534	-0.049085208	-0.155368087	-0.025215249	0.118138528	-0.307748735	-0.389936306	-0.403167749	-0.379066634	-2.198225078	-0.041655675	0.464237034	-0.119797563	-0.144101344	NA	-0.041864204	-0.2269006	-0.779140894	0.359979478	-0.736681183	NA	-0.066674133	NA
189	NA	-0.84397007	-0.176737179	-1.551169004	NA	-0.539739634	0.106160196	-0.52087596	-0.509659637	0.344156919	NA	0.76839379	NA	NA	-0.661260992	-1.422128814	NA	-0.467127769	-0.677470701	NA	-0.949589017	-0.550779939	-0.116758561	-0.492331041	-0.049295292	-1.218071729	NA	-1.352472813	0.066910705	-0.358533813	-1.169571378	NA	-0.453815369	-0.193948893	-0.426484475	-0.093981063	-0.02306394	-0.990744918	-0.023780529	-0.291690094	NA	-0.21109147	-0.744019511	NA	-0.429860265	-0.529329095	-0.215175382	NA	NA
190	-0.590049223	0.400318554	-0.044056386	NA	NA	-0.483696956	-1.006762635	-0.340379861	0.178480857	NA	-0.477229674	-0.038740828	0.119381757	0.960460716	-0.554603371	-0.821207851	NA	0.507419831	-1.09243143	0.124692444	-0.967057849	-0.045415864	-0.217534313	-0.128970381	-0.115410852	0.155378497	-0.645309851	-0.393487131	0.958391908	-0.799174585	-0.296790091	-0.539225098	-0.407667532	0.077146209	0.024692613	NA	-0.164403056	-0.412036653	-0.241944181	-0.031387473	-0.515335779	-0.291823972	-0.279052746	NA	-0.806539868	-0.796066235	0.009356095	NA	NA
191	0.051358292	-0.561592741	-0.69214768	-1.310445049	NA	-0.529329095	-0.502361545	-0.673148494	-0.247436244	NA	-0.919546025	NA	0.161693589	NA	-0.255537619	-0.625301634	NA	-1.470981169	-1.148853505	-0.388165611	-0.305167387	-0.228658732	-0.506833602	NA	NA	-0.730018655	-0.356103679	-0.728567126	-1.228265497	0.174709324	-0.134789326	-0.42694414	-0.753321904	-0.364419139	0.548063603	-1.915963073	-0.28621648	-1.60743991	-0.350550877	-0.183562326	NA	-0.755022584	-0.358247608	-1.151380354	-0.557044098	-0.861802547	-0.742337425	-0.32892082	NA
192	-0.497087098	-0.687165109	-1.667067025	1.063986337	NA	-1.511857584	-0.217410019	-0.744229971	0.256191405	NA	0.978514075	3.475797614	0.137237018	-1.114741671	-0.467606505	-0.573765424	1.024929867	0.340962142	0.321213556	-0.759928214	-0.267095439	-1.108662625	-0.284620098	0.254642218	-0.103584316	1.005180344	-1.229290612	-0.891598119	0.303506208	-0.56651453	-0.348706774	0.082409136	0.081856446	-0.285551011	0.001199281	-0.056464537	-0.380528623	-0.242963679	0.082777426	0	NA	NA	-0.468245176	NA	-0.291556234	0.080565648	1.149463819	NA	NA
193	-0.059962341	-0.457758903	0.590726783	0.283749349	NA	-0.051925073	-0.705017353	-0.338273859	NA	-0.367880348	-1.241674672	0.111362468	NA	-1.397962166	0.204164585	0.798002569	0.280279743	0.49573229	1.061394901	-0.320618573	-0.483210457	-0.335472736	-0.366292473	-0.52661631	NA	0.079642628	-1.005941954	-0.172331623	-0.032316601	0.055907632	-0.38890302	NA	-0.630548039	-0.429092039	-1.48943512	-0.009343515	0.49200971	1.289921116	0.079550279	-0.094970238	NA	-0.140527235	-0.411885676	-0.291288568	-0.217907285	-1.32275634	NA	-1.366491734	NA
194	-0.077313103	NA	0.243416656	0.048027969	0.858492113	0.000699755	0.140109708	0.74933846	-0.140066989	-0.063365876	-1.292075686	0.105170498	NA	-0.453972812	-0.240035419	-0.224018934	0.614049859	0.488580015	0.425137008	-0.191039447	-0.758859724	-0.258511695	0.052782185	0.010049336	0.256733054	-0.624927942	-0.024600117	-0.362693016	-0.000100005	0.120977927	-0.267879445	-0.411734721	-0.339817827	-0.187535124	0.035367144	-0.858493633	0.093854575	1.910771379	0.189545402	-0.201259758	NA	-0.232815171	-0.390527236	NA	-0.162518929	NA	-0.247564326	-1.087375657	NA
195	0.114845392	-0.072355662	-0.0329365	-0.333237474	NA	-0.003405793	-0.600203435	-0.52306691	-0.115747609	-0.176379247	0.047932654	-1.151380354	-0.176021444	0.507359624	0.086177696	-1.449447176	-0.656429598	-0.670798777	-0.494624244	0.17050198	-0.014301785	-0.147340588	-0.214307703	-0.209487225	NA	-0.27483166	-0.225270812	0.147126065	-0.07278577	0.12009148	0.001498876	-0.652773286	0.218653486	NA	-0.080126044	0.353188875	0.059588791	-1.184170177	-0.249744233	0.132430787	NA	-0.535289096	0.031983046	0.472874504	-0.098164249	-0.501700716	-0.132617525	NA	-0.392302122
196	-0.263054503	-0.177214619	0.284577257	0.248967231	-0.272596435	0.097761718	-0.361256853	-1.375156617	-0.212327259	-0.372949516	-0.951658876	2.353848387	0.49512298	-0.242071561	0.079273181	0.38662202	0.105440512	0.747303872	1.427963996	0.182154876	-0.438504962	-0.298540816	-0.335472736	0.270408744	0.034594645	0.448460739	-1.368454443	-0.107473858	0.180570024	-0.116646182	-0.378482437	NA	-0.246668096	0.173280812	-0.426790895	-0.025010163	0.587564418	2.178970084	0.146003294	-0.178767879	-0.187535124	-0.222518747	-0.171144256	-0.616186139	-0.2569589	0.663357852	NA	-1.465337568	1.036701423
197	0.342241278	-0.329198753	-1.752731082	-0.683989243	NA	-0.176498543	-0.567572358	-0.632240246	-0.412791883	NA	-0.279449388	-0.552516051	NA	-0.031387473	0.093125978	-0.604220971	-0.182121577	-0.574653287	-0.327532317	-0.132731712	-0.596201975	-0.101257832	-0.311565013	-0.109703265	-0.292359662	0.515454892	-1.402017322	-0.141794006	-0.208254939	-0.089596534	0.264439034	0.222503346	-0.554081132	-0.139147131	-0.05087233	NA	0	-1.15169666	-0.331424995	0.026739297	NA	-1.026943002	-0.149312403	-0.171619034	-0.755661086	1.388392159	-0.662617976	-1.000215967	1.234249795
198	0.262518099	-0.120474153	-1.941420244	0.20912576	NA	-0.192371893	0.057419491	0.323965785	NA	0.775095763	-0.885519073	0.347765371	0.175296942	1.19610191	0.047837329	-0.177811741	-0.181162229	-0.433247489	0.774450632	-1.175709339	0.374799694	0.29229641	0.150916885	-0.282097694	NA	-0.603123678	0.117783036	0.09276148	0.074457911	0.204327637	-0.310473161	NA	-0.076233306	0.227294922	0.342809258	-0.306932852	-2.338212271	-0.551647618	0.236415094	-0.13250335	NA	NA	-0.054245015	NA	0.299882346	-0.473529839	0	0.104450101	NA
199	-0.219898821	-0.552689828	-0.826221535	0.191529038	-0.402718882	0.066630082	0.379531726	0.362348817	0.078533878	-0.282628198	-0.614151174	-1.540378377	-0.029222859	-1.083822203	0.24826534	0.153922082	0.002995509	0.733809162	0.639588163	0.182404887	-0.317042228	0.058363243	-0.116309122	-0.683394889	-0.333377032	-0.331424995	0.328296045	0.025570276	0	-0.057205474	-0.478035801	-0.372949516	-0.343758719	-0.962858368	-0.879717752	-0.778051688	0.051833149	0.575545378	0	0.05259245	NA	-0.389788629	-0.272727781	0.335257213	-0.402718882	-0.832869124	-0.645309851	-0.583217121	NA
200	-0.129311736	-0.6680644	-0.142600969	-0.004108428	-0.051503843	-0.598564538	0.130501808	-0.524924548	-0.022859294	0.436963775	-0.669430654	-0.267748735	0.038451186	-0.292493629	0.099935829	-0.288082152	0.141586364	0.247875188	0.381172416	0.39904454	0.407928738	0.134356052	-0.131248287	-0.530858278	-0.057099592	0.035946127	0.416470987	-0.304624793	0.154007812	-0.098384902	-0.333097936	0.337471737	-0.14329317	-0.124656605	-0.109145447	0.641327432	0.377134218	-0.095850326	-0.24028971	-0.054033888	0.075200233	-0.494296322	-0.089377811	0.650083091	-0.207885549	-0.301780997	-0.033039854	-1.034511363	NA
201	-0.459024125	-0.427864103	1.666328513	0.858153015	NA	-0.199793303	-0.054033888	-0.804749357	0.075200233	0.183071276	-0.732095931	-0.24028971	0.104630249	-0.670212209	-0.058901108	-0.255537619	0.847626378	0.972633257	1.455213897	0.590061852	-0.461083532	0.329663395	-0.111937653	-0.148152041	0.147126065	0.430742915	-0.475941222	0.19803085	0.158967631	-0.100483539	-0.179605249	NA	-0.493640799	-0.490043085	0.132255579	-0.354106816	-0.108253585	2.674617505	0.360328262	-0.002402885	NA	0.101382614	-0.173996308	-0.118445755	-0.06592615	-0.641503947	-0.239527031	-0.596383512	NA
202	0.065038396	0.067845547	0.291624292	-0.442699795	-0.673932962	0.461530332	0.302176519	0.593382092	-0.003405793	NA	-0.185125484	-0.419158435	NA	0.890603625	-0.080993159	1.319085611	NA	-0.335752496	-0.269973139	-0.040301297	0.45362015	-0.111490376	-0.11518641	0.400385562	0.121686518	-0.162048452	-0.012781334	0.112524791	-0.42007126	-0.111490376	0.324471949	-0.232688964	0.183237804	-0.046253385	0.374249601	0.353610253	0.803525088	-0.093981063	-0.337292573	-0.147804195	-1.077633882	0.196717437	0.17462535	-0.085013374	-0.13056437	0.2786161	-0.496101228	0.373148507	-0.036352829
203	0.103097958	0.273988745	0.493231755	-0.981629573	-0.410377152	-0.298406036	0.265359773	0.351853339	-0.12397718	-0.21716148	-0.502031076	0.956088202	-0.707651867	-0.425871918	0.186728499	-0.336592244	-0.201259758	0.027906953	-0.065285467	-0.258900271	0.335471736	0.291026474	0.132430787	-0.028296599	-0.315944382	0.204164585	-0.187535124	0.023325825	-0.247308178	0.112256682	-0.054878662	-0.669040105	-0.029325829	-0.22752815	0.338185055	-0.113280686	-0.017960325	1.082923189	-0.054773026	0.122660013	NA	NA	0.164157586	0.22872793	-0.389345726	-0.576609364	-0.567925216	-0.983232138	-0.250514748
204	0.038066201	0.463671121	0.47660678	-0.023678127	0.496097698	-0.047825629	0.753348183	0.483166616	0	-0.978698192	-0.086429728	1.992534705	NA	-0.238130294	0.286831711	0.790772859	-0.463465052	-0.35982275	-0.200159715	0.264822778	0.282845395	0.278464723	0.195155515	0.156832794	-0.134560493	0.413565544	0.02810143	0.146089706	-0.14792013	0.046883586	0.250836536	0.298547826	0.209855657	0.426051742	0.041621675	1.744021252	0.204572166	0.005286004	-0.53034829	-0.00471108	NA	-0.191644884	0.036717583	0.355784548	0.355153788	NA	1.022450928	-0.100483539	NA
205	0.196388814	-0.182721637	-0.816897988	1.039039197	NA	0.157687276	0.021957167	-0.141333176	NA	-0.201137471	-0.382725621	NA	0.648934026	NA	0.158626363	-1.566857465	0.546269985	-0.505009238	0.01607018	-0.395415772	-0.145951055	0.031886189	-0.07980107	-0.275621758	0.082869478	-0.013287894	-0.395861372	-0.009444459	-1.079692404	-0.249744233	-0.457126891	0.013113639	0.161863715	0.275052656	0.284802932	0.121863588	-0.132617525	-0.136048844	0.156319754	0.21656194	NA	-0.239527031	0.0660686	-0.22752815	0.160501897	-1.059583902	-1.84136997	-0.352398387	NA
206	-0.392598242	0.103368533	0.353540035	0.057608313	NA	-0.722781986	0.016857117	-0.668259465	0.008265744	NA	0.213497174	-0.03448793	-0.081210055	-0.19309943	-0.17304472	0.351290474	-0.816219178	-0.326977455	-0.519698202	-0.204567166	0.157345571	-0.149776925	-0.549566452	0.055340095	-0.14317777	0.302102595	-0.382725621	-0.514666323	-0.022654691	0.21390097	-0.151753555	-0.239654103	-0.071496002	0.031595562	-0.331703625	-0.293431904	-3.291446518	-1.17993081	0.008464078	-0.048665172	-1.172474137	0.05230778	-0.001901807	-0.156419919	0.011632084	0.084341148	-1.054691102	-1.043840053	0.204653662
207	0.010841023	0.666957197	0.18548322	-0.453185844	-0.225772003	-0.156302994	0.54893033	-0.288882793	NA	-0.078718585	-0.334494194	-0.244367188	-0.084686808	0.146953413	0.214223889	-0.595476153	-0.863935502	-0.576431381	-0.116983355	0.059117604	0.088102448	0.037295785	0.203104096	0.031789322	0.365822973	0.052023028	-0.141678778	0.023814178	-0.110931561	0.048027969	0.076961041	0.440252934	0.535966916	-0.647218249	0.088010877	-0.10280822	0.442953553	-1.354408172	0.199342541	0.245139849	NA	0.319979839	0.112167297	0.561499726	-0.357389485	0.236967558	-0.467766134	-0.562469857	NA
208	-0.0329365	-0.642454066	-0.254634218	0.432496447	-0.299080117	-0.056041391	-0.577856136	-0.227653707	NA	-0.729188952	0.193179067	-1.416341282	0.813194318	0.155977581	-0.198938863	0.352767319	0.333754261	-0.385515433	-0.326145739	-0.608622225	-0.424495034	-0.323102018	-0.079043207	0.032660782	-0.114064956	-0.13079229	-0.190313407	-0.078610401	0.272390754	-0.128515422	0.044112575	0.572673027	-0.492985706	0.656898048	-0.893551245	-0.328504067	-0.14329317	-0.456179623	0.323386997	-0.056041391	1.699406579	0.19004168	-0.012781334	NA	-0.459815703	-0.156186083	-0.042907501	-0.497251504	NA
209	0.173196718	-0.684187439	0.273684563	-0.510658971	-0.488412029	0.249356958	0.329735309	1.286280637	0.085443482	-0.624741148	-0.816219178	0.84766922	0.405998299	-0.578390943	0.098305689	0.422780986	-0.022347864	-0.454602833	-0.364131245	0.195813464	0.109123427	-0.09014355	0.221862731	-0.350834887	0.2112329	-0.412640792	-0.14064233	0.009455159	-0.279449388	0.015184135	0.03979747	0.174541369	0.426312941	0.434441216	0.413433278	-0.158644093	-1.774902352	0.003095205	-0.485970423	-0.17888746	0.068592791	0.400921468	0.241690489	0.345148772	0.01597177	-0.334494194	NA	0.482302685	-0.70623242
210	-0.146993024	-0.128856622	-0.723194102	-0.221769496	NA	0.251536626	-0.255279421	0.097126711	0.070831181	NA	0.051643233	-0.966269102	NA	-0.296386513	0.02508278	0.018625464	0.047646653	-0.517514612	-0.71070034	-1.039871794	0.007868958	-0.264486515	-0.003004509	0.045928932	-0.116870952	0.27543235	0.019900662	-0.193584749	-0.265138108	-0.16134315	-0.116196794	-0.30652516	-0.099820335	0.255184707	-0.480458087	0.054677561	-0.524924548	-0.565105831	-0.135361638	-0.069564463	0.833213424	-0.107139876	-0.020202707	0.330741562	-0.006823225	NA	0.459763882	-1.567816238	NA
211	0.474244624	-0.124543335	-0.789217649	-0.131134268	NA	0.194332469	-0.321169917	-0.200037563	-0.548354436	NA	0.333467728	-1.166998202	-0.181761714	NA	-0.44347855	0.391839365	-0.543693227	-0.900417383	-0.416880011	-0.30924625	0.254564696	-0.365427421	-0.224269185	-0.204812595	NA	0	0.088468648	-0.007528266	-0.127151786	0.318599175	0.185233978	-0.228030473	-0.284620098	0.357254776	0.119115481	0.433469305	-0.57874764	-0.84397007	0.374868434	0.154264959	NA	-0.346159002	0.111899092	-0.088612658	-0.074831311	-0.153034636	-3.600868577	0.200079612	-0.089268468
212	0.091302158	-0.207516295	-0.568807906	-0.776963667	-0.538025544	-0.360252765	-0.464419251	0.175464769	NA	0.03854741	-0.634312395	-0.316904931	-0.047406122	-0.352540645	-0.437110586	-0.217285742	-0.812155967	-1.521885015	-0.241307522	-0.384927457	0.538129458	-0.215547475	-0.000500125	-0.412187654	NA	0.078164021	0.04859967	-0.189708775	-0.769812265	-0.331146444	0.110198792	-0.43139849	-0.321032052	-0.239272933	0.053066721	0.272466907	0.250135956	-0.333516609	-0.020100672	-0.046043939	-0.417487083	-0.29961971	-0.049715592	0.496523839	-0.236862223	-0.17007683	0.087736114	0.517900537	NA
213	0.254409633	-0.505009238	-0.342208658	0.320415442	NA	-0.363843433	-0.277071893	0.19909673	-0.066353501	1.137576559	-0.261624538	-0.139377016	-0.018469516	0.27748021	0.001998003	0.017839918	0.244748475	-0.558791128	-0.664171072	-0.552168587	-0.224519497	-0.066781034	-0.215795614	-0.615260642	-0.230545881	-0.148036079	0.016955441	-0.410226425	-0.394228476	0.074550731	0.117871921	-0.146761381	-0.198328995	0.682086233	-0.780231287	0.44743844	-0.13547614	-0.131476363	0.169320745	0.182738137	0.019802627	0.100478619	-0.065498982	0.317507829	-0.203340924	-0.491513313	-0.525431776	NA	-0.447537885
214	-0.320343015	0.031886189	0.759356181	0.506636863	NA	-0.074939087	0.385194371	-0.147456469	0.3152486	NA	0.569056795	-1.216720377	0.156747306	-0.994252273	-0.0010005	-0.386692423	0.635306181	-0.233572747	1.104030915	0.198850859	0.095491981	-0.308156926	-0.084904507	0.227693186	-0.022143365	0.744220451	-0.689553645	-0.126243727	-0.07396952	0.099935829	-0.014910613	0.174373387	0.195895677	0.228568808	0.149109423	0.437803216	-0.189950584	-0.406765954	0.30498157	0.173701175	1.293027093	0.119825393	0.191446465	-1.011975982	-0.597109992	0.487536526	-0.823483682	0.136626598	-0.015215166
215	0.022348404	-0.130336502	-2.775793853	0.308954208	NA	0.315759195	0.332177312	0.196306641	-0.364419139	0.90729035	-0.535972506	3.812854391	0.743887822	-0.321859524	-0.01065658	-0.839561199	0.560815069	-0.773706688	0.225301222	-0.534606152	0.204246114	-0.296386513	0.030141157	0.049171044	NA	-0.436336772	0.111541375	-0.022859294	-0.664754106	-0.025522957	-0.19334206	0.035174075	0.363531385	0.456601724	-0.790980541	-0.611014351	-0.220272676	-0.450201002	0.121243707	0.01242252	0.358652986	0.533682406	0.164327293	-0.428784913	0.080196542	-0.553733125	1.032330026	0.033241334	-0.450201002
216	-0.695750566	-0.661842331	0.001598721	-0.713758134	0.158967631	0.440252934	0.317362227	0.21760826	0.218010399	-0.30598183	-0.201871416	NA	-0.14317777	-0.345452438	-0.17805069	0.361861471	NA	0.396962396	-0.47176518	-0.053822807	0.003493889	-0.400626831	0.099754833	-0.066460367	-0.007528266	0.169236317	-0.050030934	-0.129880921	0.341033248	-0.038325114	0.16509062	0.684409115	0.010148331	0.581097677	-0.378774493	0.514976995	0.227055888	0.361025467	0.183487543	-0.226398844	NA	0.593437336	-0.023575737	NA	-0.163578314	-0.139836945	0.62732784	-0.56651453	NA
217	0.133656385	0.509104143	-0.208131794	-0.350266948	NA	0.072413681	-0.138228119	-0.016942721	-0.206286434	0.207501855	0.324544237	-0.414758155	0.045068963	-0.175187068	0.255107227	-0.107251191	-0.482238167	-0.146529793	0.975879523	0.044112575	0.226657371	-0.198572897	-0.081969563	-0.01440323	0.131203686	0.572052417	0.189379921	-0.209610537	-0.099268002	-0.081535488	0.419893845	0.213820224	0.099845335	-0.032213322	0.608569204	0.006677655	-0.113392687	0.384445741	0.112256682	-0.005414633	NA	0.399715276	0.095128345	0.23617823	-0.024190239	0.079088406	-0.546625528	0.019802627	0.202450928
218	0.473248359	0.417788858	-0.336032333	0.055907632	0.620737765	0.161438346	0.075756612	0.230158886	0.081487817	0.120712075	-0.325314714	1.608257216	-0.012882626	-0.072248164	0.320342855	-0.635633274	-0.096841351	0.512883505	0.879460759	-0.548873691	0.347412177	0.238071572	0.398373354	0.176806376	0.120357497	-0.158409737	-0.037909573	0.205305393	0.309908231	0.137149838	-0.320894207	0.166700176	0.382878609	-0.155601732	-0.231805962	0.152635246	0.235230212	0.186147562	0.196635291	0.226418184	1.810286774	0.472936823	0.2051425	0.746593156	0.076683225	-0.306117635	0.798677682	0.754900577	-0.592216462
219	0.214788747	-0.008334637	0.009058844	-0.149428513	-0.160638346	0.079457921	0.173617116	-0.168300315	0.237519717	0.170923512	0.16220388	0.135928517	NA	NA	-0.014504686	-1.158680815	0.165768643	-0.306796936	-0.711718566	-0.393338928	0.190372395	-0.229035877	0.076683225	-0.030974804	-0.165582441	0.682440063	-0.018469516	-0.272727781	-0.285417971	-0.012376271	-0.183922838	NA	-0.148732054	0.449864695	0.247562956	-0.30598183	0.014494446	0.164921042	-0.202483449	0.210989995	-0.308973808	0.221942831	-0.02583076	0.205061044	-0.568807906	-0.307068786	0.102105223	-0.408419468	NA
220	0.11680478	0.640431823	0.146348896	0.288706547	-1.246184653	0.141586364	0.471502505	0.777672136	-0.165818485	0.095491981	0.150486833	0.847454991	0.262133469	-0.162401289	0.569396373	-0.117095772	0.192189376	-0.144447904	0.061941402	-0.162401289	1.446495364	-0.158292579	0.019410394	0.256578327	-0.125336491	0.104990447	-0.153267736	0.218090808	-0.394525168	0.091575943	0.224183011	-0.183682482	0.472874504	0.545516864	0.001199281	0.468940564	-0.400925428	0.143147509	-0.246156326	0.041813503	1.313562365	0.323386997	0.204327637	0.110736042	0.256810409	0.079088406	0.25727441	1.110046666	NA
221	-1.010326724	0.607262441	0	-0.2338254	NA	0.279145741	0.019508466	1.441539835	0.055907632	-0.053295297	0.309541407	0.673913391	0.275052656	-0.253860524	0.233569017	0.085076172	0.020488666	0.420682074	2.502304427	-0.920549789	-0.104250021	-0.265529268	-0.330311255	-0.815993011	-0.048560191	0.204327637	-0.676683455	0.020782539	0.071762366	0.040661982	0.146780731	NA	0.002895803	-0.014910613	-0.174591511	1.253105767	-0.09376138	3.086947718	0.089932108	0.433274809	0.909668856	1.010290963	-0.059750004	-0.131362318	0.097217451	0.352204968	0.648411287	NA	0.010049336
222	-0.004912044	0.046119936	-0.273384768	-0.456179623	2.087719683	0.087369646	0.36686287	0.26174869	-0.641314032	0.086911372	0.603113058	0.379942151	0.285103751	0.572052417	0.037681067	0.631165388	0.212527399	-0.571106555	-0.371063681	-0.40167231	0.290727431	0.084249232	0.095219267	0.329015936	NA	0.045642358	-0.049295292	0.156490797	-0.502361545	0.181154209	-0.212945726	NA	0.084433056	0.75396002	0.324977857	1.469117814	-0.260066905	-0.258770729	0.374455921	0.427357055	NA	0.09567375	0.105980324	0.559787202	-0.039676817	-0.407216641	NA	0.190537712	-0.675896827
223	0.269416264	-0.02081514	-0.723812595	0.397768901	-0.801400766	0.496706415	0.165853364	0.443017764	-0.009646377	-0.450514777	0.006379607	0.431262801	0.253556358	0.401925518	-0.209363928	0.452539515	0.503498848	-0.061981792	0.13155444	-0.460449416	0.479396874	0.056663847	0.164412136	-0.465533635	-0.443322751	0.44519851	0.231032353	0.02586266	0.008662373	-0.007528266	0.208151733	0.285780265	0.440703544	0.357674444	-0.105360516	-0.276017041	-0.354249317	0.165853364	0.392447411	0.356834931	NA	0.127161146	0.321793602	0.62882197	-0.229035877	-0.193584749	NA	-0.313478627	0.029558802
224	0.429311835	1.07442205	0.126896933	-0.636577829	NA	-0.305438794	-0.02583076	1.248582815	NA	-0.070100628	0.729575537	-1.303424883	-0.243091189	0.004489905	0.141673158	0.023130417	NA	-0.955291469	0.063819513	-0.012173801	0.336472237	0.025765208	0.007174204	-0.026960182	-0.700776208	1.411133304	-0.154784214	-0.335612606	-0.216167938	0.460836741	-0.030665414	0.194003062	-0.005917474	-0.286882392	0.242789304	-0.636955901	0.157601861	-0.216913002	-0.355532739	0.567470572	NA	-0.836555764	0.35143122	NA	0.087919298	0.394471567	1.015701583	-0.855195633	NA
225	-1.060738636	-0.176498543	-0.681416258	-0.084904507	NA	-0.125336491	-0.404815319	-0.911054465	0.213820224	NA	-0.393487131	-1.204973305	-0.193463397	0.02039069	-0.040821995	-1.357123984	-0.296790091	-0.708260818	-0.788337368	0.30151101	-0.460766424	0.131291386	-0.102697398	-0.298271274	-0.137654165	-0.129539371	-0.165228479	0.062786988	-0.348990261	-0.196745077	-0.302728031	-1.217395825	-0.559840813	-0.30069977	-0.374984401	-0.53034829	0.184652172	-1.359847191	-0.190676361	0.079550279	NA	0.026836654	-0.145488307	0.01607018	-0.269973139	0.242318531	-0.488086137	NA	-0.081426999
226	0.558872655	0.436899174	-1.11108981	0.441475546	-0.800509699	-0.335332886	0.174205376	-0.459974094	NA	NA	0.398843232	-0.769380487	NA	-0.601297527	0.204164585	0.406797553	0.663151783	-0.685575915	-0.232058169	-0.431860419	0.337614441	-0.161225648	-0.252057561	0.033531483	-0.155601732	0.746308729	0.255494568	0.056852812	-0.673148494	0.260670523	0.2786161	-0.021325787	-0.107807953	-0.371933625	0.269263487	0.438512962	0.304317926	-1.002938539	-0.158292579	0.256810409	-0.078177781	0.084708728	0.212365678	-0.159464775	-0.050767117	-0.40947313	NA	0.521528147	0.111899092
227	0.169573984	0.040949986	-0.105805059	0.625296514	0.220580269	0.317944511	0.195731244	-0.53034829	0.169911537	-0.158292579	0.478839478	0.503740584	NA	0.384922207	-0.324761081	-0.252314929	0.286606494	-0.72649716	-0.56528181	-1.109268869	-0.066139803	-0.255279421	0.008364916	-0.136278018	-0.434482057	0.309394639	-0.447225042	-0.215919706	0.140370453	0.101111501	0.143580728	0.475239896	0.328656055	0.340606536	0.563380123	0.002197584	-0.040717833	-1.048965349	0.171850257	0.080196542	-0.352113933	-0.13776893	0.133918818	0.106519843	0.331746804	-0.06134363	NA	-0.056676177	-0.453028525
228	-0.181282097	-0.022143365	-0.099820335	-0.336872317	NA	-0.529838563	-0.570929548	0.118049667	-0.456495279	0.041333863	-0.384339826	-1.04497674	0.219617342	-0.119684843	-0.185606948	-0.228784431	0.068592791	-0.056676177	0.090206268	-0.610461814	-0.537511889	-0.361400377	0.040469933	-0.401224114	-0.27483166	-0.067315707	-0.386398045	-0.256054215	-0.308973808	-0.115410852	-0.810805224	-0.010151351	-0.213936071	-0.410075721	-0.310336763	0.475177721	-0.123863987	0.843332867	-0.115972176	-0.163813885	0.432431556	0.257042436	-0.204444474	-0.913544506	-0.194799078	-0.671385689	0.548121409	-1.435484605	NA
229	-0.043325125	0.664747706	-0.096731189	-0.728359936	-0.622316	0.038643624	-0.240925721	0.235467301	-0.311565013	NA	0.655445313	1.439764035	NA	0.440446077	-0.124203603	0.679149671	-0.03853295	-0.505174952	0.257042436	-0.121376986	0.54725398	-0.136507245	-0.24692408	0.046310903	0.05230778	0.536434889	-0.311838162	0.172271221	-0.488412029	-0.243218716	-0.049295292	0.045833416	0.018821754	-0.082078111	-0.20383124	0.096945206	-0.400776119	-0.024497632	-0.187293898	-0.082512422	-0.406765954	0.528626248	0.118849134	0.379258016	0.024204689	-0.240798487	-0.204076489	NA	-0.018978967
230	0.107328578	0.239725311	0.261132737	0.256423577	NA	-0.163813885	0.540462093	0.294310059	0.153664848	-0.831030888	-0.41521246	-0.424495034	NA	-0.052662653	0.333825881	0.025667747	0.410386312	-0.298271274	-0.240162556	0.109930059	0.491398126	-0.14317777	0.065225785	-0.364131245	-0.004008021	-0.244367188	-0.064538521	-0.088612658	0.138108402	0.118849134	-0.496594042	0.610308902	0.78577194	0.535323095	0.110556991	0.940749171	-0.111937653	-0.680230955	0.022054991	0.152205933	0.449290588	0.387640523	0.286456322	0.147643842	-0.025215249	-0.592397277	0.347765371	-0.434945413	NA
231	0.199424465	-0.095190187	0.356204833	0.188717724	NA	-0.171381617	0.234518609	0.003294567	0.292445708	0.243103029	0.558929838	2.798158998	0.329303747	-0.136736524	-0.17697587	1.25424758	-0.041655675	-0.070529766	-0.402718882	-0.144447904	0.312252726	-0.117883041	-0.010050336	-0.131932671	-0.312521362	0.781570061	-0.205058084	-0.138113302	0.016365354	0.039989648	0.161438346	0.370597573	0.081948583	0.324110429	0.367278527	-0.866073016	-0.205917771	0.222663436	-0.149312403	0.046883586	1.310061055	0.258742329	0.150916885	0.031789322	-0.25902983	-0.107919342	1.677339522	0.01597177	-0.144447904
232	0.30032679	-0.293566016	-0.363124268	0.511265527	NA	0.061753396	0.271019012	0.637898706	0.130414039	NA	-0.224519497	1.61215422	0.361443556	0.934955457	-0.10280822	-1.359457707	0.332105574	-0.533753128	0.177225259	-0.273910668	0.299067017	-0.008233805	0.113328685	0.079273181	0.120889317	0.065225785	0.048123275	0.005186527	-0.029222859	0.020488666	-0.380236054	-0.155484903	0.352486183	0.502833774	0.294161039	-0.039156715	0.861073961	0.369492448	0.323097478	0.078164021	0.754665521	0.26681588	0.264515794	0.474804586	-0.00471108	-0.080884729	NA	0.268269869	-0.560891601
233	0.283372801	0.12009148	-1.497002483	1.224216511	-0.1889837	0.102556588	-0.350408902	-0.081643989	-0.277599737	0.128569101	0.902962302	-0.405715139	0.209369118	0.037681067	0.02644717	0.034014879	0.17083922	0.025570276	0.769181867	-1.096614286	0.028295869	0.151518648	-0.169958298	0.203512109	-0.054033888	0.943438864	0.105710454	0.073900808	-0.221020806	-0.019692633	0.175129086	0.647469667	-0.177692288	0.066442957	-0.212945726	-0.338273859	-0.304624793	-0.113728765	0.086636307	0.157687276	NA	-0.031181117	0.004091618	0.362766354	0.132956227	-0.286882392	-0.650470906	NA	NA
234	0.386146364	1.039640467	0.247641023	NA	-0.29732845	-0.031181117	0.654614231	-0.060918415	0.144273489	-0.063792133	0.02508278	2.595381565	NA	-0.545244551	0.247797139	0.005882663	NA	-0.051819749	-0.11945944	-0.150590359	0.266049772	0.065787741	0.124692444	0.310421559	0.133656385	0.325844534	0.024595047	0.345998149	0.077331343	0.053256366	0.14461969	-0.094200795	0.165599181	-0.376003398	-0.272071225	0.079180798	-0.459340681	-0.269842154	0.120002792	0.175129086	-0.437420279	-0.029840842	0.224582516	0.320923406	0.20538683	0.108764715	2.145685639	-0.084033996	NA
235	0.28855669	0.259436907	-1.030299648	-0.25502129	-0.249615872	0.059306106	0.221141549	0.37788834	0.050122609	2.000885229	-0.275094957	2.048647227	0.592663642	NA	-0.229538958	-0.904856354	0.245296356	-0.202973345	-0.338273859	0.040085724	0.977950112	0	-0.202361012	-0.2646168	-0.227277083	0.152721087	0.554976472	-0.39660448	-0.789658081	0.194744077	0.196963834	NA	-0.041238748	-0.038740828	0.431587592	-1.257373581	-0.12397718	0.351712652	-0.085231144	-0.120699785	1.342237975	0.357814295	0.234676787	0.310861345	0.113060792	-0.296117551	NA	1.129497072	NA
236	-0.15082289	0.544821171	0.123720927	-0.845133538	-0.084686808	-0.158409737	-0.667869373	-0.126584152	-0.013591954	0.439222205	0.267504875	-0.671777155	0.950692159	-0.262014326	-0.111266812	1.862171333	-0.424953785	-0.144679011	0.289230872	-0.785920581	-0.123185101	-0.002402885	0.133918818	-0.444413858	-0.24910259	0.6249754	-0.310609577	-0.108365025	-0.320205264	-0.224394333	0.746687947	NA	-0.323792959	-0.123071998	0.101834306	-0.912298711	-0.017349638	0.090297638	0.138108402	-0.057735051	-0.248204982	0.491459301	-0.125790006	-0.457284857	-0.329754849	0.601470392	-1.137561039	0.527033563	0.709660089
237	0.385670481	0.016365354	-0.040613683	0.816293585	-0.455548608	-0.080993159	-0.140987693	0.207826847	0.235072122	NA	-0.082838278	2.158241169	NA	0.142974169	0.064100925	0.363461861	0.637211548	-0.250900228	1.278931843	0.366377719	0.092214484	0.076683225	-0.500875293	-0.739400565	-0.480458087	0.196717437	0.291175962	-0.285284948	-0.084360349	0.287056877	0.023618866	-0.172925835	-0.136851183	-0.141102841	0.681681702	-0.441766088	-0.497744884	0.051358292	0.052687322	0.117071672	NA	-0.201993793	-0.259677876	0.519150873	-0.3741118	-0.121941671	-0.693747361	0.134093734	0.183986836
238	0.663615378	-0.308293026	-1.388296364	0.661966063	-0.758005753	-0.025728149	-0.012983928	0.17756024	0.034594645	1.290306452	-0.202728367	-0.995333939	NA	0.379121133	0.008364916	-0.30870144	0.064569771	-0.653734178	-0.132046781	0.005286004	-0.031077956	-0.287682072	0.231587798	0.119204247	0.592165951	0.515753462	-0.113056722	-0.306117635	-0.255925041	-0.038117322	-0.362118304	-0.764213629	0.722900139	0.364434759	-2.747310915	0.532508835	0.052497569	-0.392598242	0.081579987	0.330166684	NA	0.229920536	0.092123289	0.010346292	-0.576787379	0.054961558	0.469503504	-1.020263322	-0.228156093
239	0.24553107	-0.537340729	-0.122506674	0.588730664	NA	-0.170432512	-0.092115289	-0.027268427	0.081856446	0.6550818	-0.287548748	0.226737087	0.086452888	-0.007226045	0.001798382	-0.117433097	0.106789494	0.503498848	0.83173452	-0.133531393	-0.202116184	-0.179724931	0.218492753	-0.559840813	0.015676479	-0.279449388	0.047169804	-0.018469516	0.519924107	0.081764302	-0.528989594	0.925726079	-0.005816885	0.628661991	0.465179512	0.605244497	-0.133645685	-0.618410834	0.023228126	0.138543809	1.029262211	0.144273489	0.011038847	-0.468404908	-0.180084062	-0.01095984	0.071017487	-0.002102208	NA
240	0.536493371	0.539121493	-1.752731082	0.916050703	-0.496594042	-0.218778094	-0.031490667	0.037103088	NA	-0.145951055	0.212123048	2.073385742	0.240904881	0.057513906	0.003693172	-0.496758367	1.305328311	0.2059567	-0.293029679	0.087094707	0.556926461	-0.217285742	0.267504875	-0.176617854	-0.085775777	0.647417329	0.223783347	-0.253216236	-0.071281202	0.222583394	0.527918701	0.403730271	-0.241052972	0.39399963	1.007264249	-0.241562137	-0.145141386	-0.094970238	0.244826762	0.448843831	NA	0.130414039	0.024204689	-0.355818168	-0.128970381	0.937190796	NA	0.433339645	0.100478619
241	0.929443849	-0.238891908	-0.797841252	1.669874281	-0.032213322	0.841825773	0.080104244	0.542382429	-0.326700139	NA	-0.463465052	0.119026706	NA	-0.066032971	-0.350408902	-1.144446825	0.947789399	-0.03386707	0.560472564	0.192684344	-0.120361357	-0.135132674	0.011730923	-0.209733864	-0.126470664	0.811241279	0.247641023	-0.171144256	0.091758425	0.354241987	0.066630082	0.20138862	-0.191281578	0.947750638	-0.136965855	0.426443514	0.191694163	0.181487876	0.220098921	0.145916875	NA	-0.351545266	-0.304760414	-0.158292579	0.201143311	0.616698008	-0.854490331	0.827065998	NA
242	-0.411734721	-0.398390194	-0.648365038	0.282619278	NA	-0.05245186	-0.308429146	-0.012072581	-0.068492996	0.30638115	-0.783947545	-1.691733155	0.341459778	0.30136306	-0.440833252	-0.889892258	0.110556991	-1.026384655	0.04859967	-0.735011385	-0.203586052	-0.260845418	-0.198450939	-0.835863483	-0.084033996	0.110109223	-0.337432698	-0.553037473	-0.394376811	-0.400029906	-0.449416996	-0.099930839	-0.686966321	0.005385472	0.422649933	-0.648938926	-0.363843433	-0.289817685	-0.043220702	0.059306106	-0.852846559	-0.122054646	-0.277071893	-0.250514748	-0.594388409	-0.334214787	0.188303628	-0.287948775	NA
243	0.573687741	0.789456861	-0.399731576	1.017872116	NA	-0.4405225	0.183321057	-0.220397326	0.031692447	NA	0.687531442	0.505129431	-0.638280279	0.160331539	0.410386312	-0.535459905	0.24865534	-0.21319322	-0.255537619	0.027031339	0.617561194	0.125927557	0.198522936	0.181654668	NA	1.062674182	0.305128986	0.248967231	-0.119234088	0.332177312	0.481623358	0.512104805	0.055150844	0.619984915	0.528626248	0.878422703	0.257970008	-0.254247296	0.449800922	0.620415184	NA	-0.523404406	0.207176758	0.020096702	0.192271888	0.472375813	0.916770617	NA	0.09376353
244	0.170164627	-0.172212823	-0.33673227	0.338113746	-0.521212717	0.121952111	-0.118220631	-0.526785643	NA	0.149970527	0.518972349	0.024692613	-0.310200384	-0.001100605	0.08213283	-0.007729798	0.906603966	-0.159230226	-0.061875404	-0.186811622	-0.491349847	-0.251543026	-0.13375999	-0.537169599	-0.249230886	0.448524598	-0.280243143	-0.338975367	-0.111937653	0.111094048	0.090023503	-0.183562326	-0.479165471	0.500835892	-0.00080032	-0.21915153	0.456411676	-1.365315955	-0.060174723	0.076868444	NA	0.443852141	-0.072033203	NA	-0.140872559	-0.06038715	NA	0.934955457	NA
245	-0.046148656	0.833908623	0.631590875	-0.004510155	NA	0.223623436	-0.30788478	0.282016051	0.120977927	-0.551126921	0.009058844	0.007372754	0.21913553	-0.486458267	-0.400029906	-0.405265128	0.377134218	0.150572858	-0.530008443	-0.719901918	0	-0.053928342	-0.09244429	0.17302851	-0.180323554	0.403930598	-0.598018835	-0.052978925	0.208232939	0.249356958	-0.053295297	-0.15280159	-0.218653646	-0.044892769	0.704383812	-0.026343975	-0.020100672	0.366654977	-0.025728149	-0.083707749	1.20579115	0.540170811	0.087552897	-0.563523413	-0.072570693	-0.883339632	0.197456444	-0.469523744	NA
246	0.111362468	0.239174368	-0.024190239	0.262133469	NA	-0.227653707	0.489867529	-0.262534279	-0.30924625	-0.032729825	-0.017654935	-0.195406796	-0.472246142	-0.000300045	0.213254819	0.058646195	-0.066567244	0.116448813	0.076220026	0.310714772	0.176722578	0.077701508	-0.065605757	-0.235469201	0.243338259	0.12283691	0.170248976	0.466372043	0.078903598	0.10625012	-0.111602177	0.065506802	0.149195566	0.354031453	-0.048350261	1.564586979	-0.058795047	-0.48207621	-0.092883127	0.261440761	-0.587346762	0.223863292	0.138021298	0.559730067	-0.420527986	-0.147572364	NA	NA	0.009554213
247	0.271933715	0.340535399	-0.686568865	0.19309663	NA	-0.156536858	0.621812283	-0.478197104	-0.098936748	-0.351971736	0.038258712	0.483659956	0.16695408	-0.179724931	0.030723173	-1.068277089	0.006478966	-0.588066704	-0.6267978	-0.031387473	0.108495596	-0.001601281	0.036042591	-0.453185844	-0.510492346	0.650970102	-0.056147161	0.014888612	-0.363843433	-0.086102699	-0.079259681	NA	-0.032110054	0.58366708	-0.6314878	-0.811930717	-0.021734492	-0.539568093	-0.056887862	0.330813398	0.235388278	0.282619278	0.050788167	-0.055407007	0.268422798	-0.770028225	0.454509208	NA	NA
248	-0.006722546	-0.346017649	-0.156186083	-1.190727578	-0.854725376	0.132167964	-0.042177079	-0.30924625	-0.485320333	0.222343231	-0.648747593	-0.638848407	0.678946831	-1.247576442	-0.051925073	0.030723173	NA	-0.565105831	-0.660486398	-0.285018955	-0.180084062	-0.330033013	-0.131818575	-0.440211844	-0.67648674	-0.094640404	-0.124883182	-0.226649691	-0.362549307	-0.157472859	-0.111602177	NA	-0.250643225	0.190289726	0.154436353	-0.362118304	-0.109368537	-0.690550555	0.299067017	0.057608313	0.085994193	0.31320361	-0.023370986	0.001898197	-0.497415937	-0.229161624	0	-0.082186671	NA
249	0.195977883	0.669776194	-0.512827626	0.777809968	0.173533051	-0.232815171	-0.087084107	-0.269449304	-0.267618041	1.25772208	0.159138221	0.114756237	0.382810418	1.119133612	-0.018163971	-1.763172012	0.22154227	-0.06592615	-0.464260155	-0.503188197	0.17479329	-0.021938908	0.491459301	0.463230745	0.295352579	0.857262335	0.13208034	0.025375306	0.019214219	-0.058795047	-0.003104815	0.132343187	0.384241472	0.869869759	0.264362267	0.050217716	-0.058052931	-0.307204739	0.248343352	0.519448341	1.662637389	0.40978908	0.253012985	0.759075361	0.387165351	0.313130497	0.963784818	-0.085448962	-0.254505228
250	0.016857117	0.621221441	0.727645221	-0.152219213	NA	-0.205549243	0.39102806	0.003593536	-0.119572135	0.398574757	0.2908022	-0.051714436	0.659021466	0.023716527	-0.005515181	0.557441998	-0.044683608	0.989801383	0.868108383	-0.137424676	0.374662199	-0.203708639	-0.118558336	0.015085637	0.348259634	-0.003907625	-0.072355662	0.102105223	0.473372947	0.360816356	0.178815417	0.24247548	0.510485566	0.363253259	0.343164082	0.413036374	-1.048109306	2.252186135	0.127073083	-0.071818288	0.424548523	0.475053358	0.20057069	-0.492494667	-0.15082289	-0.050030934	0.123279016	-0.30069977	NA
251	-0.017858518	0.584057498	0.43502391	NA	NA	-0.686568865	0.359141899	-0.333516609	-0.13857265	NA	0.412904037	3.572592798	NA	-0.911800827	0.104540179	-1.755620423	NA	-0.125223145	-0.28621648	-0.316493154	0.729334451	-0.175544573	-0.229664768	-0.348706774	NA	0.656379456	-0.367013922	-0.121602822	-0.193584749	0.174457382	-0.150590359	0.418578747	-0.528480559	-0.242198958	0.683904599	-0.481590498	0.140544245	-0.705219762	-0.016027761	0.204490663	0.538187841	0.568886963	0.027420596	0.154436353	-0.233572747	0.083421608	2.043088712	0.598341873	0.083329608
252	-0.000300045	-0.042803122	0.241454871	0.2056311	NA	-0.72815279	0.189876281	0.271933715	-0.362549307	-0.345593711	-0.06817178	0.105980324	0.180069022	-0.498238508	-0.118220631	-0.951658876	0.280959527	0.320415442	0.121066528	-0.424800844	-0.060068526	-0.215051381	-0.255537619	-0.485645325	-0.029840842	0.448779993	-0.379212737	-0.354676941	0.207501855	0.082869478	-0.250129416	NA	-0.010151351	-0.103140759	-0.182721637	0.488457308	0.520577915	0.747351235	-0.052135754	0.172187042	-0.678061543	-0.42617815	0.14401376	-0.246028424	-0.098936748	-0.535630743	0.475115541	-0.747181069	NA
253	-0.066781034	0.992102965	0.55583723	-0.948297528	-0.347007539	-0.181042375	0.189545402	1.016715085	0.076775839	0.269721747	0.171513358	-0.869645724	-0.012072581	0.824657783	0.161863715	-0.303269596	NA	0.187972228	1.241644241	-0.283291724	-0.174234347	-0.076341233	0.049837235	-0.040301297	-0.074184898	0.53964629	-0.24551698	0.025765208	-0.476424197	0.509584854	-0.03853295	-0.893795654	-0.265659688	-0.656236827	0.075756612	0.653886467	0.227294922	2.418526434	0.022837234	0.273456365	-0.254376254	0.207420591	-0.089049817	NA	0.434376452	-0.0010005	-0.494132401	-0.470003629	NA
254	-0.608622225	0.482364419	0.414226614	-0.672560547	NA	-0.4522423	0.259282598	0.613183636	-0.087520598	NA	0.22154227	2.431998016	0.116626812	-0.166172655	0.188883315	-0.110596421	-0.527971783	0.317798971	-0.664171072	-0.416121688	0.345785873	-0.293968457	-0.240671268	-0.260585847	0.181487876	0.25332352	-0.516340804	-0.176856517	0.711085326	-0.251028755	-0.436800988	0.668290805	-0.26097523	0.059777204	-0.354391838	1.797244399	0.06165938	0.199178674	0.249590721	0.034014879	0.298028365	0.492070847	0.030723173	NA	-0.234457311	0.668752024	NA	-0.217410019	NA
255	0.314591738	0.075478461	-0.928616382	0.098305689	-0.158058305	0.531686514	0.129887261	-0.29732845	-0.622875128	-0.661454734	0.171429116	2.652107519	0.539587992	-0.347290544	-0.395712817	-0.44347855	0.504405056	1.170250547	-0.678849876	-0.769164667	0.303506208	-0.163225061	-0.030768534	-0.122958907	-0.252057561	0.094400675	-0.334214787	-0.404365713	0.755135578	0.146953413	0.086728004	0.131642109	0.281714301	0.739171619	0.10490041	0.601086715	0.153836345	-0.064965279	0.428790933	0.198194906	0.771542378	0.233410664	0.09558287	-0.752472647	-0.606235809	NA	NA	-0.697155202	NA
256	0.718229961	-0.110596421	-0.833329211	1.212149286	-0.384192973	-0.215299397	0.28840681	-0.031387473	0.094127663	-0.355675444	0.315832116	0.876218456	NA	-0.278524135	0.071110627	0.36769401	1.502542887	0.012916225	-0.731888009	-0.235595759	0.087552897	-0.272465107	-0.051293294	-0.522223669	0.081948583	-0.019386714	-0.175187068	-0.356103679	-0.054456186	0.057136191	-0.165936528	0.51108559	0.131817425	-0.127265351	1.104494952	1.03733954	0.067565186	-0.445037883	-0.344746373	-0.153617489	NA	-0.27733578	0.056758334	0.027323296	-0.194070304	-0.531538665	0.975238655	-0.303811454	NA
257	0.222022924	0.01607018	-0.853315933	0.857389624	1.225567942	-0.226775138	-0.159816701	-0.447068658	0.457614702	NA	0.364087404	0.812662049	0.028393075	-0.214803427	-0.142255048	-0.363268059	0.551007413	-0.067529657	-0.327671081	-0.149776925	-0.353109878	-0.213812224	0.188137942	-0.504181081	-0.05087233	0.124692444	-0.114849842	-0.499720844	-0.536143432	0.209855657	-0.002302649	NA	-0.384927457	0.290876963	-0.238257189	0.363322798	-2.018911042	-0.536998498	-0.088066479	0.031401763	NA	-0.48240015	-0.19334206	-0.03573081	-0.180922536	-0.626984978	-0.175187068	-0.800287056	NA
258	-0.112273242	-0.072033203	0.317362227	0.550373207	-0.45082865	-0.252186237	-0.63714499	-0.185968198	0.070272053	-0.416880011	0.171681822	-0.335193055	-0.541456667	-0.34418188	-0.038740828	-0.827593277	0.184735308	0.493414934	0.651543631	-0.943918899	-0.454287773	-0.220023424	-0.073754189	-0.345735004	-0.161695739	-0.657201054	-0.68995229	-0.207270202	0.245296356	0.144273489	-0.71233	-1.090346544	-0.550606494	0.268957863	-0.635255702	0.513601767	-0.132275039	2.245125457	0.29334103	0.082961521	NA	-0.305167387	-0.13250335	0.018625464	-0.246540129	NA	0.933383809	-1.026105598	NA
259	0.120534802	0.14461969	0.28855669	0.326638328	-0.627172192	-0.453343188	-0.52087596	-0.101036544	0.208638865	-0.278392026	-0.58554917	1.485755007	-0.029428811	-0.760783829	-0.006420568	-0.626610657	0.566336014	0.487106537	0.646946162	-0.335332886	0.040565962	0.028198654	-0.01959065	-0.756939314	-0.080017708	-0.279581636	0.078718755	0.176890167	-0.085884739	-0.018775155	-0.324484379	NA	-0.047196435	0.001299156	0.249746533	-1.470981169	-0.116646182	1.678572107	-0.107139876	-0.207024169	NA	-0.95998142	0.100569055	0	-0.014504686	NA	-0.262664309	0.358652986	NA
260	0.410916887	-0.253473901	-0.769812265	0.185981518	NA	0.071389996	0.326494048	-0.093871216	0.196306641	-0.583754804	-0.00040008	0.390148404	NA	-0.32628431	-0.170669704	-0.633369977	0.322228416	-0.128970381	-0.181881654	-0.719901918	-0.16110816	-0.13375999	-0.047301273	0	-0.188621359	-0.390822831	-0.094750337	-0.124543335	0.145916875	0.048123275	-0.04103035	0.467249841	0.081856446	0.156405279	0.423239536	0.224342832	-0.107139876	-0.392154094	-0.28941691	-0.197719499	NA	-0.083055575	0.125663018	-0.013794711	0.092852617	-0.543176654	0.293713845	-0.079584479	NA
261	-0.52915933	0.014494446	0.183820433	-0.070422464	-0.384046141	0.045546815	0.477227474	0.545458908	-0.152918106	-0.168892136	0.064757247	0.182154876	-0.685774426	0.674677664	0.198112882	-1.20330636	NA	0.248499359	0.406664389	-0.069242903	0.752641752	-0.191523768	-0.041759934	0.097035963	0.122483084	-0.316904931	0.305571105	-0.069457265	0.188469287	0.277177088	-0.029016949	0.786182047	0.388522387	-0.074615793	0.359979478	0.536142432	-0.187776407	1.430813513	-0.007326775	0.195977883	0.501562856	0.333969106	0.21179945	-0.013896105	0.017839918	-1.109875481	NA	-0.176737179	-0.788777412
262	0.376585409	-0.086538761	-1.168283962	0.384922207	-0.547316732	-0.005012542	-0.139721943	-0.685377443	-0.045625178	-0.548008415	0.733280938	-0.766793721	0.102285794	-0.169839779	0.317944511	0.047551302	0.289455499	-0.579104465	1.323940119	0.418841905	0.233173087	0.538012684	-0.083164241	0.000299955	0.019116117	0.675644905	-0.331982331	0.13076507	-0.334354481	-0.190313407	-0.087084107	NA	-0.124769887	-0.486458267	0.02166364	0	0.072134598	-0.238511028	0.078348966	0.016660441	NA	-0.021427947	0.102556588	0.186064543	0.359351359	-0.762068626	-0.010454458	-0.224519497	NA
263	-0.06049338	-0.257864404	-0.578034373	0.006776984	NA	-0.633369977	-0.169958298	-0.425106748	-0.045729852	NA	-0.295445463	-0.583754804	0.345077958	-0.958415658	0.409324318	-2.752002089	-0.040093094	0.274748797	0.159649818	-0.601479992	0.317435031	-0.189708775	0.049837235	0	0.142107017	-0.071388596	-0.123185101	0.133043774	0.151862349	-0.02706292	-0.753321904	0.252236226	-0.016739324	NA	0.039124555	0.299585939	-0.049085208	-0.214803427	-0.09530018	-0.085231144	NA	-0.584831037	-0.099820335	-0.022756987	-0.116983355	NA	-0.460607908	NA	NA
264	0.109571636	-1.045830103	NA	1.388042832	NA	0.31320361	-0.169602784	-0.027782381	NA	-0.003907625	0.145311731	-0.162401289	0.518198378	-0.683592968	-0.029119899	-1.425451076	2.097306017	0.145916875	-0.077313103	-0.232436598	0.090023503	-0.281832548	-0.023575737	-0.120248573	0	-0.316355933	0.226418184	-0.360826406	-0.562996496	0.21398171	-0.159699379	0.150744887	-0.091348039	0.301067092	0.787820794	-1.244100595	-0.038636884	0.131992709	-0.145603974	0.090571698	NA	NA	-0.130222587	-0.181162229	-0.100483539	NA	-0.603489309	0.317580623	-1.338266392
265	0.276949686	-0.192129498	-0.015418253	-0.223143551	NA	-0.080342753	0.054582878	-0.643595402	-0.526277728	NA	-1.027222293	-0.933945667	-0.428477882	1.483398386	0.089932108	-0.189346172	-0.47868117	0.379189577	0.291325427	-0.245005798	-0.490859611	-0.019386714	0.114845392	-0.433864583	-0.428477882	-1.398771883	-0.150706617	0.057419491	-0.158058305	0.068779515	-0.082621029	-0.165582441	0.063068691	-0.097061713	-0.399731576	-0.664171072	-0.111602177	0	0.060342229	0.308513582	NA	-0.036871475	-0.056782014	-0.153267736	-0.521886571	-1.625567294	0.247875188	NA	NA
266	0.142280507	-0.496594042	-2.275943162	0.368109322	NA	-0.112497031	0.097308182	0.12751332	0.019802627	NA	-0.039676817	-1.203972804	-0.211462047	NA	0.034594645	-0.665532014	-0.049715592	-0.911054465	-0.414001439	0.227693186	0.418447142	0.033047854	-0.302592685	-0.265529268	NA	-0.081643989	0.13400628	0.025277807	-0.509493179	0.119647962	-0.22777928	-0.034902052	0.008364916	0.258356243	-0.207885549	-0.239272933	-0.247564326	-0.772190388	0.149712273	0.178480857	NA	-0.551994901	0.075756612	-0.258382203	0.046979001	0.32128608	-0.894040123	0.426312941	0.244826762
267	-0.908074577	0.073715038	-0.075046874	-0.752684893	NA	-0.046043939	-0.616556578	-0.28595024	NA	NA	0.248499359	NA	0.004788517	-0.057205474	0.03758476	-0.277863764	-0.798285499	0.130414039	1.5427424	-0.562645372	-0.549739717	-0.084795652	-0.31320503	-0.514833645	NA	-0.144101344	-0.400626831	-0.043951888	-0.027782381	0.015184135	-0.164992575	NA	-0.432014443	-0.205426431	-0.770244231	-0.239399974	-0.059537713	0.432755968	-0.068600091	-0.035005609	-0.417638909	0.230635417	-0.2424538	NA	-0.074939087	-0.701582659	-0.151288114	-0.764213629	NA
268	-0.273910668	-0.751836177	-0.459024125	0.209936724	NA	-0.651237777	-0.070315174	0.449545787	NA	NA	-0.272202502	0.900730294	NA	-0.629046255	-0.161225648	-1.491654877	0.589784668	0.058834786	-0.363699559	-0.226398844	-0.150590359	0.11439954	-0.023985363	-0.505174952	NA	-1.215033752	0.099664323	-0.22777928	0.789366038	0.316123746	-0.107585211	NA	-0.522729528	0.444365257	0.768579276	-0.730226189	-0.743178114	-0.777616337	-0.344746373	-0.098936748	NA	-0.218653646	-0.031490667	-0.363699559	-0.460132509	NA	-0.319379159	0.130414039	NA
269	0.100930719	0.509584854	0.238307988	-0.304218041	0.084341148	0.588841664	0.138195499	NA	NA	0.41012092	0.071762366	0.031692447	NA	NA	-0.036871475	-0.803185286	-0.277599737	0.040565962	0.389877585	-0.746337009	-0.182841692	-0.32628431	-0.172806964	0.071762366	0.244043615	-0.149312403	-0.091786396	-0.054984308	-0.134446097	0.245765729	-0.265398864	NA	-0.045625178	0.15083089	-0.092663685	1.737989426	0.285103751	1.347085648	0.304317926	0.034884402	1.362308998	0.4272266	-0.112273242	0.538187841	-0.385221402	-0.193220738	NA	-0.588246771	0.066442957
270	-0.027473977	-0.29021862	0.635941707	0.692046575	-0.562645372	-0.598746505	-0.009242581	-0.249615872	0.01232375	NA	-0.782415648	1.767637527	NA	0.276343028	0.002696362	-1.088265997	1.445294134	-0.19735398	-0.158995731	-0.222393832	0.194167779	-0.080017708	-0.114737677	-0.478035801	-0.133302847	-0.40977438	-0.110819835	-0.506003933	-0.532560116	-0.067315707	-0.555997342	NA	-0.241562137	-0.394080163	0.137498513	-0.632616681	-0.273121921	0.038354954	0.295427003	-0.153384307	NA	0.053730322	-0.192614346	0.139761942	-0.615260642	NA	0.272923701	0.194826378	NA
271	-0.135132674	0.417920549	-0.690750056	0.450693381	-0.432014443	0.168307145	0.073900808	-0.749717532	0.069992372	NA	-0.179485582	0.316123746	-0.66533748	-0.565986035	-0.025933382	-0.794515675	-0.056252942	0.355924663	1.073226102	-0.31814128	0.11867153	-0.216913002	0.120712075	0.14496577	-0.03397052	0.054204054	-0.197963253	-0.075585987	-0.023678127	0.033434776	-0.166763218	0.015184135	0.559501496	0.30446544	0.243181445	-0.057205474	-0.309927681	1.471140897	-0.005113049	0.096582098	0.048027969	0.476420497	0.192519382	-0.045311223	-0.321997503	-0.756299996	-0.053611769	-0.311701578	NA
272	0.142453968	-0.525600909	-0.803631914	0.430482871	-0.172569265	-0.269580237	-0.24538916	-0.089049817	-0.291556234	0.258742329	-0.231427771	4.268489728	NA	-0.217658621	-0.694147681	0.224422733	-0.39988073	-0.679836167	-0.567395975	-0.907083251	-0.187535124	-0.408569923	-0.117095772	NA	-0.272071225	1.551384981	-0.210227326	-0.427404016	-0.600932697	0.181237636	-0.428170946	NA	0.026544555	-0.14363945	0.138456743	-0.243218716	-0.221769496	-1.109268869	0.260285182	-0.058158914	NA	NA	-0.386839644	-0.129197938	-0.282893556	-0.684782264	1.631786316	NA	NA
273	-0.727738625	-0.404365713	-0.465374361	-0.984301942	NA	-0.379505006	0.334470234	-0.183562326	0	0.408659999	-0.511826124	-0.323378337	0.009653257	-0.013186562	0.001099395	-0.876349125	-0.645119212	-0.103806169	-0.407667532	0.257119767	1.224422281	0.268499253	-0.184163252	-0.726083681	-0.123750807	-0.267226064	-0.068600091	-0.86441011	-0.249359198	-0.015113638	-0.260066905	0.337186267	-0.203218383	-0.284753033	-0.63714499	-0.549393217	-0.820753305	0.21438531	-0.01959065	-0.075478141	0.567980704	0.198686911	-0.397496938	-0.0438474	0.186064543	-0.671777155	-0.334075112	NA	-0.505174952
274	-0.502196297	0.06024808	0.906119177	-0.50766396	NA	0.171344866	0.140370453	-0.191402666	0.04018179	-0.322963887	0.308293196	-1.359847191	-0.454917992	-0.322273517	-0.111378588	0.493964267	NA	0.191281298	-0.241052972	-0.119797563	0.652897939	-0.113056722	-0.217534313	-0.051503843	0.097217451	0.250369538	-0.347998408	-0.072570693	0.100116791	0.051833149	0.152463543	-0.419310515	-0.146414018	NA	-0.112608944	0.201552125	-0.242071561	-0.518857795	0.431717479	-0.083707749	NA	-0.437575162	0.061283228	0.506938077	-0.405715139	-0.395415772	-0.245644817	-0.626049437	NA
275	-0.286749174	-0.383018919	-1.452434164	-0.712941808	-0.574830954	-0.257346873	-0.689553645	0.244200294	0.027906953	-0.220023424	-1.944910649	NA	0.050407903	-0.001400981	-0.114513387	-1.163791015	NA	0.098486947	-0.23483665	-0.528989594	-0.426025022	-0.220023424	-0.237496058	-0.586627337	-0.374548005	-0.704612659	-0.211462047	0	-0.214555534	-0.228156093	-0.813959801	NA	-0.262274269	-0.475297618	-0.489227224	0.825096072	0.017545179	1.443973473	0.138891999	0.035463664	-0.588787165	-0.316355933	-0.291690094	-0.5642264	0.156405279	NA	-0.13090627	-0.352967539	NA
276	0.045642358	-0.105360516	-0.339677368	-0.295848662	NA	-0.335332886	-0.224269185	-0.317042228	-0.146761381	-0.874429278	0.562126918	2.149818455	-0.181162229	-1.014454981	-0.104694071	0.108854405	-0.01572296	-0.087411457	-0.177811741	-0.565809932	-0.598564538	-0.214679473	-0.110931561	0.005385472	-0.400477567	0.650396243	-0.542660347	-0.361687486	0.087552897	0.058929068	-0.256441837	-0.257088207	-0.04950542	-0.434790937	-0.195771605	-0.049190244	-0.15665381	-0.466968241	0.197948813	0.111362468	0.138108402	-0.066781034	-0.228281729	NA	-0.29289564	-0.098715973	-0.280243143	NA	NA
277	0.130940539	0.463293668	-0.301916232	0.129448067	-0.331424995	-0.21319322	0.286981827	0.430222759	0.340606536	NA	0.540403843	-0.588066704	-0.331703625	-0.565105831	-0.117433097	-0.173282532	-0.076233306	-1.026943002	-0.495937011	0.083697559	0.107957142	0.22777282	-0.013591954	0.015184135	-0.476585241	0.413565544	0.007472015	0.239646623	-0.642834367	0.439608853	0.095128345	NA	0.184818437	0.02644717	0.550603874	-0.277995803	-2.981829368	-0.064751877	0.264669298	0.353118628	0.247875188	0.409125069	0.148937113	0.46115207	-0.083816486	0.25200308	-1.21402314	-0.649896139	0.353610253
278	0.615131584	-0.233446444	0.391433795	0.855861091	0.53467886	0.400184524	0.066723632	NA	0.10399959	-0.101147182	0.657675431	-0.790980541	NA	-0.148848097	-0.413094135	0.419499497	0.900974028	-0.326977455	-0.392154094	-0.227026079	-0.033143219	-0.041759934	0.049266241	-0.238511028	-0.161695739	0.105620482	0.126632651	-0.220896079	0.115112807	0.121686518	0.500169044	0.820000072	0.072041553	0.667931931	0.264976235	0.514737961	-0.227402608	-0.015316704	-0.168537002	0.177476505	NA	0.308146246	0.066630082	0.619285332	0.004191205	-0.21915153	-0.497580397	0.225381046	-0.472406514
279	0.088834714	0.071762366	-0.592578126	0.1857324	NA	-0.552689828	-0.5730557	0.216642465	-0.282893556	NA	0.191033497	0.408261195	0.027517886	-0.213440776	-0.143408583	-0.479165471	0.052687322	-0.159464775	0.561784862	0.063819513	0.334684926	0.052782185	-0.20567207	0.085627086	-0.123411345	0.697587309	0.148678592	-0.188742125	-0.502196297	-0.079584479	0.013014937	-0.215671536	-0.542316291	-0.323792959	-0.076341233	0.360886065	-0.2714151	0.738407312	0.11520193	0.0835136	0.675390459	-0.027885203	-0.060068526	-0.035109177	-0.287415441	0.313569093	NA	-1.290984181	0.53362376
280	-0.140066989	0.297062934	0.374799694	NA	NA	0.30733763	0.076034686	0.508021696	-0.028811082	0.340250803	0.186147562	-0.721546655	-0.434173272	-0.362980497	-0.086865933	-0.130222587	NA	0.312837992	0.246156706	-0.118783536	0.413697793	-0.267748735	-0.097392346	0.017446914	-0.3588201	0.254952248	-0.292359662	-0.067636649	-0.167235919	0.446095084	-0.133645685	-0.717849793	0.341033248	-1.223835433	0.23791393	-0.042490052	-0.341082849	2.042141982	0.509344527	0.274064776	NA	0.564802315	0.102737077	-0.159934038	-0.270497248	NA	-0.126697653	0.681529961	NA
281	0.335614726	-2.430418465	0.25176988	-0.108365025	1.052777752	-1.133825044	0.329807218	0.316269529	-0.14363945	-0.549393217	-0.724844267	-0.33086797	0.050978245	0.067565186	0.106340036	0.554574531	0.325266833	-0.212203611	-0.602210186	0.044303926	0.230714817	-0.331146444	0.016660441	0.06400713	0.133131313	-0.174829691	0.17412136	-0.062194604	-0.507165663	-0.217658621	-0.057735051	1.095273387	-0.052768066	-0.297867098	-0.224269185	-0.241689469	-3.835061964	0.01607018	-0.100262422	-0.037079008	NA	-0.163578314	0.167546271	0.433339645	-0.2007707	-0.252443637	-0.073108472	-0.266181541	NA
282	0.011038847	0.056474847	0.027031339	-0.575186383	NA	0.554057512	-0.196136546	-0.238764932	-0.338414121	-0.912049738	-0.330311255	0.181904803	0.202450928	-0.087957279	-0.148036079	-0.166408838	NA	-0.875148789	-0.322963887	-0.092224944	-0.276148837	-0.244494877	-0.371933625	-0.662617976	-0.092553982	-0.127719742	-0.712941808	-0.373966441	-0.157472859	-0.139836945	-0.099820335	0.162288903	-0.395118816	-0.237115709	0.017839918	0.295650242	-0.327948666	-0.628483667	-0.336032333	-0.008939842	0.098758772	0.05770271	-0.177811741	-0.151520808	-0.244111858	-0.340660997	-0.059962341	-1.505979204	-0.441299561
283	0.215192022	0.055907632	1.113927739	0.031692447	NA	1.363435067	1.07558246	-0.366004039	-0.155251285	NA	0.035463664	0.770524802	-0.143062383	0.867478567	-0.245900538	0.299956433	0.537720687	-0.11518641	-0.351687402	0.404731506	0.356484926	0.007670506	0.246313053	NA	-0.298001805	-0.234583741	0.375280777	-0.326838788	-0.32573014	0.348047837	0.306896291	0.352556475	0.542324291	0.448652303	0.231825752	1.224657396	0.655185674	-0.163578314	0.011038847	0.434376452	NA	NA	0.266892458	0.931730916	-0.42007126	0.200407024	NA	0.46033201	NA
284	-0.088940509	0.119914097	-0.113168698	-1.15169666	-0.176259965	-0.321859524	-0.233067633	-0.785701162	0.256191405	NA	0.438448461	0.314372688	-0.137424676	-0.060280931	0.029850022	0.12830526	NA	0.085351667	-0.257217532	-0.131134268	-0.056358734	-0.348281695	0.184402723	-0.27010414	0.041045969	0.141412753	-0.296790091	0.088010877	0.223303539	-0.192129498	0.063819513	-0.267095439	0.104179819	0.048980622	-0.582142623	0.426639343	-0.287682072	0.723142781	-0.052030408	0.076961041	NA	0.452793888	0.14418692	-0.131932671	-0.516005684	NA	-2.488914671	-0.109591677	NA
285	-0.343758719	-0.453343188	-0.069028586	-0.250001005	-0.192856859	-0.137654165	-0.695349604	-0.229413164	0.193755934	-0.463783017	-0.957373177	-0.052768066	0.433145124	-0.866073016	-0.391118514	-0.462511763	NA	-0.154900961	0.000699755	-0.002102208	-0.698159722	-0.160755779	-0.136048844	-0.863461118	-0.043742923	-0.434636485	-0.392894451	-0.147108865	-0.24794867	-0.322135501	-0.294236841	NA	-0.600203435	-0.901648455	-0.860619535	-0.244367188	-0.057735051	1.152532131	-0.001601281	-0.172688108	0.232222215	-0.142255048	-0.270235159	-1.009228728	-0.236228791	-0.746547957	-0.107473858	-0.673344553	NA
286	0.083789526	NA	0.379942151	0.272314595	0.204490663	-0.025112701	0.766165273	0.350656872	-0.488086137	0.557900031	-0.346159002	1.670213111	NA	-0.031593872	-0.123071998	-0.663588378	0.36741704	-0.317179543	-0.408720401	0.360607202	0.73169459	-0.342067863	0.060059756	-0.011566636	-0.434173272	-1.010601411	0.061001022	-0.350834887	0.075200233	0.029073247	-0.016434306	0.400452566	0.086177696	0.204898111	0.023814178	0.10625012	-0.221894332	-0.560015868	0.153064376	-0.210103938	NA	NA	0.14617611	-0.786140047	-0.149428513	-0.79142175	NA	-0.452713961	NA
287	0.017741681	0.300400845	-0.009141658	-0.721546655	-0.173520401	-0.128742876	0.45139404	0.305055281	-0.186450067	-0.270497248	-0.06166266	-0.558441478	-0.066674133	NA	-0.240925721	-0.358390701	-1.650259907	0.09558287	0.118937924	0.204735152	0.367624775	0.032176732	0.023228126	0.072599692	0.48205571	0.441539852	-0.310882466	0.353188875	-0.135018212	0.245843937	-0.125449851	1.486931238	0.154864711	0.158711691	0.30417039	0.681378197	-2.468639677	-0.100925919	-0.348848508	0.14660802	1.653435659	0.428009073	0.251303317	-0.045206593	-0.03759803	-0.561768103	0.512164727	-0.276148837	-0.672756491
288	0.171176346	-0.086429728	-0.06325934	0.113775014	NA	-0.293834292	0.392920081	0.203593692	0.029073247	-0.011465478	0.125751205	0.917210309	-0.024702613	-0.250643225	-0.236608802	0.20057069	0.012718772	-0.766793721	-0.496101228	-0.014707629	-0.036560255	-0.300834859	0.27307592	-0.131932671	0.28570512	0.070551656	-0.038117322	-0.068600091	-0.325868654	0.191363885	-0.142716302	-0.046986791	0.468126869	0.333825881	0.145916875	-0.659905847	-0.077529203	-0.852142912	0.00548493	0.092305671	1.043170048	0.689691216	0.032563991	-0.125223145	0.084800602	-0.147108865	NA	-0.290619716	NA
289	-0.604587004	-0.035419945	0.05600219	-0.391414285	-0.73417753	0.153579088	-0.512493681	0.507901352	0.225460864	0.232618522	-0.203218383	-0.536998498	0.250525228	-0.887946259	-0.011971372	0.191776716	-0.555474375	-0.338835026	-0.000700245	-0.244622583	-0.125790006	-0.23597553	-0.073431278	-0.984034384	-0.217037233	-0.13090627	-0.113168698	-0.338835026	-0.781322871	0.046310903	0.038354954	NA	-0.217782945	-0.23483665	0.023814178	0.571995979	-0.279449388	0.440832252	-0.201504376	-0.184403723	NA	0.513781252	-0.338414121	-0.192735595	-0.283690051	0.369285101	NA	-0.070851741	-0.287948775
290	0.141499562	-0.426331301	-0.326561511	-0.125903417	NA	-0.359679453	0.305792092	-0.105360516	-0.094640404	0.697189001	-0.283158984	1.055913534	0.329879121	0.076497971	-0.161813296	0.465367901	-0.002904213	0.129711607	0.947556814	0.189793572	0.495671376	-0.17578298	0.146694379	0.225620481	0.177392764	-0.877070019	0.1670387	-0.051609134	-0.3878708	-0.09783336	-0.069350078	0.204490663	0.111362468	-0.26097523	0.050027494	0.336615084	0.274748797	0.802674005	-0.090034123	-0.171144256	1.317319347	0.10020726	0.201960772	-0.329754849	-0.008233805	-0.185847767	0.183570776	0.209531324	-0.59747343
291	0.452285079	0.497922738	0.182571526	0.249201086	NA	-0.164992575	0.341175445	-0.096951526	-0.58554917	-0.437420279	0.27732866	2.789243016	0.044973366	-0.089487167	-0.347007539	-0.109703265	0.217527813	-0.903621329	-0.051293294	-0.021019367	0.223943231	-0.179724931	0.124692444	-0.097061713	NA	0.62722103	-0.209487225	0.315175637	-0.761854379	0.228568808	0.256810409	-0.35939292	0.182404887	-0.128401715	0.332822728	-0.010454458	-0.159934038	-0.702793558	-0.083055575	0.32570014	NA	-0.118333187	0.013607003	0.854330218	-0.238257189	-0.041342964	0.741603956	0.215192022	-0.238130294
292	0.653210211	-0.001100605	0.250447386	-0.08872193	0	-0.069135739	0.312911126	-0.276676193	-0.254505228	0.08204071	0.089840704	0.482302685	-0.11945944	-0.612489278	-0.255537619	-0.088284915	0.005385472	-0.858729621	-0.054878662	0.392042088	-0.126016841	-0.130336502	0.0009995	-0.055829885	-0.347007539	-0.077961541	0.167969051	-0.208254939	-0.301240237	-0.056358734	0.002297359	-0.412187654	-0.403916308	0.356554937	0.002796087	-0.607152987	-0.293431904	-1.574070769	-0.537340729	-0.076773059	NA	-0.334494194	-0.242963679	-1.237874356	-0.023575737	-1.256319285	0.020096702	-0.487109097	NA
293	0.305571105	-0.317866404	-0.925079238	0.723773374	NA	0.366239062	-0.036663984	0.383832808	-0.510658971	2.686526894	-0.259159406	0.108046904	NA	0.985070247	-0.180922536	-0.500215445	0.935308738	-0.218031639	-0.279449388	0.139848895	-0.09530018	-0.160520927	-0.14317777	0.064850972	-0.361256853	-0.348140041	0.383423977	-0.253602759	0.169067441	0.282468505	0.633609468	-0.012376271	-0.158058305	NA	-0.08077631	1.304921603	0.134618302	-0.093871216	-0.151171788	0.158028864	NA	-0.448946887	-0.12284583	-0.327116142	-0.688756832	-0.399284249	-0.654311157	0.080011938	NA
294	0.381240719	0.238465567	0.272847583	1.210004577	-0.173282532	0.282393111	0.510485566	0.051548262	-0.189467025	0.44327457	0.287281992	1.263109261	NA	0.907330711	-0.340379861	-0.980829253	1.877355957	-0.205549243	-0.349557476	NA	0.122129133	-0.302592685	0.138979027	0.005783245	-0.28621648	0.339538958	-0.557567886	-0.063365876	-0.466808738	0.040373894	-0.415515444	0.927468032	0.212608249	0.635782863	0.155549701	-0.135705182	-0.931150595	-0.769812265	-0.192856859	0.143580728	NA	-0.59511344	0.185317066	0.098396322	-0.2953111	-0.379943571	0.181904803	-0.496101228	NA
295	-0.764643182	-0.08077631	-0.258511695	NA	NA	0.493720156	0.250914348	0.395818731	0.338897864	-0.44036716	-0.032316601	-1.294262276	-0.13834295	-0.527124397	-0.039052727	-0.887217484	NA	-0.889648801	-0.202483449	0.087552897	-0.273910668	0.510365518	0.300400845	0.065132095	0.102285794	-0.504015532	0.054298773	-0.210227326	-0.136851183	0.392312322	-0.015621381	0.389267973	0.120357497	0.578577726	-0.202483449	-0.545589616	-1.374761125	0.813416013	0.057419491	-0.005314095	0.628341957	0.215675736	0.043059489	-0.026549335	0.351149708	-0.162989628	-0.161695739	0.511865083	0.034594645
296	0.074086543	-0.168300315	-0.081861026	-1.001576326	NA	-0.416576613	-0.0965109	-0.288348961	NA	0.054677561	0.06831264	4.398058682	-0.617854197	-0.326977455	-0.117995558	-0.315121788	-0.319654452	-0.567043304	-0.591312875	0.304760404	0.228330078	-0.244494877	0.436446846	NA	NA	-0.073216062	-0.114289146	-0.251928903	-0.832409248	0.297434364	-0.117208201	0.332679338	0.005783245	-0.038844784	0.610037274	-0.571992059	0.452475912	-0.525093596	-0.235342659	0.029850022	NA	-0.591312875	-0.075154674	-0.351261054	0.196717437	-0.108030744	0.817398143	0.649926478	0.207501855
297	-0.362693016	0.198604927	-0.737517128	0.439930945	-0.099820335	0.011434378	0.038258712	0.38811547	-0.016637641	-0.231553819	-0.26683424	NA	-0.786798737	-0.458549479	-0.130678324	0.066162202	0.05694728	-0.560541216	-0.830571856	-0.674325426	0.360049245	0.053066721	-0.017756722	-0.140527235	0.31429966	-0.136965855	-0.217907285	-0.308020843	-0.164756726	0.206770237	-0.251157298	0.305792092	0.221942831	0.394673757	0.570244813	0.093308177	0.506576609	-0.603855073	-0.074508052	0.015479571	1.085628361	0.117783036	0.240354588	0.8819891	-0.399135184	NA	NA	-0.998857456	-0.276148837
298	0.197292268	-0.17411532	1.062259459	0.822375579	-0.452085129	-0.227277083	0.895761441	-0.097061713	-0.107251191	0.03854741	-0.251543026	0.474617967	0.025277807	-0.141794006	-0.132046781	-0.451142622	0.247484883	0.391366184	0.061471322	0.285629968	-0.042385716	0.268116917	-0.037079008	-0.245133569	-0.037390389	-0.62942149	0	0.05230778	-0.242963679	0.148506208	-0.20911738	-0.650087691	0.294682512	-0.389493339	0.366377719	-0.378920553	0.196717437	0.074272244	0.080565648	0.188055089	NA	0.024302293	0.048409139	0.329879121	0.091119593	NA	0.121509417	-0.653926467	NA
299	-0.265007755	-0.054350595	-0.342490309	1.017763701	NA	-0.184644252	0.043059489	0.218412377	0.096763668	-0.237749704	-0.853081218	0.561898894	-0.844667988	0.091393428	0.12018016	-0.111602177	2.249015526	-0.133074354	-0.548700576	0.31685245	-0.294908118	-0.222019184	-0.3213078	-0.002803927	0.05230778	-0.316904931	-0.048980182	0.151088854	0.565029678	0.190868263	-0.349983099	0.100388174	0.117516333	0.619769711	-0.169839779	-0.174591511	-0.214059933	-0.58411342	-0.016739324	-0.042907501	0.649456492	0.359281544	-0.040613683	-0.503684516	0.217688701	-0.484021421	NA	NA	-0.638658995
300	0.022934971	0.077516442	0.59531382	0.17075492	0	-0.342912933	-0.009545413	0.399245808	0.284351532	0.054772236	-0.427097408	3.639731226	-0.606052474	-0.440833252	-0.170313938	-0.746547957	-0.678652734	0.464174171	0.910634767	-0.213812224	0.2469382	-0.060280931	-0.234457311	-0.115074208	0.228170893	0.098215047	-0.312111386	-0.167590592	0.390825131	0.273684563	-0.412187654	-0.537683078	-0.288615842	-0.053400777	-0.300024596	-0.526277728	0.046597285	0.835774579	0.20546826	0.14019663	0.441539852	0.596250743	-0.154784214	-0.266573109	-0.157238776	-0.421746941	1.232997483	-0.448163863	-0.110373057
301	-0.458391314	0.122660013	0.227852447	0.444942199	0.380762495	0.136626598	0.159479315	0.50095709	0.003792798	0.700867304	-0.157706996	-0.404965233	-0.818483672	-0.044997366	-0.14387037	0.21398171	0.749196646	-0.129311736	-0.37353049	-0.1889837	-0.462670582	-0.203586052	0.175716458	-0.208747671	0.111899092	-0.280375497	-0.042907501	-0.095410185	0.139066048	-0.00793137	-0.053189829	0.23791393	0.041621675	0.252080801	-0.06134363	0.051833149	0.221221706	1.139370281	-0.111266812	0.037681067	0.622992921	0.101201881	-0.003004509	-0.228910146	-0.50071029	0.758653983	-1.428784413	NA	NA
302	-0.19431317	0.092488019	-0.620826519	1.245565702	-0.161578196	0.078533878	0.680315202	0.617453336	-0.074723546	0.210585022	-1.1858055	1.783760899	NA	0.200652513	0.01439588	-0.266181541	-0.308156926	0.612750243	0.118493894	0.536025425	0.203919956	-0.087848091	0.022837234	0.251925353	0.497983516	-1.093624747	0.899958077	0.083697559	0.559615788	-0.154434053	-0.02583076	0.473061449	0.455904705	0.087094707	0.191859261	-0.708057793	-0.263705163	1.073226102	0.516290663	-0.118558336	-0.901648455	0.303580028	0.364781993	-0.041655675	-0.085666827	-0.502692124	0.534268675	0.664336099	NA
303	-0.313615454	0.33611503	-0.444257913	0.272390754	NA	-0.427557355	-0.085775777	-0.523742016	-0.42556578	-0.271152771	0.449035323	NA	0.692797119	-0.823028101	0.11234606	0.037488444	-0.530008443	0.569848964	-0.688557728	-0.151171788	-0.33128571	-0.382139283	-0.376586149	-0.046148656	-0.182601596	0.841437867	-0.298540816	-0.007729798	0.724888066	0.084984324	0.514678193	-0.352540645	-0.109591677	-0.209980565	0.364643114	-0.635822114	-0.114962018	-0.110819835	0.189048878	0.310348243	NA	0.363531385	-0.237242476	-1.422128814	-0.12397718	0.135317297	-0.638090975	0.386146364	0.611123345
304	-0.235342659	0.492559815	-0.280640258	-1.142877705	-0.715188311	-0.446599651	-0.407517212	-0.057629113	0.03130485	0.589840111	-0.33477368	0.128832872	0.250213823	-0.042281392	-0.295445463	0.197784717	NA	-0.360396145	-0.361974677	-0.759286983	-0.679047056	-0.356817811	-0.434945413	-0.52256088	-0.275226631	0.311959965	-0.362980497	-0.2338254	0.011137744	-0.089487167	-0.270497248	0.412308307	-0.157472859	-0.686171567	0.160757379	0.02887896	0.032176732	0.248577353	0.180820431	-0.015316704	-0.226273444	-0.022756987	-0.526955006	-0.978964326	-0.20911738	-0.150241663	NA	-0.316355933	NA
305	0.199752092	-0.078718585	0.737403272	0.045451263	0.001199281	-0.293163736	0.21760826	0.158199615	-0.103695236	0.001399021	-0.289550484	-0.036871475	NA	-0.069242903	0.097489621	0.20220588	-0.027371197	0.060718735	0.163733192	-0.353537015	-0.264225996	0.05088321	0.073529233	-0.554429261	-0.435254437	0.216239775	-0.470163642	-0.129425547	-0.238764932	0.142107017	0.08204071	0.198358934	0.066349381	0.659280111	2.020009958	-0.560366069	-0.188621359	-0.280243143	-0.23483665	0.299215308	-0.154200681	0.801194085	0.145657572	-0.177931208	0.259436907	-0.198816859	NA	-0.361256853	NA
[truncated: 888 more columns]
